# Supplementary material for: Integrative approach to identify robust Pattern Recognition Receptors in Eucalyptus grandis: novel candidates for disease resistance
Source: Research Square preprint supplement (doi:10.21203/rs.3.rs-8407889/v1), 2025-12-29
Supplement: Supplementary file 1 [file 0df058e818cd4ef66b0c7ea1.xlsx]

## Sheet: Sheet1
Gene_ID_V2	DRAGO3	RRGPredictor	X350prot	Category	SeqName	Feature	Start	End	Strand	Pfam	GO	FunctionalAnnotation	ProteinID	diffexpressed	Autor	Pathogen	Clon	Year	DOI	cluster_type
Eucgr.A00091	RLK	Unknown	RLK_LRR-XII	TM_K_LRR	Chr01	gene	1778239	1781926	+	PF08263,PF00069	GO:0006468,GO:0005524,GO:0004672	Leucine-rich repeat protein kinase family protein	Eucgr.A00091.1.p							Singleton
Eucgr.A00282	RLK	Unknown	RLK_LRR-XII	TM_K_LRR	Chr01	gene	1092459	1095640	+	PF08263,PF13855,PF00069	GO:0005515,GO:0006468,GO:0005524,GO:0004672	Leucine-rich repeat protein kinase family protein	Eucgr.A00282.1.p							Singleton
Eucgr.A00558	RLP	Unknown	RLP_LRR	TM_LRR	Chr01	gene	16542366	16545460	-	PF00560,PF13855	GO:0005515	receptor like protein 7	Eucgr.A00558.1.p	UP	Santos	A. psidii	Susceptible	2020	10.1007/s11103-020-01030-x	Cluster 7
Eucgr.A00560	RLP	Unknown	RLP_LRR	TM_LRR	Chr01	gene	16508781	16511922	-	PF08263,PF00560,PF13855	GO:0005515	receptor like protein 7	Eucgr.A00560.1.p	UP	Santos	A. psidii	Susceptible	2020	10.1007/s11103-020-01030-x	Cluster 7
Eucgr.A00560	RLP	Unknown	RLP_LRR	TM_LRR	Chr01	gene	16508781	16511922	-	PF08263,PF00560,PF13855	GO:0005515	receptor like protein 7	Eucgr.A00560.1.p	UP	Xiaohui	R. solanacearum		2022	10.1007/s00438-022-01903-4	Cluster 7
Eucgr.A00564	RLP	Unknown	RLP_LRR	TM_LRR	Chr01	gene	16487397	16491070	-	PF00560	GO:0005515	receptor like protein 6	Eucgr.A00564.1.p	UP	Santos	A. psidii	Susceptible	2020	10.1007/s11103-020-01030-x	Cluster 7
Eucgr.A00564	RLP	Unknown	RLP_LRR	TM_LRR	Chr01	gene	16487397	16491070	-	PF00560	GO:0005515	receptor like protein 6	Eucgr.A00564.1.p	UP	Mangwanda	C. austroafricana	Susceptible	2015	10.1186/s12864-015-1529-x	Cluster 7
Eucgr.A00564	RLP	Unknown	RLP_LRR	TM_LRR	Chr01	gene	16487397	16491070	-	PF00560	GO:0005515	receptor like protein 6	Eucgr.A00564.1.p	UP	Mangwanda	C. austroafricana	Resistent	2015	10.1186/s12864-015-1529-x	Cluster 7
Eucgr.A00565	RLP	Unknown	RLP_LRR	TM_LRR	Chr01	gene	16468579	16471754	-	PF13855	GO:0005515	receptor like protein 7	Eucgr.A00565.1.p							Cluster 7
Eucgr.A00568	RLP	Unknown	RLP_LRR	TM_LRR	Chr01	gene	16432344	16435865	-	PF00560,PF13855	GO:0005515	receptor like protein 7	Eucgr.A00568.1.p							Cluster 7
Eucgr.A00579	RLP	Unknown	RLP_LRR	TM	Chr01	gene	16323108	16326242	-	PF00560	GO:0005515	receptor like protein 33	Eucgr.A00579.1.p							Cluster 7
Eucgr.A00583	RLP	Unknown	RLP_LRR	TM_LRR	Chr01	gene	16266991	16270071	-	PF00560,PF13855	GO:0005515	receptor like protein 23	Eucgr.A00583.1.p	UP	Santos	A. psidii	Susceptible	2020	10.1007/s11103-020-01030-x	Cluster 7
Eucgr.A00585	RLP	Unknown	RLP_LRR	TM_LRR	Chr01	gene	16235861	16238891	-	PF13855	GO:0005515	receptor like protein 7	Eucgr.A00585.1.p							Cluster 7
Eucgr.A00587	RLP	Unknown	RLP_LRR	TM_LRR	Chr01	gene	16191825	16195219	-	PF00560,PF13855	GO:0005515	receptor like protein 7	Eucgr.A00587.1.p							Cluster 7
Eucgr.A00590	RLP	Unknown	RLP_LRR	TM_LRR	Chr01	gene	16159163	16162485	-	PF00560,PF13855	GO:0005515	receptor like protein 6	Eucgr.A00590.1.p							Cluster 7
Eucgr.A00620	CL	Unknown	RLP_LRR	TM_LRR	Chr01	gene	15678525	15682379	+	PF00560,PF13855	GO:0005515	disease resistance family protein / LRR family protein	Eucgr.A00620.1.p							Cluster 6
Eucgr.A00621	RLP	Unknown	RLP_LRR	TM_LRR	Chr01	gene	15668582	15671902	+	PF08263,PF13855	GO:0005515	disease resistance family protein / LRR family protein	Eucgr.A00621.1.p	DOWN	Mangwanda	C. austroafricana	Susceptible	2015	10.1186/s12864-015-1529-x	Cluster 6
Eucgr.A00622	RLP	Unknown	RLP_LRR	TM_LRR	Chr01	gene	15660519	15663119	+	PF00560,PF13855	GO:0005515	disease resistance family protein / LRR family protein	Eucgr.A00622.1.p							Cluster 6
Eucgr.A00695	RLP	Unknown	RLP_LRR	TM_LRR	Chr01	gene	14185431	14188523	-	PF13855	GO:0005515	receptor like protein 6	Eucgr.A00695.1.p							Cluster 5
Eucgr.A00698	RLP	Unknown	RLP_LRR	TM_LRR	Chr01	gene	14141394	14144375	-	PF00560,PF13855	GO:0005515	receptor like protein 50	Eucgr.A00698.1.p							Cluster 5
Eucgr.A00704	RLP	Unknown	RLP_LRR	TM_LRR	Chr01	gene	14083343	14086450	-	PF00560,PF13855	GO:0005515	Leucine-rich repeat transmembrane protein kinase	Eucgr.A00704.1.p							Cluster 5
Eucgr.A00706	RLP	Unknown	RLP_LRR	TM_LRR	Chr01	gene	14049859	14052962	-	PF13855	GO:0005515	receptor like protein 6	Eucgr.A00706.1.p							Cluster 5
Eucgr.A00726	RLK	Unknown	RLK_LRR-VII	TM_K_LRR	Chr01	gene	13778705	13783443	-	PF08263,PF00560,PF13855,PF07714	GO:0005515,GO:0006468,GO:0004672	Leucine-rich receptor-like protein kinase family protein	Eucgr.A00726.1.p	DOWN	Mangwanda	C. austroafricana	Resistent	2015	10.1186/s12864-015-1529-x	Cluster 4
Eucgr.A00728	RLP	Unknown	RLP_LRR	TM_LRR	Chr01	gene	13756535	13759579	-	PF00560,PF13855	GO:0005515	disease resistance family protein / LRR family protein	Eucgr.A00728.1.p	UP	Santos	A. psidii	Susceptible	2020	10.1007/s11103-020-01030-x	Cluster 4
Eucgr.A00785	CLK	Unknown	RLK_LRR-III	TM_K_LRR	Chr01	gene	12673628	12678433	+	PF08263,PF00069	GO:0006468,GO:0005524,GO:0004672	Leucine-rich repeat protein kinase family protein	Eucgr.A00785.1.p							Singleton
Eucgr.A00802	RLK	Unknown	RLK_LRR-VIII	TM_K_LRR	Chr01	gene	12336726	12347514	-	PF08263,PF00069	GO:0006468,GO:0005524,GO:0004672	Leucine-rich repeat protein kinase family protein	Eucgr.A00802.1.p	UP	Mangwanda	C. austroafricana	Susceptible	2015	10.1186/s12864-015-1529-x	Cluster 3
Eucgr.A00803	RLK	Unknown	RLK_LRR-VIII	TM_K_LRR	Chr01	gene	12272872	12283445	-	PF00560,PF08263,PF13855,PF07714	GO:0005515,GO:0006468,GO:0004672	Leucine-rich repeat protein kinase family protein	Eucgr.A00803.1.p							Cluster 3
Eucgr.A00805	RLK	Unknown	RLK_LRR-VIII	TM_K_LRR	Chr01	gene	12220922	12231092	-	PF08263,PF07714	GO:0006468,GO:0004672	Leucine-rich repeat protein kinase family protein	Eucgr.A00805.1.p							Cluster 3
Eucgr.A00882	RLK	Unknown	RLK_LRR-VIII	TM_K_LRR	Chr01	gene	11545651	11551100	+	PF08263,PF00069	GO:0006468,GO:0005524,GO:0004672	Leucine-rich repeat protein kinase family protein	Eucgr.A00882.1.p	DOWN	Xiaohui	R. solanacearum		2022	10.1007/s00438-022-01903-4	Cluster 2
Eucgr.A00882	RLK	Unknown	RLK_LRR-VIII	TM_K_LRR	Chr01	gene	11545651	11551100	+	PF08263,PF00069	GO:0006468,GO:0005524,GO:0004672	Leucine-rich repeat protein kinase family protein	Eucgr.A00882.1.p	UP	Xiaohui	R. solanacearum		2022	10.1007/s00438-022-01903-4	Cluster 2
Eucgr.A00883	RLK	Unknown	RLK_LRR-VIII	TM_K	Chr01	gene	11533246	11537667	+	PF07714	GO:0006468,GO:0004672	Leucine-rich repeat protein kinase family protein	Eucgr.A00883.1.p	UP	Mangwanda	C. austroafricana	Susceptible	2015	10.1186/s12864-015-1529-x	Cluster 2
Eucgr.A00883	RLK	Unknown	RLK_LRR-VIII	TM_K	Chr01	gene	11533246	11537667	+	PF07714	GO:0006468,GO:0004672	Leucine-rich repeat protein kinase family protein	Eucgr.A00883.1.p	UP	Mangwanda	C. austroafricana	Resistent	2015	10.1186/s12864-015-1529-x	Cluster 2
Eucgr.A00884	RLK	Unknown	RLK_LRR-VIII	TM_K	Chr01	gene	11520142	11525137	+	PF00069	GO:0006468,GO:0005524,GO:0004672	Leucine-rich repeat protein kinase family protein	Eucgr.A00884.1.p							Cluster 2
Eucgr.A00884	RLK	Unknown	RLK_LRR-VIII	TM_K	Chr01	gene	11520142	11525137	+			Leucine-rich repeat protein kinase family protein	Eucgr.A00884.1.p							Cluster 2
Eucgr.A00885	RLK	Unknown	RLK_LRR-VIII	TM_K_LRR	Chr01	gene	11507054	11513567	+	PF08263,PF07714	GO:0006468,GO:0004672	Leucine-rich repeat protein kinase family protein	Eucgr.A00885.1.p	UP	Xiaohui	R. solanacearum		2022	10.1007/s00438-022-01903-4	Cluster 2
Eucgr.A00886	RLK	Unknown	RLK_LRR-VIII	TM_K_LRR	Chr01	gene	11491112	11497461	+	PF08263,PF07714	GO:0006468,GO:0004672	Leucine-rich repeat protein kinase family protein	Eucgr.A00886.1.p	DOWN	Oates	L. invasa	Resistent	2015	10.1093/pcp/pcv064	Cluster 2
Eucgr.A00886	RLK	Unknown	RLK_LRR-VIII	TM_K_LRR	Chr01	gene	11491112	11497461	+	PF08263,PF07714	GO:0006468,GO:0004672	Leucine-rich repeat protein kinase family protein	Eucgr.A00886.1.p	UP	Xiaohui	R. solanacearum		2022	10.1007/s00438-022-01903-4	Cluster 2
Eucgr.A00886	RLK	Unknown	RLK_LRR-VIII	TM_K_LRR	Chr01	gene	11491112	11497461	+	PF08263,PF07714	GO:0006468,GO:0004672	Leucine-rich repeat protein kinase family protein	Eucgr.A00886.1.p	DOWN	Xiaohui	R. solanacearum		2022	10.1007/s00438-022-01903-4	Cluster 2
Eucgr.A00887	RLK	Unknown	RLK_LRR-VIII	TM_K	Chr01	gene	11449218	11455537	+	PF07714	GO:0006468,GO:0004672	Leucine-rich repeat protein kinase family protein	Eucgr.A00887.1.p	UP	Mangwanda	C. austroafricana	Susceptible	2015	10.1186/s12864-015-1529-x	Cluster 2
Eucgr.A00887	RLK	Unknown	RLK_LRR-VIII	TM_K	Chr01	gene	11449218	11455537	+	PF07714	GO:0006468,GO:0004672	Leucine-rich repeat protein kinase family protein	Eucgr.A00887.1.p	UP	Mangwanda	C. austroafricana	Resistent	2015	10.1186/s12864-015-1529-x	Cluster 2
Eucgr.A00887	RLK	Unknown	RLK_LRR-VIII	TM_K	Chr01	gene	11449218	11455537	+	PF07714	GO:0006468,GO:0004672	Leucine-rich repeat protein kinase family protein	Eucgr.A00887.1.p	DOWN	Oates	L. invasa	Resistent	2015	10.1093/pcp/pcv064	Cluster 2
Eucgr.A00983	RLK	Unknown	RLK_LRR-XV	TM_K_LRR	Chr01	gene	29937937	29941475	-	PF08263,PF00560,PF13855,PF00069	GO:0005515,GO:0006468,GO:0005524,GO:0004672	receptor-like protein kinase 2	Eucgr.A00983.1.p	UP	Xiaohui	R. solanacearum		2022	10.1007/s00438-022-01903-4	Singleton
Eucgr.A01030	RLP	Unknown	RLP_LRR	TM_LRR	Chr01	gene	30485523	30488296	+	PF08263,PF00560,PF13855	GO:0005515	receptor like protein 12	Eucgr.A01030.1.p	UP	Santos	A. psidii	Susceptible	2020	10.1007/s11103-020-01030-x	Cluster 8
Eucgr.A01037	RLP	Unknown	RLP_LRR	TM_LRR	Chr01	gene	30626380	30629419	+	PF08263,PF13855	GO:0005515	receptor like protein 19	Eucgr.A01037.1.p							Cluster 8
Eucgr.A01326	RLK	Unknown	RLK_LRR-XII	TM_K_LRR	Chr01	gene	8252554	8256720	-	PF00560,PF08263,PF00069,PF13855	GO:0005515,GO:0006468,GO:0005524,GO:0004672	Protein kinase family protein with leucine-rich repeat domain	Eucgr.A01326.1.p	DOWN	Xiaohui	R. solanacearum		2022	10.1007/s00438-022-01903-4	Cluster 1
Eucgr.A01326	RLK	Unknown	RLK_LRR-XII	TM_K_LRR	Chr01	gene	8252554	8256720	-	PF00560,PF08263,PF07714,PF13855	GO:0005515,GO:0006468,GO:0004672	Protein kinase family protein with leucine-rich repeat domain	Eucgr.A01326.1.p	DOWN	Xiaohui	R. solanacearum		2022	10.1007/s00438-022-01903-4	Cluster 1
Eucgr.A01327	CLK	Unknown	RLK_LRR-XII	TM_K_LRR	Chr01	gene	8261021	8265297	-	PF08263,PF00069,PF13855	GO:0006468,GO:0005524,GO:0004672,GO:0005515	Leucine-rich repeat receptor-like protein kinase family protein	Eucgr.A01327.1.p							Cluster 1
Eucgr.A01328	RLK	Unknown	RLK_LRR-XII	TM_K_LRR	Chr01	gene	8283902	8287672	-	PF08263,PF00069,PF13855	GO:0006468,GO:0005524,GO:0004672,GO:0005515	Leucine-rich repeat receptor-like protein kinase family protein	Eucgr.A01328.1.p	DOWN	Xiaohui	R. solanacearum		2022	10.1007/s00438-022-01903-4	Cluster 1
Eucgr.A01333	CLK	Unknown	RLK_LRR-XII	TM_K_LRR	Chr01	gene	8344680	8348551	+	PF08263,PF12799,PF00069,PF13855	GO:0006468,GO:0005524,GO:0004672,GO:0005515	Leucine-rich repeat receptor-like protein kinase family protein	Eucgr.A01333.1.p							Cluster 1
Eucgr.A01340	CLK	Unknown	RLK_LRR-XII	TM_K_LRR	Chr01	gene	8518815	8523136	-	PF00560,PF08263,PF13855,PF00069	GO:0005515,GO:0006468,GO:0005524,GO:0004672	Leucine-rich repeat receptor-like protein kinase family protein	Eucgr.A01340.1.p							Cluster 1
Eucgr.A01341	CLK	Unknown	RLK_LRR-XII	TM_K_LRR	Chr01	gene	8536124	8539332	-	PF00560,PF08263,PF13855,PF00069	GO:0005515,GO:0006468,GO:0005524,GO:0004672	Leucine-rich repeat receptor-like protein kinase family protein	Eucgr.A01341.1.p							Cluster 1
Eucgr.A01343	CLK	Unknown	RLK_LRR-XII	TM_K_LRR	Chr01	gene	8569235	8572449	-	PF00560,PF13855,PF00069	GO:0005515,GO:0006468,GO:0005524,GO:0004672	Leucine-rich repeat receptor-like protein kinase family protein	Eucgr.A01343.1.p							Cluster 1
Eucgr.A01344	CLK	Unknown	RLK_LRR-XII	TM_K_LRR	Chr01	gene	8609116	8612233	-	PF08263,PF13855,PF00069	GO:0005515,GO:0006468,GO:0005524,GO:0004672	Leucine-rich repeat receptor-like protein kinase family protein	Eucgr.A01344.1.p	DOWN	Xiaohui	R. solanacearum		2022	10.1007/s00438-022-01903-4	Cluster 1
Eucgr.A01344	CLK	Unknown	RLK_LRR-XII	TM_K_LRR	Chr01	gene	8609116	8612233	-	PF08263,PF13855,PF00069	GO:0005515,GO:0006468,GO:0005524,GO:0004672	Leucine-rich repeat receptor-like protein kinase family protein	Eucgr.A01344.1.p	UP	Xiaohui	R. solanacearum		2022	10.1007/s00438-022-01903-4	Cluster 1
Eucgr.A01345	CLK	Unknown	RLK_LRR-XII	TM_LRR	Chr01	gene	8647354	8651156	+	PF00560,PF00069,PF13855	GO:0005515,GO:0006468,GO:0005524,GO:0004672	Protein kinase family protein with leucine-rich repeat domain	Eucgr.A01345.1.p							Cluster 1
Eucgr.A01347	CLK	Unknown	RLK_LRR-XII	TM_K_LRR	Chr01	gene	8721161	8724369	-	PF08263,PF00560,PF13855,PF00069	GO:0005515,GO:0006468,GO:0005524,GO:0004672	Leucine-rich repeat receptor-like protein kinase family protein	Eucgr.A01347.1.p							Cluster 1
Eucgr.A01348	RLK	Unknown	RLK_LRR-XII	TM_K_LRR	Chr01	gene	8739671	8743012	-	PF00560,PF08263,PF13855,PF00069	GO:0005515,GO:0006468,GO:0005524,GO:0004672	Leucine-rich repeat receptor-like protein kinase family protein	Eucgr.A01348.1.p	UP	Xiaohui	R. solanacearum		2022	10.1007/s00438-022-01903-4	Cluster 1
Eucgr.A01348	RLK	Unknown	RLK_LRR-XII	TM_K_LRR	Chr01	gene	8739671	8743012	-	PF00560,PF08263,PF13855,PF00069	GO:0005515,GO:0006468,GO:0005524,GO:0004672	Leucine-rich repeat receptor-like protein kinase family protein	Eucgr.A01348.1.p	DOWN	Xiaohui	R. solanacearum		2022	10.1007/s00438-022-01903-4	Cluster 1
Eucgr.A01352	RLK	Unknown	RLK_LRR-XII	TM_K_LRR	Chr01	gene	8766255	8770138	-	PF00560,PF13855,PF00069	GO:0005515,GO:0006468,GO:0005524,GO:0004672	Leucine-rich repeat receptor-like protein kinase family protein	Eucgr.A01352.1.p	UP	Xiaohui	R. solanacearum		2022	10.1007/s00438-022-01903-4	Cluster 1
Eucgr.A01353	RLK	Unknown	RLK_LRR-XII	TM_K_LRR	Chr01	gene	8787584	8790767	-	PF08263,PF00560,PF13855,PF00069	GO:0005515,GO:0006468,GO:0005524,GO:0004672	Leucine-rich repeat receptor-like protein kinase family protein	Eucgr.A01353.1.p	UP	Xiaohui	R. solanacearum		2022	10.1007/s00438-022-01903-4	Cluster 1
Eucgr.A01354	CLK	Unknown	RLK_LRR-XII	TM_K_LRR	Chr01	gene	8841339	8844469	-	PF08263,PF00560,PF13855,PF00069	GO:0005515,GO:0006468,GO:0005524,GO:0004672	Leucine-rich repeat receptor-like protein kinase family protein	Eucgr.A01354.1.p							Cluster 1
Eucgr.A01788	RLK	Unknown	RLK_LRR-V	TM_K_LRR	Chr01	gene	32829968	32835131	-	PF08263,PF07714	GO:0006468,GO:0004672	STRUBBELIG-receptor family 3	Eucgr.A01788.1.p							Singleton
Eucgr.A01951	RLK	Unknown	RLK_LRR-VIII	TM_K_LRR_Malec	Chr01	gene	34912036	34921221	+	PF00560,PF13855,PF07714,PF11721	GO:0005515,GO:0006468,GO:0004672	Leucine-rich repeat transmembrane protein kinase	Eucgr.A01951.1.p	UP	Mangwanda	C. austroafricana	Resistent	2015	10.1186/s12864-015-1529-x	Singleton
Eucgr.A01951	RLK	Unknown	RLK_LRR-VIII	TM_K_LRR_Malec	Chr01	gene	34912036	34921221	+	PF00560,PF07714,PF13855,PF11721	GO:0005515,GO:0006468,GO:0004672	Leucine-rich repeat transmembrane protein kinase	Eucgr.A01951.1.p	UP	Mangwanda	C. austroafricana	Resistent	2015	10.1186/s12864-015-1529-x	Singleton
Eucgr.A02410	RLK	Unknown	RLK_LRR-XI	TM_K_LRR	Chr01	gene	39471896	39475207	+	PF08263,PF13855,PF00069	GO:0005515,GO:0006468,GO:0005524,GO:0004672	Leucine-rich repeat receptor-like protein kinase family protein	Eucgr.A02410.1.p	UP	Xiaohui	R. solanacearum		2022	10.1007/s00438-022-01903-4	Cluster 9
Eucgr.A02416	RLK	Unknown	RLK_LRR-III	TM_K_LRR	Chr01	gene	39533598	39537645	+	PF13855,PF08263,PF07714	GO:0005515,GO:0006468,GO:0004672	Leucine-rich repeat protein kinase family protein	Eucgr.A02416.1.p							Cluster 9
Eucgr.A02490	RLP	Unknown	RLP_LRR	TM_LRR	Chr01	gene	40225865	40229383	-	PF08263,PF00560,PF13855	GO:0005515	disease resistance family protein / LRR family protein	Eucgr.A02490.1.p							Singleton
Eucgr.A02593	RLK	Unknown	RLK_LRR-IX	TM_K_LRR	Chr01	gene	41116229	41120138	+	PF00560,PF08263,PF13855,PF07714	GO:0005515,GO:0006468,GO:0004672	Leucine-rich repeat protein kinase family protein	Eucgr.A02593.1.p	UP	Xiaohui	R. solanacearum		2022	10.1007/s00438-022-01903-4	Singleton
Eucgr.A02671	RLK	Unknown	RLK_LRR-III	TM_K_LRR	Chr01	gene	41990597	41993385	-	PF00560,PF08263,PF07714	GO:0005515,GO:0006468,GO:0004672	Leucine-rich repeat protein kinase family protein	Eucgr.A02671.1.p	UP	Xiaohui	R. solanacearum		2022	10.1007/s00438-022-01903-4	Singleton
Eucgr.A02805	RLK	Unknown	RLK_LRR-X	TM_K_LRR	Chr01	gene	43215936	43219823	-	PF08263,PF00560,PF07714,PF13855	GO:0005515,GO:0006468,GO:0004672	Leucine-rich repeat transmembrane protein kinase	Eucgr.A02805.1.p	DOWN	Xiaohui	R. solanacearum		2022	10.1007/s00438-022-01903-4	Singleton
Eucgr.A02805	RLK	Unknown	RLK_LRR-X	TM_K_LRR	Chr01	gene	43215936	43219823	-	PF08263,PF00560,PF07714,PF13855	GO:0005515,GO:0006468,GO:0004672	Leucine-rich repeat transmembrane protein kinase	Eucgr.A02805.1.p	DOWN	Mangwanda	C. austroafricana	Resistent	2015	10.1186/s12864-015-1529-x	Singleton
Eucgr.A02902	RLK	Unknown	RLK_LRR-XI	TM_K_LRR	Chr01	gene	44094057	44097536	-	PF08263,PF00560,PF13855,PF00069	GO:0005515,GO:0006468,GO:0005524,GO:0004672	Leucine-rich repeat protein kinase family protein	Eucgr.A02902.1.p	UP	Xiaohui	R. solanacearum		2022	10.1007/s00438-022-01903-4	Singleton
Eucgr.A02902	RLK	Unknown	RLK_LRR-XI	TM_K_LRR	Chr01	gene	44094057	44097536	-	PF08263,PF00560,PF13855,PF00069	GO:0005515,GO:0006468,GO:0005524,GO:0004672	Leucine-rich repeat protein kinase family protein	Eucgr.A02902.1.p	DOWN	Mangwanda	C. austroafricana	Resistent	2015	10.1186/s12864-015-1529-x	Singleton
Eucgr.B00013	RLK	Unknown	RLK_LRR-XI	TM_K_LRR	Chr06	gene	35841097	35845214	+	PF08263,PF00560,PF13855,PF00069	GO:0005515,GO:0006468,GO:0005524,GO:0004672	Protein kinase family protein with leucine-rich repeat domain	Eucgr.B00013.1.p							Cluster 58
Eucgr.B00019	RLK	Unknown	RLK_LRR-XI	TM_K_LRR	Chr06	gene	35644493	35648772	+	PF08263,PF00560,PF12799,PF00069,PF13855	GO:0005515,GO:0006468,GO:0005524,GO:0004672	Protein kinase family protein with leucine-rich repeat domain	Eucgr.B00019.1.p							Cluster 58
Eucgr.B00060	RLK	Unknown	RLK_LRR-XII	TM_K_LRR	Chr06	gene	34950119	34953447	-	PF00560,PF08263,PF00069,PF13855	GO:0005515,GO:0006468,GO:0005524,GO:0004672	Leucine-rich repeat receptor-like protein kinase family protein	Eucgr.B00060.1.p							Cluster 57
Eucgr.B00062	RLK	Unknown	RLK_LRR-XIII	TM_K_LRR	Chr06	gene	34900788	34903687	-	PF08263,PF13855,PF00069	GO:0005515,GO:0006468,GO:0005524,GO:0004672	Leucine-rich repeat receptor-like protein kinase family protein	Eucgr.B00062.1.p							Cluster 57
Eucgr.B00130	RLK	Unknown	RLK_LRR-VI	TM_K_LRR	Chr02	gene	732492	737282	-	PF13855,PF07714	GO:0005515,GO:0006468,GO:0004672	Leucine-rich repeat protein kinase family protein	Eucgr.B00130.1.p	DOWN	Xiaohui	R. solanacearum		2022	10.1007/s00438-022-01903-4	Singleton
Eucgr.B00130	RLK	Unknown	RLK_LRR-VI	TM_K_LRR	Chr02	gene	732492	737282	-	PF13855,PF07714	GO:0005515,GO:0006468,GO:0004672	Leucine-rich repeat protein kinase family protein	Eucgr.B00130.1.p	DOWN	Mangwanda	C. austroafricana	Resistent	2015	10.1186/s12864-015-1529-x	Singleton
Eucgr.B00130	RLK	Unknown	RLK_LRR-VI	TM_K_LRR	Chr02	gene	732492	737282	-	PF13855,PF07714	GO:0005515,GO:0006468,GO:0004672	Leucine-rich repeat protein kinase family protein	Eucgr.B00130.1.p	UP	Xiaohui	R. solanacearum		2022	10.1007/s00438-022-01903-4	Singleton
Eucgr.B00174	RLK	Unknown	RLK_LRR-XVI	TM_K_LRR	Chr02	gene	1187909	1190202	-	PF13855,PF00069	GO:0005515,GO:0006468,GO:0005524,GO:0004672	Leucine-rich repeat protein kinase family protein	Eucgr.B00174.1.p	UP	Xiaohui	R. solanacearum		2022	10.1007/s00438-022-01903-4	Singleton
Eucgr.B00241	RLK	Unknown	RLK_LRR-XI	TM_K_LRR	Chr02	gene	2157511	2161529	+	PF08263,PF07714,PF13855	GO:0006468,GO:0004672,GO:0005515	Leucine-rich receptor-like protein kinase family protein	Eucgr.B00241.1.p							Singleton
Eucgr.B00352	RLK	Unknown	RLK_LRR-III	TM_K	Chr02	gene	3378753	3380701	+	PF00069	GO:0006468,GO:0005524,GO:0004672	Leucine-rich repeat protein kinase family protein	Eucgr.B00352.1.p							Singleton
Eucgr.B00412	RLK	Unknown	RLK_LRR-XIII	TM_K_LRR	Chr02	gene	3918861	3923809	+	PF08263,PF13855,PF00069	GO:0005515,GO:0006468,GO:0005524,GO:0004672	Leucine-rich repeat protein kinase family protein	Eucgr.B00412.1.p	DOWN	Oates	L. invasa	Susceptible	2015	10.1093/pcp/pcv064	Singleton
Eucgr.B00412	RLK	Unknown	RLK_LRR-XIII	TM_K_LRR	Chr02	gene	3918861	3923809	+	PF08263,PF13855,PF00069	GO:0005515,GO:0006468,GO:0005524,GO:0004672	Leucine-rich repeat protein kinase family protein	Eucgr.B00412.1.p	DOWN	Mangwanda	C. austroafricana	Resistent	2015	10.1186/s12864-015-1529-x	Singleton
Eucgr.B00536	RLP	Unknown	RLP_LRR	TM_LRR	Chr02	gene	5535292	5537496	+	PF00560,PF13855	GO:0005515	receptor like protein 15	Eucgr.B00536.1.p							Cluster 10
Eucgr.B00556	RLK	Unknown	RLK_LRR-X	TM_K_LRR	Chr02	gene	5726506	5730388	+	PF08263,PF00560,PF13855,PF00069	GO:0005515,GO:0006468,GO:0005524,GO:0004672	Leucine-rich repeat protein kinase family protein	Eucgr.B00556.1.p	UP	Xiaohui	R. solanacearum		2022	10.1007/s00438-022-01903-4	Cluster 10
Eucgr.B00556	RLK	Unknown	RLK_LRR-X	TM_K_LRR	Chr02	gene	5726506	5730388	+	PF08263,PF00560,PF13855,PF00069	GO:0005515,GO:0006468,GO:0005524,GO:0004672	Leucine-rich repeat protein kinase family protein	Eucgr.B00556.1.p	UP	Mangwanda	C. austroafricana	Susceptible	2015	10.1186/s12864-015-1529-x	Cluster 10
Eucgr.B00683	RLP	Unknown	RLP_LRR	TM_LRR	Chr02	gene	7149343	7152473	+	PF08263,PF00560,PF13855	GO:0005515	receptor like protein 7	Eucgr.B00683.1.p							Singleton
Eucgr.B00906	RLK	Unknown	RLK_LRR-XIII	TM_K_LRR	Chr02	gene	12108582	12111536	-	PF08263,PF00560,PF00069,PF13855	GO:0005515,GO:0006468,GO:0005524,GO:0004672	Leucine-rich repeat receptor-like protein kinase family protein	Eucgr.B00906.1.p	UP	Xiaohui	R. solanacearum		2022	10.1007/s00438-022-01903-4	Singleton
Eucgr.B00951	RLK	Unknown	RLK_LRR-XIII	TM_K_LRR	Chr02	gene	12873109	12876994	+	PF08263,PF00069,PF13855	GO:0006468,GO:0005524,GO:0004672,GO:0005515	Leucine-rich repeat receptor-like protein kinase family protein	Eucgr.B00951.1.p	UP	Xiaohui	R. solanacearum		2022	10.1007/s00438-022-01903-4	Singleton
Eucgr.B00963	RLK	Unknown	RLK_LRR-VIII	TM_K_Malec	Chr02	gene	13190604	13198101	-	PF11721,PF07714	GO:0006468,GO:0004672	Leucine-rich repeat transmembrane protein kinase	Eucgr.B00963.1.p							Singleton
Eucgr.B00972	RLK	Unknown	RLK_LRR-VIII	TM_K_Malec	Chr02	gene	13431218	13438966	-	PF11721,PF07714	GO:0006468,GO:0004672	Leucine-rich repeat transmembrane protein kinase	Eucgr.B00972.1.p	UP	Santos	A. psidii	Susceptible	2020	10.1007/s11103-020-01030-x	Singleton
Eucgr.B01034	RLK	Unknown	RLK_LRR-XII	TM_K_LRR	Chr02	gene	14406452	14410121	+	PF00560,PF13855,PF00069	GO:0005515,GO:0006468,GO:0005524,GO:0004672	Leucine-rich repeat receptor-like protein kinase family protein	Eucgr.B01034.1.p	DOWN	Mangwanda	C. austroafricana	Susceptible	2015	10.1186/s12864-015-1529-x	Singleton
Eucgr.B01137	RLK	Unknown	RLK_LRR-XII	TM_K_LRR	Chr02	gene	17238950	17241922	-	PF08263,PF00069,PF13855	GO:0006468,GO:0005524,GO:0004672,GO:0005515	Leucine-rich repeat protein kinase family protein	Eucgr.B01137.1.p							Singleton
Eucgr.B01468	RLK	Unknown	RLK_LRR-VIII	TM_K_LRR_Malec	Chr02	gene	24744010	24755757	-	PF13855,PF00069,PF11721	GO:0005515,GO:0006468,GO:0005524,GO:0004672	Leucine-rich repeat transmembrane protein kinase	Eucgr.B01468.1.p	DOWN	Santos	A. psidii	Susceptible	2020	10.1007/s11103-020-01030-x	Singleton
Eucgr.B02130	RLK	Unknown	RLK_LRR-XII	TM_K_LRR	Chr02	gene	40304183	40307469	+	PF08263,PF13855,PF07714	GO:0005515,GO:0006468,GO:0004672	Leucine-rich repeat protein kinase family protein	Eucgr.B02130.1.p							Singleton
Eucgr.B02157	RLK	Unknown	RLK_LRR-XI	TM_K_LRR	Chr02	gene	40698547	40701629	-	PF08263,PF13855,PF00069	GO:0005515,GO:0006468,GO:0005524,GO:0004672	Leucine-rich receptor-like protein kinase family protein	Eucgr.B02157.1.p							Cluster 11
Eucgr.B02171	RLK	Unknown	RLK_LRR-XI	TM_K_LRR	Chr02	gene	40829654	40833225	+	PF08263,PF13855,PF00069	GO:0005515,GO:0006468,GO:0005524,GO:0004672	Leucine-rich repeat protein kinase family protein	Eucgr.B02171.1.p	UP	Santos	A. psidii	Susceptible	2020	10.1007/s11103-020-01030-x	Cluster 11
Eucgr.B02229	RLK	Unknown	RLK_LRR-VI	TM_K_LRR	Chr02	gene	41470170	41475326	+	PF08263,PF07714	GO:0006468,GO:0004672	Leucine-rich repeat protein kinase family protein	Eucgr.B02229.1.p	DOWN	Xiaohui	R. solanacearum		2022	10.1007/s00438-022-01903-4	Singleton
Eucgr.B02576	RLK	Unknown	RLK_LRR-X	TM_K_LRR	Chr02	gene	45766845	45769094	+	PF08263,PF07714	GO:0006468,GO:0004672	Leucine-rich repeat protein kinase family protein	Eucgr.B02576.1.p							Cluster 12
Eucgr.B02583	RLP	Unknown	RLP_LRR	TM_LRR	Chr02	gene	45825020	45827262	-	PF08263,PF00560,PF13855	GO:0005515	Leucine-rich receptor-like protein kinase family protein	Eucgr.B02583.1.p							Cluster 12
Eucgr.B02648	RLK	Unknown	RLK_LRR-X	TM_K_LRR	Chr02	gene	46475969	46479370	+	PF08263,PF13855,PF00069	GO:0005515,GO:0006468,GO:0005524,GO:0004672	BRI1-like 2	Eucgr.B02648.1.p							Singleton
Eucgr.B02699	RLK	RLK	RLK_LRR-IX	TM_K_LRR	Chr02	gene	46790424	46795504	+	PF08263,PF13855,PF00069	GO:0005515,GO:0006468,GO:0005524,GO:0004672	transmembrane kinase 1	Eucgr.B02699.1.p							Singleton
Eucgr.B02903	RLK	Unknown	RLK_LRR-XII	TM_K	Chr02	gene	48636530	48640026	+	PF00560,PF00069	GO:0005515,GO:0006468,GO:0005524,GO:0004672	Leucine-rich repeat protein kinase family protein	Eucgr.B02903.1.p							Singleton
Eucgr.B02930	RLK	Unknown	RLK_LRR-XII	TM_K_LRR	Chr02	gene	48375280	48378250	-	PF08263,PF00560,PF00069	GO:0005515,GO:0006468,GO:0005524,GO:0004672	Leucine-rich repeat protein kinase family protein	Eucgr.B02930.1.p	DOWN	Santos	A. psidii	Susceptible	2020	10.1007/s11103-020-01030-x	Cluster 13
Eucgr.B02933	RLK	Unknown	RLK_LRR-XII	TM_K_LRR	Chr02	gene	48339238	48347280	-	PF00560,PF08263,PF07714,PF00069	GO:0005515,GO:0006468,GO:0004672,GO:0005524	Leucine-rich repeat protein kinase family protein	Eucgr.B02933.1.p							Cluster 13
Eucgr.B03087	RLK	Unknown	RLK_LRR-II	TM_K_LRR	Chr02	gene	51188519	51192057	+	PF00560,PF08263,PF00069	GO:0005515,GO:0006468,GO:0005524,GO:0004672	NSP-interacting kinase 2	Eucgr.B03087.1.p	DOWN	Xiaohui	R. solanacearum		2022	10.1007/s00438-022-01903-4	Singleton
Eucgr.B03087	RLK	Unknown	RLK_LRR-II	TM_K_LRR	Chr02	gene	51188519	51192057	+	PF00560,PF08263,PF00069	GO:0005515,GO:0006468,GO:0005524,GO:0004672	NSP-interacting kinase 2	Eucgr.B03087.1.p	DOWN	Mangwanda	C. austroafricana	Resistent	2015	10.1186/s12864-015-1529-x	Singleton
Eucgr.B03087	RLK	Unknown	RLK_LRR-II	TM_K_LRR	Chr02	gene	51188519	51192057	+	PF00560,PF08263,PF00069	GO:0005515,GO:0006468,GO:0005524,GO:0004672	NSP-interacting kinase 2	Eucgr.B03087.1.p	DOWN	Oates	L. invasa	Resistent	2015	10.1093/pcp/pcv064	Singleton
Eucgr.B03087	RLK	Unknown	RLK_LRR-II	TM_K_LRR	Chr02	gene	51188519	51192057	+	PF00560,PF08263,PF00069	GO:0005515,GO:0006468,GO:0005524,GO:0004672	NSP-interacting kinase 2	Eucgr.B03087.1.p	DOWN	Mangwanda	C. austroafricana	Susceptible	2015	10.1186/s12864-015-1529-x	Singleton
Eucgr.B03087	RLK	Unknown	RLK_LRR-II	TM_K_LRR	Chr02	gene	51188519	51192057	+	PF00560,PF08263,PF00069	GO:0005515,GO:0006468,GO:0005524,GO:0004672	NSP-interacting kinase 2	Eucgr.B03087.1.p	UP	Xiaohui	R. solanacearum		2022	10.1007/s00438-022-01903-4	Singleton
Eucgr.B03231	RLK	Unknown	RLK_LRR-I	TM_K_MalecLike	Chr02	gene	54464062	54471024	-	PF07714,PF12819	GO:0006468,GO:0004672	Leucine-rich repeat protein kinase family protein	Eucgr.B03231.1.p							Singleton
Eucgr.B03306	RLK	Unknown	RLK_LRR-II	TM_K_LRR	Chr02	gene	53761242	53774626	+	PF13855,PF08263,PF00069	GO:0005515,GO:0006468,GO:0005524,GO:0004672	NSP-interacting kinase 3	Eucgr.B03306.1.p							Singleton
Eucgr.B03306	RLK	Unknown	RLK_LRR-II	TM_K_LRR	Chr02	gene	53761242	53774626	+	PF08263,PF00069	GO:0006468,GO:0005524,GO:0004672	NSP-interacting kinase 3	Eucgr.B03306.1.p							Singleton
Eucgr.B03474	RLP	Unknown	RLP_LRR	TM_LRR	Chr02	gene	54772364	54775383	-	PF08263,PF00560,PF13855	GO:0005515	disease resistance family protein / LRR family protein	Eucgr.B03474.1.p	DOWN	Xiaohui	R. solanacearum		2022	10.1007/s00438-022-01903-4	Cluster 14
Eucgr.B03475	RLP	Unknown	RLP_LRR	TM_LRR	Chr02	gene	54789104	54791905	-	PF08263,PF00560	GO:0005515	disease resistance family protein / LRR family protein	Eucgr.B03475.1.p	UP	Xiaohui	R. solanacearum		2022	10.1007/s00438-022-01903-4	Cluster 14
Eucgr.B03475	RLP	Unknown	RLP_LRR	TM_LRR	Chr02	gene	54789104	54791905	-	PF08263,PF00560	GO:0005515	disease resistance family protein / LRR family protein	Eucgr.B03475.1.p	UP	Mangwanda	C. austroafricana	Resistent	2015	10.1186/s12864-015-1529-x	Cluster 14
Eucgr.B03475	RLP	Unknown	RLP_LRR	TM_LRR	Chr02	gene	54789104	54791905	-	PF08263,PF00560	GO:0005515	disease resistance family protein / LRR family protein	Eucgr.B03475.1.p	UP	Mangwanda	C. austroafricana	Susceptible	2015	10.1186/s12864-015-1529-x	Cluster 14
Eucgr.B03476	RLP	Unknown	RLP_LRR	TM_LRR	Chr02	gene	54800098	54803252	-	PF08263,PF00560,PF13855	GO:0005515	disease resistance family protein / LRR family protein	Eucgr.B03476.1.p	DOWN	Xiaohui	R. solanacearum		2022	10.1007/s00438-022-01903-4	Cluster 14
Eucgr.B03477	RLK	Unknown	RLK_LRR-XII	TM_K	Chr02	gene	54821391	54823403	-	PF00069	GO:0006468,GO:0005524,GO:0004672	Leucine-rich repeat protein kinase family protein	Eucgr.B03477.1.p							Cluster 14
Eucgr.C00242	RLK	Unknown	RLK_LRR-XII	TM_LRR	Chr03	gene	2040961	2044606	+	PF08263,PF13855,PF07714	GO:0005515,GO:0006468,GO:0004672	Leucine-rich receptor-like protein kinase family protein	Eucgr.C00242.1.p							Singleton
Eucgr.C00264	RLK	Unknown	RLK_LRR-XII	TM_K	Chr03	gene	9442802	9445519	+	PF00069	GO:0006468,GO:0005524,GO:0004672	Leucine-rich repeat protein kinase family protein	Eucgr.C00264.1.p							Cluster 15
Eucgr.C00269	RLK	Unknown	RLK_LRR-XII	TM_K_LRR	Chr03	gene	9489792	9492955	+	PF00560,PF13855,PF00069	GO:0005515,GO:0006468,GO:0005524,GO:0004672	Leucine-rich repeat protein kinase family protein	Eucgr.C00269.1.p							Cluster 15
Eucgr.C00351	RLK	Unknown	RLK_LRR-VII	TM_K_LRR	Chr03	gene	5775472	5778735	-	PF07714,PF13855	GO:0006468,GO:0004672,GO:0005515	Leucine-rich repeat protein kinase family protein	Eucgr.C00351.1.p							Singleton
Eucgr.C00408	RLK	Unknown	RLK_LRR-XIV	TM_K_LRR	Chr03	gene	6506718	6510644	-	PF08263,PF07714,PF13855	GO:0006468,GO:0004672,GO:0005515	Leucine-rich repeat protein kinase family protein	Eucgr.C00408.1.p							Singleton
Eucgr.C00557	RLK	Unknown	RLK_LRR-XI	TM_K_LRR	Chr03	gene	8836959	8840370	+	PF08263,PF00560,PF13855,PF00069	GO:0005515,GO:0006468,GO:0005524,GO:0004672	Protein kinase family protein with leucine-rich repeat domain	Eucgr.C00557.1.p							Cluster 15
Eucgr.C00558	RLK	Unknown	RLK_LRR-XI	TM_K_LRR	Chr03	gene	8847359	8850825	+	PF08263,PF13855,PF00069	GO:0005515,GO:0006468,GO:0005524,GO:0004672	Protein kinase family protein with leucine-rich repeat domain	Eucgr.C00558.1.p	UP	Xiaohui	R. solanacearum		2022	10.1007/s00438-022-01903-4	Cluster 15
Eucgr.C00558	RLK	Unknown	RLK_LRR-XI	TM_K_LRR	Chr03	gene	8847359	8850825	+	PF08263,PF13855,PF00069	GO:0005515,GO:0006468,GO:0005524,GO:0004672	Protein kinase family protein with leucine-rich repeat domain	Eucgr.C00558.1.p	DOWN	Xiaohui	R. solanacearum		2022	10.1007/s00438-022-01903-4	Cluster 15
Eucgr.C00558	RLK	Unknown	RLK_LRR-XI	TM_K_LRR	Chr03	gene	8847359	8850825	+	PF08263,PF13855,PF00069	GO:0005515,GO:0006468,GO:0005524,GO:0004672	Protein kinase family protein with leucine-rich repeat domain	Eucgr.C00558.1.p	UP	Mangwanda	C. austroafricana	Susceptible	2015	10.1186/s12864-015-1529-x	Cluster 15
Eucgr.C00560	RLK	Unknown	RLK_LRR-XI	TM_K_LRR	Chr03	gene	8878702	8882023	+	PF00560,PF00069	GO:0005515,GO:0006468,GO:0005524,GO:0004672	Protein kinase family protein with leucine-rich repeat domain	Eucgr.C00560.1.p	UP	Mangwanda	C. austroafricana	Resistent	2015	10.1186/s12864-015-1529-x	Cluster 15
Eucgr.C00561	RLK	Unknown	RLK_LRR-XI	TM_K_LRR	Chr03	gene	8909672	8912699	+	PF00560,PF00069	GO:0005515,GO:0006468,GO:0005524,GO:0004672	Protein kinase family protein with leucine-rich repeat domain	Eucgr.C00561.1.p	UP	Santos	A. psidii	Susceptible	2020	10.1007/s11103-020-01030-x	Cluster 15
Eucgr.C00562	RLK	Unknown	RLK_LRR-XI	TM_K_LRR	Chr03	gene	9005136	9008549	+	PF00560,PF13855,PF00069	GO:0005515,GO:0006468,GO:0005524,GO:0004672	Protein kinase family protein with leucine-rich repeat domain	Eucgr.C00562.1.p	DOWN	Xiaohui	R. solanacearum		2022	10.1007/s00438-022-01903-4	Cluster 15
Eucgr.C00563	RLK	Unknown	RLK_LRR-XI	TM_K_LRR	Chr03	gene	9014973	9019056	+	PF08263,PF00560,PF00069,PF13855	GO:0005515,GO:0006468,GO:0005524,GO:0004672	Protein kinase family protein with leucine-rich repeat domain	Eucgr.C00563.1.p							Cluster 15
Eucgr.C00564	RLK	Unknown	RLK_LRR-XI	TM_K_LRR	Chr03	gene	9064496	9068136	+	PF00560,PF13855,PF00069	GO:0005515,GO:0006468,GO:0005524,GO:0004672	Protein kinase family protein with leucine-rich repeat domain	Eucgr.C00564.1.p	UP	Santos	A. psidii	Susceptible	2020	10.1007/s11103-020-01030-x	Cluster 15
Eucgr.C00565	RLK	Unknown	RLK_LRR-XI	TM_LRR	Chr03	gene	9244474	9246405	+	PF00560,PF00069	GO:0005515,GO:0006468,GO:0005524,GO:0004672	Protein kinase family protein with leucine-rich repeat domain	Eucgr.C00565.1.p							Cluster 15
Eucgr.C00631	RLK	Unknown	RLK_LRR-XII	TM_K_LRR	Chr03	gene	11699816	11703231	-	PF08263,PF13855,PF00069	GO:0005515,GO:0006468,GO:0005524,GO:0004672	Leucine-rich repeat protein kinase family protein	Eucgr.C00631.1.p							Singleton
Eucgr.C00734	RLP	Unknown	RLP_LRR	TM_LRR	Chr03	gene	12662668	12666361	-	PF08263,PF00560,PF13855	GO:0005515	disease resistance family protein / LRR family protein	Eucgr.C00734.1.p							Singleton
Eucgr.C00787	RLK	Unknown	RLK_LRR-III	TM_K_LRR	Chr03	gene	13243297	13245801	+	PF00560,PF08263,PF13855,PF00069	GO:0005515,GO:0006468,GO:0005524,GO:0004672	Leucine-rich repeat protein kinase family protein	Eucgr.C00787.1.p							Singleton
Eucgr.C00943	RLK	Unknown	RLK_LRR-I	TM_K_LRR	Chr03	gene	14863179	14868515	+	PF13855,PF07714,PF12819	GO:0005515,GO:0006468,GO:0004672	Leucine-rich repeat transmembrane protein kinase protein	Eucgr.C00943.1.p	UP	Santos	A. psidii	Susceptible	2020	10.1007/s11103-020-01030-x	Singleton
Eucgr.C00943	RLK	Unknown	RLK_LRR-I	TM_K_LRR	Chr03	gene	14863179	14868515	+	PF13855,PF07714,PF12819	GO:0005515,GO:0006468,GO:0004672	Leucine-rich repeat transmembrane protein kinase protein	Eucgr.C00943.1.p	UP	Mangwanda	C. austroafricana	Resistent	2015	10.1186/s12864-015-1529-x	Singleton
Eucgr.C00966	RLK	Unknown	RLK_LRR-XI	TM_K	Chr03	gene	15133534	15136093	-	PF00560,PF00069	GO:0005515,GO:0006468,GO:0005524,GO:0004672	Protein kinase family protein with leucine-rich repeat domain	Eucgr.C00966.1.p	UP	Santos	A. psidii	Susceptible	2020	10.1007/s11103-020-01030-x	Cluster 16
Eucgr.C00967	RLK	Unknown	RLK_LRR-XI	TM_K_LRR	Chr03	gene	15172274	15175467	-	PF08263,PF00560,PF00069	GO:0005515,GO:0006468,GO:0005524,GO:0004672	Protein kinase family protein with leucine-rich repeat domain	Eucgr.C00967.1.p	DOWN	Xiaohui	R. solanacearum		2022	10.1007/s00438-022-01903-4	Cluster 16
Eucgr.C00967	RLK	Unknown	RLK_LRR-XI	TM_K_LRR	Chr03	gene	15172274	15175467	-	PF08263,PF00560,PF00069	GO:0005515,GO:0006468,GO:0005524,GO:0004672	Protein kinase family protein with leucine-rich repeat domain	Eucgr.C00967.1.p	UP	Mangwanda	C. austroafricana	Resistent	2015	10.1186/s12864-015-1529-x	Cluster 16
Eucgr.C00970	RLK	Unknown	RLK_LRR-XI	TM_K_LRR	Chr03	gene	15303158	15306422	-	PF08263,PF13855,PF00069	GO:0005515,GO:0006468,GO:0005524,GO:0004672	Protein kinase family protein with leucine-rich repeat domain	Eucgr.C00970.1.p	DOWN	Xiaohui	R. solanacearum		2022	10.1007/s00438-022-01903-4	Cluster 16
Eucgr.C00974	RLK	Unknown	RLK_LRR-XI	TM_K_LRR	Chr03	gene	15492177	15495642	-	PF00560,PF13855,PF00069	GO:0005515,GO:0006468,GO:0005524,GO:0004672	Protein kinase family protein with leucine-rich repeat domain	Eucgr.C00974.1.p	UP	Mangwanda	C. austroafricana	Resistent	2015	10.1186/s12864-015-1529-x	Cluster 16
Eucgr.C00979	RLK	Unknown	RLK_LRR-XI	TM_K_LRR	Chr03	gene	15639315	15642416	-	PF08263,PF00560,PF13855,PF00069	GO:0005515,GO:0006468,GO:0005524,GO:0004672	Protein kinase family protein with leucine-rich repeat domain	Eucgr.C00979.1.p							Cluster 16
Eucgr.C00981	RLP	Unknown	RLP_LRR	TM_LRR	Chr03	gene	15736029	15738020	-	PF00560,PF13855	GO:0005515	Protein kinase family protein with leucine-rich repeat domain	Eucgr.C00981.1.p							Cluster 16
Eucgr.C00984	RLK	Unknown	RLK_LRR-XI	TM_K_LRR	Chr03	gene	15768031	15771767	-	PF08263,PF13855,PF00069	GO:0005515,GO:0006468,GO:0005524,GO:0004672	Protein kinase family protein with leucine-rich repeat domain	Eucgr.C00984.1.p	UP	Santos	A. psidii	Susceptible	2020	10.1007/s11103-020-01030-x	Cluster 16
Eucgr.C00984	RLK	Unknown	RLK_LRR-XI	TM_K_LRR	Chr03	gene	15768031	15771767	-	PF08263,PF13855,PF00069	GO:0005515,GO:0006468,GO:0005524,GO:0004672	Protein kinase family protein with leucine-rich repeat domain	Eucgr.C00984.1.p	UP	Xiaohui	R. solanacearum		2022	10.1007/s00438-022-01903-4	Cluster 16
Eucgr.C00984	RLK	Unknown	RLK_LRR-XI	TM_K_LRR	Chr03	gene	15768031	15771767	-	PF08263,PF13855,PF00069	GO:0005515,GO:0006468,GO:0005524,GO:0004672	Protein kinase family protein with leucine-rich repeat domain	Eucgr.C00984.1.p	UP	Mangwanda	C. austroafricana	Resistent	2015	10.1186/s12864-015-1529-x	Cluster 16
Eucgr.C00984	RLK	Unknown	RLK_LRR-XI	TM_K_LRR	Chr03	gene	15768031	15771767	-	PF08263,PF13855,PF00069	GO:0005515,GO:0006468,GO:0005524,GO:0004672	Protein kinase family protein with leucine-rich repeat domain	Eucgr.C00984.1.p	UP	Mangwanda	C. austroafricana	Susceptible	2015	10.1186/s12864-015-1529-x	Cluster 16
Eucgr.C00986	RLK	Unknown	RLK_LRR-XI	TM_K_LRR	Chr03	gene	15777306	15780744	-	PF00560,PF13855,PF00069	GO:0005515,GO:0006468,GO:0005524,GO:0004672	Protein kinase family protein with leucine-rich repeat domain	Eucgr.C00986.1.p	UP	Santos	A. psidii	Susceptible	2020	10.1007/s11103-020-01030-x	Cluster 16
Eucgr.C00986	RLK	Unknown	RLK_LRR-XI	TM_K_LRR	Chr03	gene	15777306	15780744	-	PF00560,PF13855,PF00069	GO:0005515,GO:0006468,GO:0005524,GO:0004672	Protein kinase family protein with leucine-rich repeat domain	Eucgr.C00986.1.p	DOWN	Xiaohui	R. solanacearum		2022	10.1007/s00438-022-01903-4	Cluster 16
Eucgr.C00987	RLK	Unknown	RLK_LRR-XI	TM_K_LRR	Chr03	gene	15800535	15804459	-	PF00560,PF13855,PF00069	GO:0005515,GO:0006468,GO:0005524,GO:0004672	Protein kinase family protein with leucine-rich repeat domain	Eucgr.C00987.1.p	DOWN	Xiaohui	R. solanacearum		2022	10.1007/s00438-022-01903-4	Cluster 16
Eucgr.C00987	RLK	Unknown	RLK_LRR-XI	TM_K_LRR	Chr03	gene	15800535	15804459	-	PF00560,PF13855,PF00069	GO:0005515,GO:0006468,GO:0005524,GO:0004672	Protein kinase family protein with leucine-rich repeat domain	Eucgr.C00987.1.p	UP	Mangwanda	C. austroafricana	Resistent	2015	10.1186/s12864-015-1529-x	Cluster 16
Eucgr.C00988	RLK	Unknown	RLK_LRR-XI	TM_K_LRR	Chr03	gene	15811382	15815568	-	PF00560,PF13855,PF00069	GO:0005515,GO:0006468,GO:0005524,GO:0004672	Protein kinase family protein with leucine-rich repeat domain	Eucgr.C00988.1.p	UP	Santos	A. psidii	Susceptible	2020	10.1007/s11103-020-01030-x	Cluster 16
Eucgr.C00989	RLK	Unknown	RLK_LRR-XI	TM_K_LRR	Chr03	gene	15825260	15828200	-	PF08263,PF00560,PF13855,PF00069	GO:0005515,GO:0006468,GO:0005524,GO:0004672	Protein kinase family protein with leucine-rich repeat domain	Eucgr.C00989.1.p							Cluster 16
Eucgr.C00991	RLP	Unknown	RLP_LRR	TM_LRR	Chr03	gene	15902614	15904788	-	PF08263,PF00560,PF13855	GO:0005515	Protein kinase family protein with leucine-rich repeat domain	Eucgr.C00991.1.p	UP	Mangwanda	C. austroafricana	Resistent	2015	10.1186/s12864-015-1529-x	Cluster 16
Eucgr.C00991	RLP	Unknown	RLP_LRR	TM_LRR	Chr03	gene	15902614	15904788	-	PF08263,PF00560,PF13855	GO:0005515	Protein kinase family protein with leucine-rich repeat domain	Eucgr.C00991.1.p	UP	Santos	A. psidii	Susceptible	2020	10.1007/s11103-020-01030-x	Cluster 16
Eucgr.C00993	RLP	Unknown	RLP_LRR	TM_LRR	Chr03	gene	15966863	15969521	-	PF08263,PF13855	GO:0005515	Protein kinase family protein with leucine-rich repeat domain	Eucgr.C00993.1.p	UP	Mangwanda	C. austroafricana	Resistent	2015	10.1186/s12864-015-1529-x	Cluster 16
Eucgr.C00993	RLP	Unknown	RLP_LRR	TM_LRR	Chr03	gene	15966863	15969521	-	PF08263,PF13855	GO:0005515	Protein kinase family protein with leucine-rich repeat domain	Eucgr.C00993.1.p	DOWN	Oates	L. invasa	Resistent	2015	10.1093/pcp/pcv064	Cluster 16
Eucgr.C01100	RLK	Unknown	RLK_LRR-III	TM_K_LRR	Chr03	gene	17769080	17773267	+	PF00560,PF08263,PF00069	GO:0005515,GO:0006468,GO:0005524,GO:0004672	Leucine-rich repeat protein kinase family protein	Eucgr.C01100.1.p							Singleton
Eucgr.C01182	RLK	Unknown	RLK_LRR-XII	TM_K_LRR	Chr03	gene	18719624	18724346	-	PF08263,PF13855,PF00069	GO:0005515,GO:0006468,GO:0005524,GO:0004672	Protein kinase family protein with leucine-rich repeat domain	Eucgr.C01182.1.p	DOWN	Mangwanda	C. austroafricana	Resistent	2015	10.1186/s12864-015-1529-x	Cluster 17
Eucgr.C01183	RLK	Unknown	RLK_LRR-XII	TM_K_LRR	Chr03	gene	18741166	18746100	-	PF08263,PF00069,PF13855	GO:0006468,GO:0005524,GO:0004672,GO:0005515	Leucine-rich repeat receptor-like protein kinase family protein	Eucgr.C01183.1.p							Cluster 17
Eucgr.C01185	RLK	Unknown	RLK_LRR-XI	TM_K_LRR	Chr03	gene	18765714	18770348	-	PF08263,PF00560,PF13855,PF00069	GO:0005515,GO:0006468,GO:0005524,GO:0004672	Leucine-rich repeat receptor-like protein kinase family protein	Eucgr.C01185.1.p	DOWN	Mangwanda	C. austroafricana	Susceptible	2015	10.1186/s12864-015-1529-x	Cluster 17
Eucgr.C01237	RLK	Unknown	RLK_LRR-II	TM_K_LRR	Chr03	gene	48562046	48566623	-	PF13855,PF08263,PF00069	GO:0005515,GO:0006468,GO:0005524,GO:0004672	Leucine-rich repeat protein kinase family protein	Eucgr.C01237.1.p							Singleton
Eucgr.C01475	RLK	Unknown	RLK_LRR-XII	TM_K_LRR	Chr03	gene	21860264	21863059	+	PF13855,PF00069	GO:0005515,GO:0006468,GO:0005524,GO:0004672	Leucine-rich repeat protein kinase family protein	Eucgr.C01475.1.p							Singleton
Eucgr.C01503	RLK	Unknown	RLK_LRR-XII	TM_K_LRR	Chr03	gene	21445970	21449193	+	PF13855,PF07714	GO:0005515,GO:0006468,GO:0004672	Leucine-rich repeat protein kinase family protein	Eucgr.C01503.1.p							Singleton
Eucgr.C01534	RLK	Unknown	RLK_LRR-XII	TM_K_LRR	Chr03	gene	20897120	20901458	-	PF08263,PF00560,PF13855,PF00069	GO:0005515,GO:0006468,GO:0005524,GO:0004672	Leucine-rich repeat receptor-like protein kinase family protein	Eucgr.C01534.1.p							Singleton
Eucgr.C01538	RLK	Unknown	RLK_LRR-XII	TM_K_LRR	Chr03	gene	27483872	27486999	+	PF00560,PF08263,PF07714	GO:0005515,GO:0006468,GO:0004672	EF-TU receptor	Eucgr.C01538.1.p							Singleton
Eucgr.C01547	RLK	Unknown	RLK_LRR-XII	TM_K	Chr03	gene	27225711	27228077	+	PF00560,PF00069	GO:0005515,GO:0006468,GO:0005524,GO:0004672	Leucine-rich repeat protein kinase family protein	Eucgr.C01547.1.p							Singleton
Eucgr.C01556	RLK	Unknown	RLK_LRR-XII	TM_K_LRR	Chr03	gene	26972152	26975062	+	PF08263,PF00560,PF13855,PF00069	GO:0005515,GO:0006468,GO:0005524,GO:0004672	Leucine-rich repeat protein kinase family protein	Eucgr.C01556.1.p							Singleton
Eucgr.C01567	RLK	Unknown	RLK_LRR-XII	TM_K_LRR	Chr03	gene	26496753	26499795	+	PF08263,PF00560,PF13855,PF07714	GO:0005515,GO:0006468,GO:0004672	Leucine-rich repeat protein kinase family protein	Eucgr.C01567.1.p							Cluster 18
Eucgr.C01568	RLK	Unknown	RLK_LRR-XII	TM_K_LRR	Chr03	gene	26444565	26447571	+	PF08263,PF00560,PF13855,PF00069	GO:0005515,GO:0006468,GO:0005524,GO:0004672	Leucine-rich repeat protein kinase family protein	Eucgr.C01568.1.p							Cluster 18
Eucgr.C01820	RLK	Unknown	RLK_LRR-XII	TM_K_LRR	Chr03	gene	28142355	28145356	+	PF08263,PF00560,PF00069	GO:0005515,GO:0006468,GO:0005524,GO:0004672	Leucine-rich repeat protein kinase family protein	Eucgr.C01820.1.p							Cluster 19
Eucgr.C01822	RLK	Unknown	RLK_LRR-XII	TM_K_LRR	Chr03	gene	28092783	28095879	+	PF08263,PF00560,PF13855,PF00069	GO:0005515,GO:0006468,GO:0005524,GO:0004672	Leucine-rich repeat protein kinase family protein	Eucgr.C01822.1.p							Cluster 19
Eucgr.C01824	RLK	Unknown	RLK_LRR-XII	TM_K	Chr03	gene	27981379	27984255	+	PF00560,PF00069	GO:0005515,GO:0006468,GO:0005524,GO:0004672	Leucine-rich repeat protein kinase family protein	Eucgr.C01824.1.p							Cluster 19
Eucgr.C01825	RLK	Unknown	RLK_LRR-XII	TM_K_LRR	Chr03	gene	27969126	27972215	+	PF00560,PF13855,PF00069	GO:0005515,GO:0006468,GO:0005524,GO:0004672	Leucine-rich repeat protein kinase family protein	Eucgr.C01825.1.p	DOWN	Mangwanda	C. austroafricana	Resistent	2015	10.1186/s12864-015-1529-x	Cluster 19
Eucgr.C01826	RLK	Unknown	RLP_LRR	TM_LRR	Chr03	gene	27923732	27926062	+	PF08263,PF00069,PF00560	GO:0006468,GO:0005524,GO:0004672,GO:0005515	EF-TU receptor	Eucgr.C01826.1.p							Cluster 19
Eucgr.C01828	RLK	Unknown	RLK_LRR-XII	TM_K_LRR	Chr03	gene	27910496	27913418	+	PF08263,PF00560,PF00069	GO:0005515,GO:0006468,GO:0005524,GO:0004672	Leucine-rich repeat protein kinase family protein	Eucgr.C01828.1.p							Cluster 19
Eucgr.C01832	RLK	Unknown	RLK_LRR-XII	TM_K_LRR	Chr03	gene	27799545	27802781	+	PF08263,PF00560,PF00069	GO:0005515,GO:0006468,GO:0005524,GO:0004672	Leucine-rich repeat protein kinase family protein	Eucgr.C01832.1.p							Cluster 19
Eucgr.C02169	RLK	Unknown	RLK_LRR-XII	TM_K_LRR	Chr03	gene	40323649	40326715	-	PF00560,PF08263,PF13855,PF00069	GO:0005515,GO:0006468,GO:0005524,GO:0004672	Leucine-rich repeat protein kinase family protein	Eucgr.C02169.1.p							Cluster 20
Eucgr.C02173	RLK	Unknown	RLK_LRR-III	TM_K_LRR	Chr03	gene	40421510	40424845	+	PF08263,PF13855,PF00069	GO:0005515,GO:0006468,GO:0005524,GO:0004672	Leucine-rich repeat protein kinase family protein	Eucgr.C02173.1.p							Cluster 20
Eucgr.C02281	RLK	Unknown	RLK_LRR-XII	TM_K_LRR	Chr03	gene	45695116	45698124	-	PF08263,PF00560,PF00069,PF13855	GO:0005515,GO:0006468,GO:0005524,GO:0004672	Leucine-rich receptor-like protein kinase family protein	Eucgr.C02281.1.p	UP	Xiaohui	R. solanacearum		2022	10.1007/s00438-022-01903-4	Cluster 21
Eucgr.C02282	RLK	Unknown	RLK_LRR-XII	TM_K_LRR	Chr03	gene	45659141	45662618	-	PF08263,PF00560,PF13855,PF07714	GO:0005515,GO:0006468,GO:0004672	Leucine-rich receptor-like protein kinase family protein	Eucgr.C02282.1.p							Cluster 21
Eucgr.C02328	RLK	Unknown	RLK_LRR-XII	TM_K_LRR	Chr03	gene	44931592	44935108	+	PF08263,PF00560,PF07714	GO:0005515,GO:0006468,GO:0004672	Leucine-rich repeat protein kinase family protein	Eucgr.C02328.1.p							Singleton
Eucgr.C02460	RLK	Unknown	RLK_LRR-XII	TM_K_LRR	Chr03	gene	46042259	46046183	-	PF08263,PF00560,PF13855,PF00069	GO:0005515,GO:0006468,GO:0005524,GO:0004672	Leucine-rich repeat receptor-like protein kinase family protein	Eucgr.C02460.1.p	DOWN	Mangwanda	C. austroafricana	Resistent	2015	10.1186/s12864-015-1529-x	Singleton
Eucgr.C02500	RLK	Unknown	RLK_LRR-XII	TM_K	Chr03	gene	49928619	49930905	-	PF00560,PF13855,PF00069	GO:0005515,GO:0006468,GO:0005524,GO:0004672	Leucine-rich repeat receptor-like protein kinase family protein	Eucgr.C02500.1.p							Singleton
Eucgr.C02938	RLK	Unknown	RLK_LRR-XI	TM_K_LRR	Chr03	gene	58983861	58987932	-	PF08263,PF00560,PF07714,PF13855	GO:0005515,GO:0006468,GO:0004672	Leucine-rich receptor-like protein kinase family protein	Eucgr.C02938.1.p							Singleton
Eucgr.C02985	RLK	Unknown	RLK_LRR-XI	TM_K_LRR	Chr03	gene	60261968	60265269	+	PF13855,PF00069	GO:0005515,GO:0006468,GO:0005524,GO:0004672	Protein kinase family protein with leucine-rich repeat domain	Eucgr.C02985.1.p	UP	Mangwanda	C. austroafricana	Resistent	2015	10.1186/s12864-015-1529-x	Singleton
Eucgr.C03265	RLP	Unknown	RLP_LRR	TM_LRR	Chr03	gene	67454064	67458554	-	PF00560,PF13855	GO:0005515	receptor like protein 15	Eucgr.C03265.1.p							Singleton
Eucgr.C03523	RLK	Unknown	RLP_LRR	TM_LRR	Chr03	gene	68958567	68962061	+	PF08263,PF13855	GO:0005515	Leucine-rich repeat protein kinase family protein	Eucgr.C03523.1.p							Singleton
Eucgr.C03669	RLK	Unknown	RLK_LRR-XII	TM_K_LRR	Chr03	gene	75045513	75047862	+	PF13855,PF00069	GO:0005515,GO:0006468,GO:0005524,GO:0004672	Leucine-rich repeat receptor-like protein kinase family protein	Eucgr.C03669.1.p							Cluster 23
Eucgr.C03670	RLK	Unknown	RLK_LRR-XII	TM_K_LRR	Chr03	gene	75075454	75077652	+	PF00560,PF13855,PF00069	GO:0005515,GO:0006468,GO:0005524,GO:0004672	Leucine-rich repeat receptor-like protein kinase family protein	Eucgr.C03670.1.p							Cluster 23
Eucgr.C03671	RLK	Unknown	RLK_LRR-XII	TM_K_LRR	Chr03	gene	75088067	75090786	+	PF13855,PF00069	GO:0005515,GO:0006468,GO:0005524,GO:0004672	Leucine-rich repeat receptor-like protein kinase family protein	Eucgr.C03671.1.p							Cluster 23
Eucgr.C03675	RLK	Unknown	RLK_LRR-XII	TM_K_LRR	Chr03	gene	75184599	75187808	+	PF00560,PF13855,PF00069	GO:0005515,GO:0006468,GO:0005524,GO:0004672	Leucine-rich repeat receptor-like protein kinase family protein	Eucgr.C03675.1.p							Cluster 23
Eucgr.C03678	RLK	Unknown	RLK_LRR-XII	TM_K_LRR	Chr03	gene	75264705	75267549	+	PF00560,PF13855,PF00069	GO:0005515,GO:0006468,GO:0005524,GO:0004672	Leucine-rich repeat receptor-like protein kinase family protein	Eucgr.C03678.1.p							Cluster 23
Eucgr.C03679	RLK	Unknown	RLK_LRR-XII	TM_K_LRR	Chr03	gene	75283822	75286984	+	PF00560,PF13855,PF00069	GO:0005515,GO:0006468,GO:0005524,GO:0004672	Leucine-rich repeat receptor-like protein kinase family protein	Eucgr.C03679.1.p							Cluster 23
Eucgr.C03686	RLK	Unknown	RLK_LRR-XII	TM_K_LRR	Chr03	gene	75366535	75369955	+	PF00560,PF13855,PF00069	GO:0005515,GO:0006468,GO:0005524,GO:0004672	Leucine-rich repeat receptor-like protein kinase family protein	Eucgr.C03686.1.p							Cluster 23
Eucgr.C03742	RLK	Unknown	RLK_LRR-XII	TM_K_LRR	Chr03	gene	75919958	75923596	+	PF08263,PF00560,PF07714,PF13855	GO:0005515,GO:0006468,GO:0004672	Leucine-rich repeat protein kinase family protein	Eucgr.C03742.1.p	UP	Santos	A. psidii	Susceptible	2020	10.1007/s11103-020-01030-x	Singleton
Eucgr.C03760	RLK	Unknown	RLK_LRR-XII	TM_K_LRR	Chr03	gene	76127521	76131146	+	PF08263,PF00560,PF00069,PF13855	GO:0005515,GO:0006468,GO:0005524,GO:0004672	Leucine-rich receptor-like protein kinase family protein	Eucgr.C03760.1.p	DOWN	Mangwanda	C. austroafricana	Susceptible	2015	10.1186/s12864-015-1529-x	Singleton
Eucgr.C03760	RLK	Unknown	RLK_LRR-XII	TM_K_LRR	Chr03	gene	76127521	76131146	+	PF08263,PF00560,PF00069,PF13855	GO:0005515,GO:0006468,GO:0005524,GO:0004672	Leucine-rich receptor-like protein kinase family protein	Eucgr.C03760.1.p	DOWN	Xiaohui	R. solanacearum		2022	10.1007/s00438-022-01903-4	Singleton
Eucgr.C03925	RLK	Unknown	RLK_LRR-XII	TM_K_LRR	Chr03	gene	74209398	74211418	+	PF00560,PF13855,PF00069	GO:0005515,GO:0006468,GO:0005524,GO:0004672	Leucine-rich repeat receptor-like protein kinase family protein	Eucgr.C03925.1.p							Cluster 22
Eucgr.C03926	RLK	Unknown	RLK_LRR-XII	TM_K_LRR	Chr03	gene	74156875	74160522	+	PF00560,PF00069,PF13855	GO:0005515,GO:0006468,GO:0005524,GO:0004672	Protein kinase family protein with leucine-rich repeat domain	Eucgr.C03926.1.p							Cluster 22
Eucgr.C03938	RLK	Unknown	RLK_LRR-XII	TM_K_LRR	Chr03	gene	74054896	74058741	+	PF00560,PF07714,PF13855	GO:0005515,GO:0006468,GO:0004672	Leucine-rich repeat receptor-like protein kinase family protein	Eucgr.C03938.1.p							Cluster 22
Eucgr.C03942	RLK	Unknown	RLK_LRR-XII	TM_K	Chr03	gene	74028103	74030433	+	PF00560,PF00069	GO:0005515,GO:0006468,GO:0005524,GO:0004672	Leucine-rich repeat receptor-like protein kinase family protein	Eucgr.C03942.1.p							Cluster 22
Eucgr.C04048	RLP	Unknown	RLP_LRR	TM_LRR	Chr03	gene	83190037	83192103	+	PF13855	GO:0005515	Leucine-rich receptor-like protein kinase family protein	Eucgr.C04048.1.p							Cluster 26
Eucgr.C04054	RLP	Unknown	RLP_LRR	TM	Chr03	gene	83115290	83116699	-	PF00560	GO:0005515	disease resistance family protein / LRR family protein	Eucgr.C04054.1.p							Cluster 26
Eucgr.C04067	RLP	Unknown	RLP_LRR	TM	Chr03	gene	82975261	82977954	+	PF00560	GO:0005515	receptor like protein 15	Eucgr.C04067.1.p							Cluster 26
Eucgr.C04070	RLP	Unknown	RLP_LRR	TM_LRR	Chr03	gene	82938631	82943492	+	PF00560,PF13855	GO:0005515	receptor like protein 56	Eucgr.C04070.1.p	DOWN	Oates	L. invasa	Resistent	2015	10.1093/pcp/pcv064	Cluster 26
Eucgr.C04071	RLP	Unknown	RLP_LRR	TM_LRR	Chr03	gene	82927925	82933426	+	PF13855	GO:0005515	receptor like protein 56	Eucgr.C04071.1.p							Cluster 26
Eucgr.C04075	RLP	Unknown	RLP_LRR	TM_LRR	Chr03	gene	82896167	82899832	+	PF00560,PF13855	GO:0005515	receptor like protein 13	Eucgr.C04075.1.p							Cluster 26
Eucgr.C04078	RLP	Unknown	RLP_LRR	TM_LRR	Chr03	gene	82866560	82871981	+	PF00560	GO:0005515	RNI-like superfamily protein	Eucgr.C04078.1.p							Cluster 26
Eucgr.C04112	RLP	Unknown	RLP_LRR	TM_LRR	Chr03	gene	82473286	82476192	+	PF13855	GO:0005515	receptor like protein 56	Eucgr.C04112.1.p	UP	Mangwanda	C. austroafricana	Resistent	2015	10.1186/s12864-015-1529-x	Cluster 25
Eucgr.C04151	RLK	Unknown	RLK_LRR-III	TM_K_LRR	Chr03	gene	78612614	78616852	+	PF00560,PF08263,PF07714	GO:0005515,GO:0006468,GO:0004672	Leucine-rich repeat protein kinase family protein	Eucgr.C04151.1.p	DOWN	Xiaohui	R. solanacearum		2022	10.1007/s00438-022-01903-4	Singleton
Eucgr.C04151	RLK	Unknown	RLK_LRR-III	TM_K_LRR	Chr03	gene	78612614	78616852	+	PF00560,PF08263,PF07714	GO:0005515,GO:0006468,GO:0004672	Leucine-rich repeat protein kinase family protein	Eucgr.C04151.1.p	UP	Xiaohui	R. solanacearum		2022	10.1007/s00438-022-01903-4	Singleton
Eucgr.C04282	RLP	Unknown	RLP_LRR	TM_LRR	Chr03	gene	80433851	80436316	+	PF00560	GO:0005515	receptor like protein 13	Eucgr.C04282.1.p							Cluster 24
Eucgr.C04284	RLP	Unknown	RLP_LRR	TM_LRR	Chr03	gene	80474000	80476132	+	PF00560,PF13855	GO:0005515	receptor like protein 13	Eucgr.C04284.1.p							Cluster 24
Eucgr.C04286	RLP	Unknown	RLP_LRR	TM_LRR	Chr03	gene	80505576	80508824	+	PF00560,PF13855	GO:0005515	receptor like protein 15	Eucgr.C04286.1.p							Cluster 24
Eucgr.C04290	RLP	Unknown	RLP_LRR	TM_LRR	Chr03	gene	80564917	80566978	+	PF00560,PF13855	GO:0005515	receptor like protein 56	Eucgr.C04290.1.p							Cluster 24
Eucgr.C04297	RLP	Unknown	RLP_LRR	TM_LRR	Chr03	gene	80686223	80688241	+	PF00560,PF13855	GO:0005515	receptor like protein 13	Eucgr.C04297.1.p							Cluster 24
Eucgr.C04300	RLP	Unknown	RLP_LRR	TM_LRR	Chr03	gene	80794574	80796846	+	PF00560	GO:0005515	receptor like protein 13	Eucgr.C04300.1.p							Cluster 24
Eucgr.C04303	RLP	Unknown	RLP_LRR	TM_LRR	Chr03	gene	80841551	80843704	+	PF00560,PF13855	GO:0005515	receptor like protein 15	Eucgr.C04303.1.p							Cluster 24
Eucgr.C04305	RLP	Unknown	RLP_LRR	TM_LRR	Chr03	gene	80864802	80866823	+	PF00560,PF13855	GO:0005515	receptor like protein 13	Eucgr.C04305.1.p							Cluster 24
Eucgr.C04311	RLP	Unknown	RLP_LRR	TM_LRR	Chr03	gene	80976857	80979446	+	PF13855	GO:0005515	receptor like protein 13	Eucgr.C04311.1.p							Cluster 24
Eucgr.C04312	RLP	Unknown	RLP_LRR	TM_LRR	Chr03	gene	81032457	81035030	+	PF00560,PF13855	GO:0005515	receptor like protein 13	Eucgr.C04312.1.p							Cluster 24
Eucgr.C04313	RLP	Unknown	RLP_LRR	TM_LRR	Chr03	gene	81089389	81091428	+	PF00560,PF13855	GO:0005515	receptor like protein 13	Eucgr.C04313.1.p							Cluster 24
Eucgr.C04317	RLP	Unknown	RLP_LRR	TM_LRR	Chr03	gene	81155997	81161874	+	PF00560,PF13855	GO:0005515	receptor like protein 15	Eucgr.C04317.1.p							Cluster 24
Eucgr.C04318	RLP	Unknown	RLP_LRR	TM_LRR	Chr03	gene	81202272	81204290	+	PF00560,PF13855	GO:0005515	receptor like protein 13	Eucgr.C04318.1.p	DOWN	Xiaohui	R. solanacearum		2022	10.1007/s00438-022-01903-4	Cluster 24
Eucgr.C04402	RLP	Unknown	RLP_LRR	TM_LRR	Chr03	gene	82189315	82193104	+	PF13855	GO:0005515	receptor like protein 13	Eucgr.C04402.2.p	UP	Mangwanda	C. austroafricana	Resistent	2015	10.1186/s12864-015-1529-x	Cluster 25
Eucgr.C04405	RLP	Unknown	RLP_LRR	TM_LRR	Chr03	gene	82207943	82213847	+	PF13855	GO:0005515	receptor like protein 15	Eucgr.C04405.1.p							Cluster 25
Eucgr.C04407	RLP	Unknown	RLP_LRR	TM_LRR	Chr03	gene	82235138	82239766	+	PF13855	GO:0005515	receptor like protein 15	Eucgr.C04407.1.p	DOWN	Oates	L. invasa	Resistent	2015	10.1093/pcp/pcv064	Cluster 25
Eucgr.C04412	RLP	Unknown	RLP_LRR	TM	Chr03	gene	82270542	82276072	+	PF00560	GO:0005515	receptor like protein 9	Eucgr.C04412.1.p							Cluster 25
Eucgr.C04416	RLP	Unknown	RLP_LRR	TM_LRR	Chr03	gene	82329903	82335452	+	PF13855	GO:0005515	receptor like protein 9	Eucgr.C04416.1.p							Cluster 25
Eucgr.C04419	RLP	Unknown	RLP_LRR	TM_LRR	Chr03	gene	82372086	82377296	+	PF00560,PF13855	GO:0005515	receptor like protein 15	Eucgr.C04419.1.p							Cluster 25
Eucgr.C04421	RLP	Unknown	RLP_LRR	TM_LRR	Chr03	gene	82390929	82395089	+	PF00560,PF13855	GO:0005515	receptor like protein 9	Eucgr.C04421.1.p							Cluster 25
Eucgr.D00003	RLK	Unknown	RLK_LRR-XI	TM_K_LRR	Chr04	gene	57544	61458	-	PF08263,PF00560,PF13855,PF00069	GO:0005515,GO:0006468,GO:0005524,GO:0004672	Leucine-rich repeat transmembrane protein kinase	Eucgr.D00003.1.p							Singleton
Eucgr.D00120	CLK	Unknown	RLK_LRR-XII	TM_K_LRR	Chr04	gene	2114130	2118319	-	PF00560,PF08263,PF00069,PF13855	GO:0005515,GO:0006468,GO:0005524,GO:0004672	Protein kinase family protein with leucine-rich repeat domain	Eucgr.D00120.1.p							Cluster 27
Eucgr.D00128	RLK	Unknown	RLK_LRR-III	TM_K_LRR	Chr04	gene	2290011	2295429	+	PF08263,PF00560,PF07714,PF13855	GO:0005515,GO:0006468,GO:0004672	Leucine-rich receptor-like protein kinase family protein	Eucgr.D00128.1.p							Cluster 27
Eucgr.D00237	RLK	Unknown	RLK_LRR-XII	TM_K_LRR	Chr04	gene	4024303	4027306	+	PF08263,PF13855,PF00069	GO:0005515,GO:0006468,GO:0005524,GO:0004672	Leucine-rich repeat protein kinase family protein	Eucgr.D00237.1.p							Cluster 28
Eucgr.D00239	RLK	Unknown	RLK_LRR-XII	TM_K_LRR	Chr04	gene	4076305	4079312	+	PF00560,PF08263,PF13855,PF00069	GO:0005515,GO:0006468,GO:0005524,GO:0004672	Leucine-rich repeat protein kinase family protein	Eucgr.D00239.1.p							Cluster 28
Eucgr.D00241	RLK	Unknown	RLK_LRR-XII	TM_K_LRR	Chr04	gene	4131630	4134179	+	PF08263,PF07714,PF13855	GO:0006468,GO:0004672,GO:0005515	Leucine-rich repeat protein kinase family protein	Eucgr.D00241.1.p							Cluster 28
Eucgr.D00318	RLK	Unknown	RLK_LRR-XII	TM_K_LRR	Chr04	gene	5496172	5500461	+	PF08263,PF00560,PF00069,PF13855	GO:0005515,GO:0006468,GO:0005524,GO:0004672	Leucine-rich receptor-like protein kinase family protein	Eucgr.D00318.1.p							Singleton
Eucgr.D00415	RLK	Unknown	RLK_LRR-VIII	TM_K_Malec	Chr04	gene	7833903	7844182	-	PF11721,PF07714	GO:0006468,GO:0004672	receptor-like kinase in flowers 1	Eucgr.D00415.1.p							Singleton
Eucgr.D00605	RLP	Unknown	RLP_LRR	TM_LRR_MalecLike	Chr04	gene	11399267	11407844	-	PF00560,PF11721	GO:0005515	receptor like protein 4	Eucgr.D00605.1.p							Singleton
Eucgr.D00672	RLP	Unknown	RLP_LRR	TM_LRR	Chr04	gene	12485992	12489102	+	PF08263,PF12799,PF13855	GO:0005515	disease resistance family protein / LRR family protein	Eucgr.D00672.1.p							Singleton
Eucgr.D01360	RLK	Unknown	RLK_LRR-V	TM_K_LRR	Chr04	gene	17426629	17432434	+	PF00560,PF08263,PF07714	GO:0005515,GO:0006468,GO:0004672	STRUBBELIG-receptor family 8	Eucgr.D01360.1.p							Singleton
Eucgr.D01360	RLK	Unknown	RLK_LRR-V	TM_K_LRR	Chr04	gene	17426629	17432434	+	PF00560,PF08263,PF00069	GO:0005515,GO:0006468,GO:0005524,GO:0004672	STRUBBELIG-receptor family 8	Eucgr.D01360.1.p							Singleton
Eucgr.D01480	RLK	Unknown	RLK_LRR-XII	TM_K_LRR	Chr04	gene	28482326	28485425	-	PF00560,PF08263,PF07714	GO:0005515,GO:0006468,GO:0004672	Leucine-rich repeat protein kinase family protein	Eucgr.D01480.1.p							Cluster 29
Eucgr.D01482	RLK	Unknown	RLK_LRR-XII	TM_K_LRR	Chr04	gene	28315379	28318379	-	PF00560,PF07714,PF13855	GO:0005515,GO:0006468,GO:0004672	Leucine-rich repeat protein kinase family protein	Eucgr.D01482.1.p							Cluster 29
Eucgr.D01545	RLK	Unknown	RLK_LRR-XII	TM_K_LRR	Chr04	gene	29249967	29254328	-	PF08263,PF00560,PF00069	GO:0005515,GO:0006468,GO:0005524,GO:0004672	Leucine-rich repeat protein kinase family protein	Eucgr.D01545.1.p							Cluster 30
Eucgr.D01548	RLK	Unknown	RLK_LRR-XII	TM_K_LRR	Chr04	gene	29287471	29291943	-	PF00560,PF08263,PF00069	GO:0005515,GO:0006468,GO:0005524,GO:0004672	Leucine-rich repeat protein kinase family protein	Eucgr.D01548.1.p							Cluster 30
Eucgr.D01551	RLK	Unknown	RLK_LRR-XII	TM_K_LRR	Chr04	gene	29382221	29386739	-	PF00560,PF08263,PF13855,PF00069	GO:0005515,GO:0006468,GO:0005524,GO:0004672	Leucine-rich repeat protein kinase family protein	Eucgr.D01551.1.p							Cluster 30
Eucgr.D01556	RLK	Unknown	RLK_LRR-XII	TM_K_LRR	Chr04	gene	29491658	29495944	-	PF13855,PF00069	GO:0005515,GO:0006468,GO:0005524,GO:0004672	Leucine-rich repeat protein kinase family protein	Eucgr.D01556.1.p							Cluster 30
Eucgr.D01557	RLK	Unknown	RLK_LRR-XII	TM_K_LRR	Chr04	gene	29536522	29540818	-	PF13855,PF07714	GO:0005515,GO:0006468,GO:0004672	Leucine-rich repeat protein kinase family protein	Eucgr.D01557.1.p							Cluster 30
Eucgr.D01559	RLK	Unknown	RLK_LRR-XII	TM_K_LRR	Chr04	gene	29563422	29568150	-	PF00560,PF08263,PF00069	GO:0005515,GO:0006468,GO:0005524,GO:0004672	Leucine-rich repeat protein kinase family protein	Eucgr.D01559.1.p							Cluster 30
Eucgr.D01564	RLK	Unknown	RLK_LRR-XII	TM_K_LRR	Chr04	gene	29628806	29631274	-	PF00069,PF13855	GO:0006468,GO:0005524,GO:0004672,GO:0005515	Leucine-rich repeat protein kinase family protein	Eucgr.D01564.1.p							Cluster 30
Eucgr.D01566	RLK	Unknown	RLK_LRR-XII	TM_K_LRR	Chr04	gene	29702266	29706794	-	PF08263,PF13855,PF00069	GO:0005515,GO:0006468,GO:0005524,GO:0004672	Leucine-rich repeat protein kinase family protein	Eucgr.D01566.1.p							Cluster 30
Eucgr.D01568	RLK	Unknown	RLK_LRR-XII	TM_K_LRR	Chr04	gene	29776421	29780812	-	PF08263,PF00560,PF07714,PF13855	GO:0005515,GO:0006468,GO:0004672	Leucine-rich repeat protein kinase family protein	Eucgr.D01568.1.p							Cluster 30
Eucgr.D01571	RLK	Unknown	RLK_LRR-XII	TM_K_LRR	Chr04	gene	29818953	29826424	-	PF08263,PF13855,PF00069	GO:0005515,GO:0006468,GO:0005524,GO:0004672	Leucine-rich repeat protein kinase family protein	Eucgr.D01571.1.p							Cluster 30
Eucgr.D01573	RLK	Unknown	RLK_LRR-XII	TM_K_LRR	Chr04	gene	29850062	29854463	-	PF08263,PF00560,PF13855,PF00069	GO:0005515,GO:0006468,GO:0005524,GO:0004672	Leucine-rich repeat protein kinase family protein	Eucgr.D01573.1.p							Cluster 30
Eucgr.D01777	RLK	Unknown	RLK_LRR-III	TM_K_LRR	Chr04	gene	31250451	31254480	-	PF00560,PF08263,PF13855,PF07714	GO:0005515,GO:0006468,GO:0004672	Leucine-rich repeat protein kinase family protein	Eucgr.D01777.1.p							Singleton
Eucgr.D01865	RLK	Unknown	RLK_LRR-VI	TM_K_LRR	Chr04	gene	32158078	32163121	-	PF08263,PF07714	GO:0006468,GO:0004672	Leucine-rich repeat protein kinase family protein	Eucgr.D01865.1.p							Singleton
Eucgr.D01962	RLK	Unknown	RLK_LRR-VII	TM_K_LRR	Chr04	gene	33253955	33257496	-	PF08263,PF13855,PF07714	GO:0005515,GO:0006468,GO:0004672	Leucine-rich repeat protein kinase family protein	Eucgr.D01962.1.p							Singleton
Eucgr.D02458	RLK	Unknown	RLK_LRR-IV	TM_K_LRR	Chr04	gene	38263017	38266614	-	PF08263,PF00069	GO:0006468,GO:0005524,GO:0004672	Leucine-rich repeat protein kinase family protein	Eucgr.D02458.1.p	UP	Xiaohui	R. solanacearum		2022	10.1007/s00438-022-01903-4	Singleton
Eucgr.D02582	RLK	Unknown	RLK_LRR-XIII	TM_K_LRR	Chr04	gene	39802476	39812001	-	PF08263,PF00069	GO:0006468,GO:0005524,GO:0004672	Leucine-rich repeat protein kinase family protein	Eucgr.D02582.1.p							Singleton
Eucgr.E00143	RLP	Unknown	RLP_LRR	TM_LRR	Chr05	gene	1564312	1568565	+	PF08263,PF00560,PF13855	GO:0005515	receptor like protein 7	Eucgr.E00143.2.p							Cluster 31
Eucgr.E00148	RLP	Unknown	RLP_LRR	TM_LRR	Chr05	gene	1622505	1626750	+	PF08263,PF00560,PF13855	GO:0005515	receptor like protein 7	Eucgr.E00148.1.p							Cluster 31
Eucgr.E00153	RLP	Unknown	RLP_LRR	TM_LRR	Chr05	gene	1669661	1674103	+	PF08263,PF00560,PF13855	GO:0005515	receptor like protein 19	Eucgr.E00153.1.p							Cluster 31
Eucgr.E00237	RLK	Unknown	RLK_LRR-XII	TM_K_LRR	Chr05	gene	2295455	2299021	-	PF08263,PF13855,PF00069	GO:0005515,GO:0006468,GO:0005524,GO:0004672	Leucine-rich repeat protein kinase family protein	Eucgr.E00237.1.p							Cluster 32
Eucgr.E00238	RLK	Unknown	RLK_LRR-XII	TM_K_LRR	Chr05	gene	2314906	2317795	-	PF00560,PF08263,PF00069	GO:0005515,GO:0006468,GO:0005524,GO:0004672	Leucine-rich repeat protein kinase family protein	Eucgr.E00238.1.p							Cluster 32
Eucgr.E00240	RLK	Unknown	RLK_LRR-XII	TM_K_LRR	Chr05	gene	2345033	2348111	-	PF08263,PF13855,PF00069	GO:0005515,GO:0006468,GO:0005524,GO:0004672	Leucine-rich repeat protein kinase family protein	Eucgr.E00240.1.p							Cluster 32
Eucgr.E00241	RLK	Unknown	RLK_LRR-XII	TM_K_LRR	Chr05	gene	2362672	2365693	-	PF00560,PF08263,PF13855,PF00069	GO:0005515,GO:0006468,GO:0005524,GO:0004672	Leucine-rich repeat protein kinase family protein	Eucgr.E00241.1.p	DOWN	Xiaohui	R. solanacearum		2022	10.1007/s00438-022-01903-4	Cluster 32
Eucgr.E00437	RLK	Unknown	RLK_LRR-XII	TM_LRR	Chr05	gene	4182914	4186172	+	PF08263,PF00560,PF00069,PF13855	GO:0005515,GO:0006468,GO:0005524,GO:0004672	Leucine-rich repeat protein kinase family protein	Eucgr.E00437.1.p	DOWN	Santos	A. psidii	Susceptible	2020	10.1007/s11103-020-01030-x	Cluster 33
Eucgr.E00437	RLK	Unknown	RLK_LRR-XII	TM_LRR	Chr05	gene	4182914	4186172	+	PF08263,PF00560,PF00069,PF13855	GO:0005515,GO:0006468,GO:0005524,GO:0004672	Leucine-rich repeat protein kinase family protein	Eucgr.E00437.1.p	UP	Xiaohui	R. solanacearum		2022	10.1007/s00438-022-01903-4	Cluster 33
Eucgr.E00438	RLK	Unknown	RLK_LRR-XII	TM_K_LRR	Chr05	gene	4191239	4194441	+	PF08263,PF00560,PF13855,PF00069	GO:0005515,GO:0006468,GO:0005524,GO:0004672	Leucine-rich repeat protein kinase family protein	Eucgr.E00438.1.p	DOWN	Oates	L. invasa	Resistent	2015	10.1093/pcp/pcv064	Cluster 33
Eucgr.E00438	RLK	Unknown	RLK_LRR-XII	TM_K_LRR	Chr05	gene	4191239	4194441	+	PF08263,PF00560,PF13855,PF00069	GO:0005515,GO:0006468,GO:0005524,GO:0004672	Leucine-rich repeat protein kinase family protein	Eucgr.E00438.1.p	DOWN	Xiaohui	R. solanacearum		2022	10.1007/s00438-022-01903-4	Cluster 33
Eucgr.E00442	RLK	Unknown	RLK_LRR-XII	TM_K_LRR	Chr05	gene	4222268	4225472	+	PF08263,PF00560,PF13855,PF00069	GO:0005515,GO:0006468,GO:0005524,GO:0004672	Leucine-rich repeat protein kinase family protein	Eucgr.E00442.1.p							Cluster 33
Eucgr.E00473	RLK	Unknown	RLK_LRR-IV	TM_K_LRR	Chr05	gene	4474215	4477478	+	PF08263,PF13855,PF00069	GO:0005515,GO:0006468,GO:0005524,GO:0004672	Leucine-rich repeat protein kinase family protein	Eucgr.E00473.1.p	DOWN	Xiaohui	R. solanacearum		2022	10.1007/s00438-022-01903-4	Singleton
Eucgr.E00832	RLK	Unknown	RLK_LRR-III	TM_K_LRR	Chr05	gene	8776964	8781081	+	PF00560,PF08263,PF13855,PF00069	GO:0005515,GO:0006468,GO:0005524,GO:0004672	Leucine-rich repeat protein kinase family protein	Eucgr.E00832.3.p	UP	Xiaohui	R. solanacearum		2022	10.1007/s00438-022-01903-4	Singleton
Eucgr.E01200	RLP	Unknown	RLP_LRR	TM_LRR	Chr05	gene	11797292	11800174	-	PF08263,PF13855	GO:0005515	receptor like protein 50	Eucgr.E01200.1.p							Singleton
Eucgr.E01227	RLP	Unknown	RLP_LRR	TM_LRR	Chr05	gene	12210731	12216187	-	PF08263,PF00560,PF13855	GO:0005515	receptor like protein 7	Eucgr.E01227.1.p							Cluster 34
Eucgr.E01238	RLP	Unknown	RLP_LRR	TM_LRR	Chr05	gene	12372497	12375533	+	PF08263,PF00560,PF13855	GO:0005515	receptor like protein 32	Eucgr.E01238.1.p							Cluster 34
Eucgr.E01370	RLP	Unknown	RLP_LRR	TM_LRR	Chr05	gene	14262897	14267040	-	PF00560,PF13855	GO:0005515	receptor like protein 6	Eucgr.E01370.1.p	DOWN	Oates	L. invasa	Resistent	2015	10.1093/pcp/pcv064	Cluster 35
Eucgr.E01374	RLP	Unknown	RLP_LRR	TM_LRR	Chr05	gene	14306562	14309776	-	PF08263,PF00560,PF13855	GO:0005515	receptor like protein 6	Eucgr.E01374.1.p	DOWN	Oates	L. invasa	Resistent	2015	10.1093/pcp/pcv064	Cluster 35
Eucgr.E01379	RLP	Unknown	RLP_LRR	TM_LRR	Chr05	gene	14341863	14344786	-	PF08263,PF00560,PF13855	GO:0005515	receptor like protein 32	Eucgr.E01379.1.p	DOWN	Oates	L. invasa	Resistent	2015	10.1093/pcp/pcv064	Cluster 35
Eucgr.E01380	RLP	Unknown	RLP_LRR	TM_LRR	Chr05	gene	14365255	14368261	-	PF08263,PF00560,PF13855	GO:0005515	receptor like protein 7	Eucgr.E01380.1.p							Cluster 35
Eucgr.E01397	RLP	Unknown	RLP_LRR	TM_LRR	Chr05	gene	14623803	14626646	-	PF08263,PF00560,PF13855	GO:0005515	receptor like protein 6	Eucgr.E01397.1.p	DOWN	Oates	L. invasa	Resistent	2015	10.1093/pcp/pcv064	Singleton
Eucgr.E01442	RLK	Unknown	RLK_LRR-IV	TM_K_LRR	Chr05	gene	15370579	15373660	-	PF00560,PF08263,PF00069	GO:0005515,GO:0006468,GO:0005524,GO:0004672	Leucine-rich repeat protein kinase family protein	Eucgr.E01442.1.p	UP	Mangwanda	C. austroafricana	Resistent	2015	10.1186/s12864-015-1529-x	Singleton
Eucgr.E01442	RLK	Unknown	RLK_LRR-IV	TM_K_LRR	Chr05	gene	15370579	15373660	-	PF00560,PF08263,PF00069	GO:0005515,GO:0006468,GO:0005524,GO:0004672	Leucine-rich repeat protein kinase family protein	Eucgr.E01442.1.p	DOWN	Xiaohui	R. solanacearum		2022	10.1007/s00438-022-01903-4	Singleton
Eucgr.E01607	RLK	Unknown	RLK_LRR-XII	TM_K_LRR	Chr05	gene	18107910	18111281	+	PF00560,PF08263,PF13855,PF00069	GO:0005515,GO:0006468,GO:0005524,GO:0004672	Leucine-rich repeat protein kinase family protein	Eucgr.E01607.1.p							Singleton
Eucgr.E01674	CLK	Unknown	RLK_LRR-XII	TM_K_LRR	Chr05	gene	20269356	20272407	-	PF00560,PF08263,PF00069,PF13855	GO:0005515,GO:0006468,GO:0005524,GO:0004672	Protein kinase family protein with leucine-rich repeat domain	Eucgr.E01674.1.p							Singleton
Eucgr.E01837	RLK	Unknown	RLK_LRR-XII	TM_K_LRR	Chr05	gene	23558550	23561626	+	PF00560,PF08263,PF13855,PF00069	GO:0005515,GO:0006468,GO:0005524,GO:0004672	Leucine-rich repeat protein kinase family protein	Eucgr.E01837.1.p							Cluster 36
Eucgr.E01842	RLK	Unknown	RLK_LRR-XII	TM_K_LRR	Chr05	gene	23677507	23681050	+	PF08263,PF00069,PF13855	GO:0006468,GO:0005524,GO:0004672,GO:0005515	Leucine-rich repeat protein kinase family protein	Eucgr.E01842.1.p							Cluster 36
Eucgr.E01853	RLK	Unknown	RLK_LRR-XII	TM_K_LRR	Chr05	gene	23845165	23848536	+	PF13855,PF00069	GO:0005515,GO:0006468,GO:0005524,GO:0004672	Leucine-rich repeat protein kinase family protein	Eucgr.E01853.1.p							Cluster 36
Eucgr.E02032	RLK	Unknown	RLK_LRR-XII	TM_K_LRR	Chr05	gene	27491740	27494788	-	PF00560,PF13855,PF00069	GO:0005515,GO:0006468,GO:0005524,GO:0004672	Leucine-rich repeat receptor-like protein kinase family protein	Eucgr.E02032.1.p	UP	Xiaohui	R. solanacearum		2022	10.1007/s00438-022-01903-4	Cluster 37
Eucgr.E02042	RLK	Unknown	RLK_LRR-XII	TM_K	Chr05	gene	27362684	27365466	-	PF00069	GO:0006468,GO:0005524,GO:0004672	Leucine-rich repeat receptor-like protein kinase family protein	Eucgr.E02042.1.p	UP	Xiaohui	R. solanacearum		2022	10.1007/s00438-022-01903-4	Cluster 37
Eucgr.E02042	RLK	Unknown	RLK_LRR-XII	TM_K	Chr05	gene	27362684	27365466	-	PF13855,PF00069	GO:0005515,GO:0006468,GO:0005524,GO:0004672	Leucine-rich repeat receptor-like protein kinase family protein	Eucgr.E02042.1.p	UP	Xiaohui	R. solanacearum		2022	10.1007/s00438-022-01903-4	Cluster 37
Eucgr.E02192	RLP	Unknown	RLP_LRR	TM_LRR	Chr05	gene	42590283	42592964	-	PF08263,PF00560,PF13855	GO:0005515	receptor like protein 7	Eucgr.E02192.1.p							Singleton
Eucgr.E02374	RLP	Unknown	RLP_LRR	TM_LRR	Chr05	gene	35022464	35024815	-	PF13855	GO:0005515	receptor like protein 33	Eucgr.E02374.1.p							Singleton
Eucgr.E02460	RLP	Unknown	RLP_LRR	TM_LRR	Chr05	gene	33432414	33434060	+	PF00560,PF13855	GO:0005515	receptor like protein 27	Eucgr.E02460.1.p	DOWN	Oates	L. invasa	Resistent	2015	10.1093/pcp/pcv064	Singleton
Eucgr.E02472	RLP	Unknown	RLP_LRR	TM_LRR	Chr05	gene	33217509	33220822	-	PF08263,PF00560,PF13855	GO:0005515	receptor like protein 7	Eucgr.E02472.1.p	DOWN	Mangwanda	C. austroafricana	Susceptible	2015	10.1186/s12864-015-1529-x	Singleton
Eucgr.E02472	RLP	Unknown	RLP_LRR	TM_LRR	Chr05	gene	33217509	33220822	-	PF08263,PF00560,PF13855	GO:0005515	receptor like protein 7	Eucgr.E02472.1.p	UP	Xiaohui	R. solanacearum		2022	10.1007/s00438-022-01903-4	Singleton
Eucgr.E02505	RLP	Unknown	RLP_LRR	TM	Chr05	gene	32506039	32507884	+	PF00560	GO:0005515	disease resistance family protein / LRR family protein	Eucgr.E02505.1.p							Cluster 38
Eucgr.E02515	RLP	Unknown	RLP_LRR	TM_LRR	Chr05	gene	32370072	32371835	+	PF00560	GO:0005515	disease resistance family protein / LRR family protein	Eucgr.E02515.1.p							Cluster 38
Eucgr.E02525	RLP	Unknown	RLP_LRR	TM_LRR	Chr05	gene	32199003	32200796	+	PF00560,PF13855	GO:0005515	disease resistance family protein / LRR family protein	Eucgr.E02525.1.p							Cluster 38
Eucgr.E02541	RLP	Unknown	RLP_LRR	TM_LRR	Chr05	gene	38857144	38859888	+	PF08263,PF00560,PF13855	GO:0005515	receptor like protein 6	Eucgr.E02541.1.p							Singleton
Eucgr.E02755	RLK	Unknown	RLK_LRR-VI	TM_K_LRR	Chr05	gene	48904575	48909476	-	PF13855,PF08263,PF07714	GO:0005515,GO:0006468,GO:0004672	Leucine-rich repeat protein kinase family protein	Eucgr.E02755.1.p	DOWN	Xiaohui	R. solanacearum		2022	10.1007/s00438-022-01903-4	Cluster 40
Eucgr.E02759	RLK	Unknown	RLK_LRR-VII	TM_K_LRR	Chr05	gene	48854193	48858354	-	PF00560,PF13855,PF07714	GO:0005515,GO:0006468,GO:0004672	Leucine-rich repeat protein kinase family protein	Eucgr.E02759.1.p							Cluster 40
Eucgr.E02765	RLP	Unknown	RLP_LRR	TM_LRR	Chr05	gene	48762724	48764423	+	PF00560,PF13855	GO:0005515	receptor like protein 51	Eucgr.E02765.1.p							Cluster 40
Eucgr.E02840	RLK	Unknown	RLK_LRR-VIII	TM_K_Malec	Chr05	gene	47108272	47116813	-	PF11721,PF07714	GO:0006468,GO:0004672	receptor-like kinase in flowers 1	Eucgr.E02840.1.p							Cluster 39
Eucgr.E02842	RLK	Unknown	RLK_LRR-VIII	TM_K_Malec	Chr05	gene	47093570	47102214	-	PF11721,PF07714	GO:0006468,GO:0004672	receptor-like kinase in flowers 1	Eucgr.E02842.1.p							Cluster 39
Eucgr.E02843	RLK	Unknown	RLK_LRR-VIII	TM_K_Malec	Chr05	gene	47075244	47082398	-	PF11721,PF07714	GO:0006468,GO:0004672	receptor-like kinase in flowers 1	Eucgr.E02843.1.p	DOWN	Xiaohui	R. solanacearum		2022	10.1007/s00438-022-01903-4	Cluster 39
Eucgr.E02843	RLK	Unknown	RLK_LRR-VIII	TM_K_Malec	Chr05	gene	47075244	47082398	-	PF11721,PF07714	GO:0006468,GO:0004672	receptor-like kinase in flowers 1	Eucgr.E02843.1.p	UP	Xiaohui	R. solanacearum		2022	10.1007/s00438-022-01903-4	Cluster 39
Eucgr.E02844	RLK	Unknown	RLK_LRR-VIII	TM_K_Malec	Chr05	gene	47052566	47060906	-	PF11721,PF07714	GO:0006468,GO:0004672	receptor-like kinase in flowers 1	Eucgr.E02844.1.p	UP	Mangwanda	C. austroafricana	Resistent	2015	10.1186/s12864-015-1529-x	Cluster 39
Eucgr.E03150	RLK	Unknown	RLK_LRR-XII	TM_K_LRR	Chr05	gene	55444400	55447434	+	PF08263,PF13855,PF00069	GO:0005515,GO:0006468,GO:0005524,GO:0004672	Leucine-rich repeat protein kinase family protein	Eucgr.E03150.1.p							Singleton
Eucgr.E03228	RLK	Unknown	RLK_LRR-XI	TM_K_LRR	Chr05	gene	53232352	53236715	-	PF08263,PF00560,PF07714,PF13855	GO:0005515,GO:0006468,GO:0004672	HAESA-like 1	Eucgr.E03228.1.p	UP	Xiaohui	R. solanacearum		2022	10.1007/s00438-022-01903-4	Singleton
Eucgr.E03228	RLK	Unknown	RLK_LRR-XI	TM_K_LRR	Chr05	gene	53232352	53236715	-	PF08263,PF00560,PF07714,PF13855	GO:0005515,GO:0006468,GO:0004672	HAESA-like 1	Eucgr.E03228.1.p	DOWN	Xiaohui	R. solanacearum		2022	10.1007/s00438-022-01903-4	Singleton
Eucgr.E03253	RLP	Unknown	RLP_LRR	TM_LRR_MalecLike	Chr05	gene	53659152	53669878	-	PF00560,PF11721	GO:0005515	receptor like protein 4	Eucgr.E03253.1.p	UP	Xiaohui	R. solanacearum		2022	10.1007/s00438-022-01903-4	Singleton
Eucgr.E03337	RLK	Unknown	RLK_LRR-XII	TM_K_LRR	Chr05	gene	59344329	59347364	-	PF08263,PF13855,PF07714	GO:0005515,GO:0006468,GO:0004672	Leucine-rich repeat protein kinase family protein	Eucgr.E03337.1.p							Cluster 41
Eucgr.E03344	RLK	Unknown	RLK_LRR-XII	TM_K_LRR	Chr05	gene	59437640	59440668	-	PF08263,PF13855,PF00069	GO:0005515,GO:0006468,GO:0005524,GO:0004672	Leucine-rich repeat protein kinase family protein	Eucgr.E03344.1.p							Cluster 41
Eucgr.E03366	RLK	Unknown	RLK_LRR-V	TM_K_LRR	Chr05	gene	59638779	59647179	+	PF13855,PF07714	GO:0005515,GO:0006468,GO:0004672	STRUBBELIG-receptor family 3	Eucgr.E03366.1.p							Cluster 41
Eucgr.E03940	RLK	Unknown	RLK_LRR-XII	TM_K_LRR	Chr05	gene	72067786	72070740	-	PF00560,PF13855,PF00069	GO:0005515,GO:0006468,GO:0005524,GO:0004672	Leucine-rich repeat receptor-like protein kinase family protein	Eucgr.E03940.1.p							Cluster 42
Eucgr.E03948	RLK	Unknown	RLK_LRR-XII	TM_K_LRR	Chr05	gene	72002808	72005780	-	PF00560,PF13855,PF00069	GO:0005515,GO:0006468,GO:0005524,GO:0004672	Leucine-rich repeat receptor-like protein kinase family protein	Eucgr.E03948.1.p							Cluster 42
Eucgr.E04263	RLP	Unknown	RLP_LRR	TM_LRR	Chr05	gene	75172906	75178176	+	PF00560,PF13855	GO:0005515	receptor like protein 9	Eucgr.E04263.1.p							Cluster 43
Eucgr.E04266	RLP	Unknown	RLP_LRR	TM_LRR	Chr05	gene	75186289	75191264	+	PF00560,PF13855	GO:0005515	receptor like protein 13	Eucgr.E04266.1.p							Cluster 43
Eucgr.E04272	RLP	Unknown	RLP_LRR	TM_LRR	Chr05	gene	75210927	75213262	+	PF13855	GO:0005515	receptor like protein 15	Eucgr.E04272.1.p							Cluster 43
Eucgr.E04274	RLP	Unknown	RLP_LRR	TM_LRR	Chr05	gene	75235788	75238212	+	PF13855	GO:0005515	receptor like protein 15	Eucgr.E04274.1.p							Cluster 43
Eucgr.E04279	RLP	Unknown	RLP_LRR	TM_LRR	Chr05	gene	75285019	75290594	+	PF13855	GO:0005515	RNI-like superfamily protein	Eucgr.E04279.1.p							Cluster 43
Eucgr.E04282	RLP	Unknown	RLP_LRR	TM_LRR	Chr05	gene	75322993	75325232	+	PF13855	GO:0005515	receptor like protein 9	Eucgr.E04282.1.p							Cluster 43
Eucgr.E04285	RLP	Unknown	RLP_LRR	TM_LRR	Chr05	gene	75335178	75339442	+	PF13855	GO:0005515	receptor like protein 9	Eucgr.E04285.1.p	DOWN	Xiaohui	R. solanacearum		2022	10.1007/s00438-022-01903-4	Cluster 43
Eucgr.E04289	CL	Unknown	RLP_LRR	TM_LRR	Chr05	gene	75362994	75368975	+	PF13855	GO:0005515	receptor like protein 9	Eucgr.E04289.1.p							Cluster 43
Eucgr.E04291	RLP	Unknown	RLP_LRR	TM_LRR	Chr05	gene	75392013	75394158	+	PF13855	GO:0005515	receptor like protein 15	Eucgr.E04291.1.p							Cluster 43
Eucgr.E04368	RLP	Unknown	RLP_LRR	TM_LRR	Chr05	gene	76170441	76171004	+	PF13855	GO:0005515	receptor like protein 25	Eucgr.E04368.1.p	DOWN	Xiaohui	R. solanacearum		2022	10.1007/s00438-022-01903-4	Cluster 44
Eucgr.E04372	RLK	Unknown	RLK_LRR-XII	TM_K_LRR	Chr05	gene	76213080	76215443	+	PF13855,PF00069	GO:0005515,GO:0006468,GO:0005524,GO:0004672	Leucine-rich repeat receptor-like protein kinase family protein	Eucgr.E04372.1.p							Cluster 44
Eucgr.F00047	RLP	Unknown	RLP_LRR	TM_LRR	Chr06	gene	942343	944370	-	PF00560,PF13855	GO:0005515	receptor like protein 13	Eucgr.F00047.1.p							Cluster 45
Eucgr.F00048	RLP	Unknown	RLP_LRR	TM_LRR	Chr06	gene	994074	996095	-	PF00560,PF13855	GO:0005515	receptor like protein 13	Eucgr.F00048.1.p	UP	Mangwanda	C. austroafricana	Resistent	2015	10.1186/s12864-015-1529-x	Cluster 45
Eucgr.F00060	RLP	Unknown	RLP_LRR	TM_LRR	Chr06	gene	1289871	1293160	-	PF00560	GO:0005515	receptor like protein 15	Eucgr.F00060.1.p							Cluster 46
Eucgr.F00066	RLP	Unknown	RLP_LRR	TM_LRR	Chr06	gene	1397313	1399433	-	PF00560,PF13855	GO:0005515	receptor like protein 13	Eucgr.F00066.1.p	DOWN	Mangwanda	C. austroafricana	Susceptible	2015	10.1186/s12864-015-1529-x	Cluster 46
Eucgr.F00068	RLP	Unknown	RLP_LRR	TM	Chr06	gene	1440991	1443120	-	PF00560	GO:0005515	receptor like protein 13	Eucgr.F00068.1.p							Cluster 46
Eucgr.F00189	RLK	Unknown	RLK_LRR-III	TM_K_LRR	Chr06	gene	2713765	2717326	-	PF13855,PF07714	GO:0005515,GO:0006468,GO:0004672	Leucine-rich repeat protein kinase family protein	Eucgr.F00189.1.p	DOWN	Xiaohui	R. solanacearum		2022	10.1007/s00438-022-01903-4	Singleton
Eucgr.F00189	RLK	Unknown	RLK_LRR-III	TM_K_LRR	Chr06	gene	2713765	2717326	-	PF13855,PF07714	GO:0005515,GO:0006468,GO:0004672	Leucine-rich repeat protein kinase family protein	Eucgr.F00189.1.p	UP	Xiaohui	R. solanacearum		2022	10.1007/s00438-022-01903-4	Singleton
Eucgr.F00281	RLP	Unknown	RLP_LRR	TM_LRR	Chr06	gene	5886926	5890214	-	PF08263,PF13855	GO:0005515	receptor like protein 6	Eucgr.F00281.1.p							Cluster 47
Eucgr.F00286	RLP	Unknown	RLP_LRR	TM_LRR	Chr06	gene	5808256	5811372	-	PF00560,PF13855	GO:0005515	receptor like protein 7	Eucgr.F00286.1.p							Cluster 47
Eucgr.F00289	RLP	Unknown	RLP_LRR	TM_LRR	Chr06	gene	5794033	5797626	-	PF08263,PF00560,PF13855	GO:0005515	receptor like protein 6	Eucgr.F00289.1.p	DOWN	Mangwanda	C. austroafricana	Susceptible	2015	10.1186/s12864-015-1529-x	Cluster 47
Eucgr.F00297	RLP	Unknown	RLP_LRR	TM_LRR	Chr06	gene	5746428	5749484	-	PF08263,PF00560,PF13855	GO:0005515	receptor like protein 33	Eucgr.F00297.1.p							Cluster 47
Eucgr.F00311	RLK	Unknown	RLK_LRR-XII	TM_K_LRR	Chr06	gene	5606415	5622298	+	PF08263,PF00560,PF07714,PF13855,PF00069	GO:0005515,GO:0006468,GO:0004672,GO:0005524	Leucine-rich repeat transmembrane protein kinase	Eucgr.F00311.1.p	DOWN	Oates	L. invasa	Resistent	2015	10.1093/pcp/pcv064	Cluster 47
Eucgr.F00311	RLK	Unknown	RLK_LRR-XII	TM_K_LRR	Chr06	gene	5606415	5622298	+	PF08263,PF00560,PF07714,PF13855,PF00069	GO:0005515,GO:0006468,GO:0004672,GO:0005524	Leucine-rich repeat transmembrane protein kinase	Eucgr.F00311.1.p	UP	Xiaohui	R. solanacearum		2022	10.1007/s00438-022-01903-4	Cluster 47
Eucgr.F00311	RLK	Unknown	RLK_LRR-XII	TM_K_LRR	Chr06	gene	5606415	5622298	+	PF08263,PF00560,PF07714,PF13855,PF00069	GO:0005515,GO:0006468,GO:0004672,GO:0005524	Leucine-rich repeat transmembrane protein kinase	Eucgr.F00311.1.p	DOWN	Xiaohui	R. solanacearum		2022	10.1007/s00438-022-01903-4	Cluster 47
Eucgr.F00314	RLK	Unknown	RLK_LRR-XII	TM_K_LRR	Chr06	gene	5586470	5590029	+	PF08263,PF13855,PF00069	GO:0005515,GO:0006468,GO:0005524,GO:0004672	Leucine-rich repeat receptor-like protein kinase family protein	Eucgr.F00314.1.p	UP	Santos	A. psidii	Susceptible	2020	10.1007/s11103-020-01030-x	Cluster 47
Eucgr.F00314	RLK	Unknown	RLK_LRR-XII	TM_K_LRR	Chr06	gene	5586470	5590029	+	PF08263,PF13855,PF00069	GO:0005515,GO:0006468,GO:0005524,GO:0004672	Leucine-rich repeat receptor-like protein kinase family protein	Eucgr.F00314.1.p	DOWN	Xiaohui	R. solanacearum		2022	10.1007/s00438-022-01903-4	Cluster 47
Eucgr.F00314	RLK	Unknown	RLK_LRR-XII	TM_K_LRR	Chr06	gene	5586470	5590029	+	PF08263,PF13855,PF00069	GO:0005515,GO:0006468,GO:0005524,GO:0004672	Leucine-rich repeat receptor-like protein kinase family protein	Eucgr.F00314.1.p	DOWN	Oates	L. invasa	Resistent	2015	10.1093/pcp/pcv064	Cluster 47
Eucgr.F00316	RLK	Unknown	RLK_LRR-XII	TM_K_LRR	Chr06	gene	5561785	5571145	+	PF08263,PF13855,PF00069	GO:0005515,GO:0006468,GO:0005524,GO:0004672	Leucine-rich repeat receptor-like protein kinase family protein	Eucgr.F00316.1.p	DOWN	Oates	L. invasa	Resistent	2015	10.1093/pcp/pcv064	Cluster 47
Eucgr.F00316	RLK	Unknown	RLK_LRR-XII	TM_K_LRR	Chr06	gene	5561785	5571145	+	PF08263,PF13855,PF00069	GO:0005515,GO:0006468,GO:0005524,GO:0004672	Leucine-rich repeat receptor-like protein kinase family protein	Eucgr.F00316.1.p	DOWN	Xiaohui	R. solanacearum		2022	10.1007/s00438-022-01903-4	Cluster 47
Eucgr.F00316	RLK	Unknown	RLK_LRR-XII	TM_K_LRR	Chr06	gene	5561785	5571145	+	PF08263,PF13855,PF00069	GO:0005515,GO:0006468,GO:0005524,GO:0004672	Leucine-rich repeat receptor-like protein kinase family protein	Eucgr.F00316.1.p	UP	Santos	A. psidii	Susceptible	2020	10.1007/s11103-020-01030-x	Cluster 47
Eucgr.F00467	RLK	Unknown	RLK_LRR-XI	TM_K_LRR	Chr06	gene	4087194	4090688	-	PF08263,PF00069	GO:0006468,GO:0005524,GO:0004672	Leucine-rich receptor-like protein kinase family protein	Eucgr.F00467.1.p							Singleton
Eucgr.F00512	RLP	Unknown	RLP_LRR	TM_LRR	Chr06	gene	6547721	6550716	-	PF00560,PF13855	GO:0005515	receptor like protein 7	Eucgr.F00512.1.p							Cluster 48
Eucgr.F00516	RLP	Unknown	RLP_LRR	TM_LRR	Chr06	gene	6524205	6527267	-	PF08263,PF00560,PF13855	GO:0005515	receptor like protein 43	Eucgr.F00516.1.p							Cluster 48
Eucgr.F00522	RLP	Unknown	RLP_LRR	TM_LRR	Chr06	gene	6433097	6436119	-	PF08263,PF13855	GO:0005515	receptor like protein 47	Eucgr.F00522.1.p							Cluster 48
Eucgr.F00536	RLP	Unknown	RLP_LRR	TM_LRR	Chr06	gene	6038731	6041356	+	PF08263,PF00560,PF13855	GO:0005515	receptor like protein 33	Eucgr.F00536.1.p							Cluster 47
Eucgr.F00560	RLP	Unknown	RLP_LRR	TM_LRR	Chr06	gene	8365828	8372345	-	PF08263,PF00560,PF13855	GO:0005515	receptor like protein 34	Eucgr.F00560.1.p							Cluster 49
Eucgr.F00566	RLP	Unknown	RLP_LRR	TM_LRR	Chr06	gene	8430260	8430937	-	PF00560	GO:0005515	receptor like protein 25	Eucgr.F00566.1.p							Cluster 49
Eucgr.F00569	RLP	Unknown	RLP_LRR	TM_LRR	Chr06	gene	8442756	8444999	-	PF08263,PF00560,PF13855	GO:0005515	receptor like protein 32	Eucgr.F00569.1.p	DOWN	Mangwanda	C. austroafricana	Susceptible	2015	10.1186/s12864-015-1529-x	Cluster 49
Eucgr.F00574	RLP	Unknown	RLP_LRR	TM_LRR	Chr06	gene	8502189	8504705	-	PF00560	GO:0005515	receptor like protein 33	Eucgr.F00574.1.p	DOWN	Mangwanda	C. austroafricana	Resistent	2015	10.1186/s12864-015-1529-x	Cluster 49
Eucgr.F00576	RLP	Unknown	RLP_LRR	TM_LRR	Chr06	gene	8513745	8516090	-	PF08263,PF00560,PF13855	GO:0005515	receptor like protein 47	Eucgr.F00576.1.p	DOWN	Mangwanda	C. austroafricana	Susceptible	2015	10.1186/s12864-015-1529-x	Cluster 49
Eucgr.F00576	RLP	Unknown	RLP_LRR	TM_LRR	Chr06	gene	8513745	8516090	-	PF08263,PF00560,PF13855	GO:0005515	receptor like protein 47	Eucgr.F00576.1.p	DOWN	Xiaohui	R. solanacearum		2022	10.1007/s00438-022-01903-4	Cluster 49
Eucgr.F00579	RLP	Unknown	RLP_LRR	TM_LRR	Chr06	gene	8536735	8538987	-	PF08263,PF00560,PF13855	GO:0005515	receptor like protein 27	Eucgr.F00579.1.p							Cluster 49
Eucgr.F00607	RLP	Unknown	RLP_LRR	TM_LRR	Chr06	gene	8862673	8865592	+	PF08263,PF00560,PF13855	GO:0005515	receptor like protein 52	Eucgr.F00607.1.p							Singleton
Eucgr.F00657	RLP	Unknown	RLP_LRR	TM_LRR	Chr06	gene	9572866	9575520	-	PF08263,PF00560,PF13855	GO:0005515	receptor like protein 33	Eucgr.F00657.1.p							Cluster 50
Eucgr.F00660	RLP	Unknown	RLP_LRR	TM_LRR	Chr06	gene	9617874	9620588	-	PF00560	GO:0005515	receptor like protein 33	Eucgr.F00660.1.p							Cluster 50
Eucgr.F00662	RLP	Unknown	RLP_LRR	TM_LRR	Chr06	gene	9641267	9644058	-	PF00560,PF13855	GO:0005515	receptor like protein 7	Eucgr.F00662.1.p							Cluster 50
Eucgr.F00665	RLP	Unknown	RLP_LRR	TM_LRR	Chr06	gene	9707988	9711138	-	PF00560,PF13855	GO:0005515	receptor like protein 33	Eucgr.F00665.1.p	DOWN	Xiaohui	R. solanacearum		2022	10.1007/s00438-022-01903-4	Cluster 50
Eucgr.F00675	RLP	Unknown	RLP_LRR	TM_LRR	Chr06	gene	9826931	9829848	-	PF08263,PF00560,PF13855	GO:0005515	receptor like protein 27	Eucgr.F00675.1.p	UP	Xiaohui	R. solanacearum		2022	10.1007/s00438-022-01903-4	Cluster 50
Eucgr.F00676	RLP	Unknown	RLP_LRR	TM_LRR	Chr06	gene	9841916	9844855	-	PF08263,PF00560,PF13855	GO:0005515	receptor like protein 27	Eucgr.F00676.1.p							Cluster 50
Eucgr.F00681	RLP	Unknown	RLP_LRR	TM_LRR	Chr06	gene	9912348	9915021	-	PF00560,PF13855	GO:0005515	receptor like protein 27	Eucgr.F00681.1.p							Cluster 50
Eucgr.F00688	RLP	Unknown	RLP_LRR	TM_LRR	Chr06	gene	9965950	9968992	-	PF00560,PF13855	GO:0005515	receptor like protein 6	Eucgr.F00688.1.p							Cluster 50
Eucgr.F00689	RLP	Unknown	RLP_LRR	TM_LRR	Chr06	gene	9979516	9982636	-	PF08263,PF00560,PF13855	GO:0005515	receptor like protein 6	Eucgr.F00689.1.p	DOWN	Mangwanda	C. austroafricana	Resistent	2015	10.1186/s12864-015-1529-x	Cluster 50
Eucgr.F00693	RLP	Unknown	RLP_LRR	TM_LRR	Chr06	gene	10032867	10035868	-	PF08263,PF00560,PF13855	GO:0005515	receptor like protein 6	Eucgr.F00693.1.p							Cluster 50
Eucgr.F00696	RLP	Unknown	RLP_LRR	TM_LRR	Chr06	gene	10066592	10069829	-	PF08263,PF00560,PF13855	GO:0005515	receptor like protein 32	Eucgr.F00696.1.p							Cluster 50
Eucgr.F00701	RLP	Unknown	RLP_LRR	TM_LRR	Chr06	gene	10135569	10138829	-	PF08263,PF00560,PF13855	GO:0005515	receptor like protein 6	Eucgr.F00701.1.p	UP	Xiaohui	R. solanacearum		2022	10.1007/s00438-022-01903-4	Cluster 50
Eucgr.F00706	RLP	Unknown	RLP_LRR	TM_LRR	Chr06	gene	10209292	10212585	-	PF08263,PF00560,PF13855	GO:0005515	receptor like protein 6	Eucgr.F00706.1.p	DOWN	Xiaohui	R. solanacearum		2022	10.1007/s00438-022-01903-4	Cluster 50
Eucgr.F00731	RLP	Unknown	RLP_LRR	TM_LRR	Chr06	gene	10523903	10526263	-	PF00560,PF13855	GO:0005515	receptor like protein 52	Eucgr.F00731.1.p							Singleton
Eucgr.F01155	RLK	Unknown	RLK_LRR-X	TM_K_LRR	Chr06	gene	15789567	15793920	+	PF08263,PF00560,PF00069,PF13855	GO:0005515,GO:0006468,GO:0005524,GO:0004672	phytosylfokine-alpha receptor 2	Eucgr.F01155.2.p	UP	Oates	L. invasa	Susceptible	2015	10.1093/pcp/pcv064	Cluster 51
Eucgr.F01162	RLK	Unknown	RLK_LRR-XII	TM_K_LRR	Chr06	gene	15836222	15839340	-	PF08263,PF00069	GO:0006468,GO:0005524,GO:0004672	Leucine-rich repeat protein kinase family protein	Eucgr.F01162.1.p							Cluster 51
Eucgr.F01305	RLK	Unknown	RLK_LRR-VIII	TM_K_Malec	Chr06	gene	17399380	17406121	-	PF07714,PF11721	GO:0006468,GO:0004672	Leucine-rich repeat transmembrane protein kinase		DOWN	Oates	L. invasa	Resistent	2015	10.1093/pcp/pcv064	Cluster 52
Eucgr.F01306	RLK	Unknown	RLK_LRR-VIII	TM_K_Malec	Chr06	gene	17431054	17437799	-	PF07714,PF11721	GO:0006468,GO:0004672	Leucine-rich repeat transmembrane protein kinase	Eucgr.F01306.1.p	UP	Mangwanda	C. austroafricana	Resistent	2015	10.1186/s12864-015-1529-x	Cluster 52
Eucgr.F01306	RLK	Unknown	RLK_LRR-VIII	TM_K_Malec	Chr06	gene	17431054	17437799	-	PF07714,PF11721	GO:0006468,GO:0004672	Leucine-rich repeat transmembrane protein kinase	Eucgr.F01306.1.p	UP	Xiaohui	R. solanacearum		2022	10.1007/s00438-022-01903-4	Cluster 52
Eucgr.F01307	RLK	Unknown	RLK_LRR-VIII	TM_K_LRR_Malec	Chr06	gene	17466429	17483294	+	PF13855,PF07714,PF11721	GO:0005515,GO:0006468,GO:0004672	Leucine-rich repeat transmembrane protein kinase	Eucgr.F01307.1.p	DOWN	Mangwanda	C. austroafricana	Resistent	2015	10.1186/s12864-015-1529-x	Cluster 52
Eucgr.F01307	RLK	Unknown	RLK_LRR-VIII	TM_K_LRR_Malec	Chr06	gene	17466429	17483294	+	PF13855,PF07714,PF11721	GO:0005515,GO:0006468,GO:0004672	Leucine-rich repeat transmembrane protein kinase	Eucgr.F01307.1.p	DOWN	Xiaohui	R. solanacearum		2022	10.1007/s00438-022-01903-4	Cluster 52
Eucgr.F01307	RLK	Unknown	RLK_LRR-VIII	TM_K_LRR_Malec	Chr06	gene	17466429	17483294	+	PF13855,PF07714,PF11721	GO:0005515,GO:0006468,GO:0004672	Leucine-rich repeat transmembrane protein kinase	Eucgr.F01307.1.p	DOWN	Oates	L. invasa	Susceptible	2015	10.1093/pcp/pcv064	Cluster 52
Eucgr.F01307	RLK	Unknown	RLK_LRR-VIII	TM_K_LRR_Malec	Chr06	gene	17466429	17483294	+	PF13855,PF07714,PF11721	GO:0005515,GO:0006468,GO:0004672	Leucine-rich repeat transmembrane protein kinase	Eucgr.F01307.1.p	UP	Xiaohui	R. solanacearum		2022	10.1007/s00438-022-01903-4	Cluster 52
Eucgr.F01310	RLK	Unknown	RLK_LRR-VIII	TM_K_LRR_Malec	Chr06	gene	17553065	17574907	+	PF13855,PF07714,PF11721	GO:0005515,GO:0006468,GO:0004672	Leucine-rich repeat transmembrane protein kinase	Eucgr.F01310.1.p	DOWN	Mangwanda	C. austroafricana	Susceptible	2015	10.1186/s12864-015-1529-x	Cluster 52
Eucgr.F01310	RLK	Unknown	RLK_LRR-VIII	TM_K_LRR_Malec	Chr06	gene	17553065	17574907	+	PF13855,PF07714,PF11721	GO:0005515,GO:0006468,GO:0004672	Leucine-rich repeat transmembrane protein kinase	Eucgr.F01310.1.p	UP	Santos	A. psidii	Susceptible	2020	10.1007/s11103-020-01030-x	Cluster 52
Eucgr.F01312	RLK	Unknown	RLK_LRR-VIII	TM_K_Malec	Chr06	gene	17639466	17652552	+	PF00560,PF00069,PF11721	GO:0005515,GO:0006468,GO:0005524,GO:0004672	Leucine-rich repeat transmembrane protein kinase	Eucgr.F01312.1.p	UP	Xiaohui	R. solanacearum		2022	10.1007/s00438-022-01903-4	Cluster 52
Eucgr.F01314	RLK	Unknown	RLK_LRR-VIII	TM_LRR_Malec	Chr06	gene	17729047	17741595	+	PF13855,PF07714,PF11721	GO:0005515,GO:0006468,GO:0004672	Leucine-rich repeat transmembrane protein kinase	Eucgr.F01314.1.p							Cluster 52
Eucgr.F01343	RLK	Unknown	RLK_LRR-VIII	TM_K_Malec	Chr06	gene	18251982	18265656	-	PF00560,PF11721,PF07714	GO:0005515,GO:0006468,GO:0004672	Leucine-rich repeat transmembrane protein kinase	Eucgr.F01343.1.p							Singleton
Eucgr.F01353	RLK	Unknown	RLK_LRR-VIII	TM_K_Malec	Chr06	gene	18476353	18494378	+	PF00560,PF07714,PF11721	GO:0005515,GO:0006468,GO:0004672	Leucine-rich repeat transmembrane protein kinase	Eucgr.F01353.1.p							Cluster 53
Eucgr.F01359	RLK	Unknown	RLK_LRR-VIII	TM_K_LRR_Malec	Chr06	gene	18669308	18681440	+	PF13855,PF11721,PF00069	GO:0005515,GO:0006468,GO:0005524,GO:0004672	Leucine-rich repeat transmembrane protein kinase	Eucgr.F01359.1.p							Cluster 53
Eucgr.F01361	RLK	Unknown	RLK_LRR-VIII	TM_K_LRR_Malec	Chr06	gene	18724740	18736606	+	PF13855,PF07714,PF11721	GO:0005515,GO:0006468,GO:0004672	Leucine-rich repeat transmembrane protein kinase	Eucgr.F01361.1.p							Cluster 53
Eucgr.F01362	RLK	Unknown	RLK_LRR-VIII	TM_K_LRR_Malec	Chr06	gene	18778425	18791937	+	PF13855,PF07714,PF11721	GO:0005515,GO:0006468,GO:0004672	Leucine-rich repeat transmembrane protein kinase	Eucgr.F01362.1.p	UP	Mangwanda	C. austroafricana	Resistent	2015	10.1186/s12864-015-1529-x	Cluster 53
Eucgr.F01362	RLK	Unknown	RLK_LRR-VIII	TM_K_LRR_Malec	Chr06	gene	18778425	18791937	+	PF13855,PF07714,PF11721	GO:0005515,GO:0006468,GO:0004672	Leucine-rich repeat transmembrane protein kinase	Eucgr.F01362.1.p	UP	Mangwanda	C. austroafricana	Susceptible	2015	10.1186/s12864-015-1529-x	Cluster 53
Eucgr.F01801	RLK	Unknown	RLK_LRR-XII	TM_K_LRR	Chr06	gene	24217533	24220452	+	PF13855,PF00069	GO:0005515,GO:0006468,GO:0005524,GO:0004672	Leucine-rich repeat protein kinase family protein	Eucgr.F01801.1.p	DOWN	Xiaohui	R. solanacearum		2022	10.1007/s00438-022-01903-4	Singleton
Eucgr.F01801	RLK	Unknown	RLK_LRR-XII	TM_K_LRR	Chr06	gene	24217533	24220452	+	PF13855,PF00069	GO:0005515,GO:0006468,GO:0005524,GO:0004672	Leucine-rich repeat protein kinase family protein	Eucgr.F01801.1.p	DOWN	Santos	A. psidii	Susceptible	2020	10.1007/s11103-020-01030-x	Singleton
Eucgr.F01891	RLK	Unknown	RLK_LRR-XIV	TM_K_LRR	Chr06	gene	28918394	28924246	+	PF07714,PF13855	GO:0006468,GO:0004672,GO:0005515	Leucine-rich repeat protein kinase family protein	Eucgr.F01891.1.p							Singleton
Eucgr.F01967	CLK	Unknown	RLK_LRR-XII	TM_K_LRR	Chr06	gene	25913328	25916514	+	PF13855,PF00069	GO:0005515,GO:0006468,GO:0005524,GO:0004672	Leucine-rich repeat receptor-like protein kinase family protein	Eucgr.F01967.1.p							Singleton
Eucgr.F01980	RLK	Unknown	RLK_LRR-X	TM_K_LRR	Chr06	gene	26153316	26157150	+	PF08263,PF00069,PF13855	GO:0006468,GO:0005524,GO:0004672,GO:0005515	BRI1 like	Eucgr.F01980.1.p	UP	Xiaohui	R. solanacearum		2022	10.1007/s00438-022-01903-4	Singleton
Eucgr.F01980	RLK	Unknown	RLK_LRR-X	TM_K_LRR	Chr06	gene	26153316	26157150	+	PF08263,PF00069,PF13855	GO:0006468,GO:0005524,GO:0004672,GO:0005515	BRI1 like	Eucgr.F01980.1.p	UP	Mangwanda	C. austroafricana	Susceptible	2015	10.1186/s12864-015-1529-x	Singleton
Eucgr.F02022	RLK	Unknown	RLK_LRR-XI	TM_K_LRR	Chr06	gene	26739238	26744115	-	PF08263,PF07714,PF13855	GO:0006468,GO:0004672,GO:0005515	Leucine-rich receptor-like protein kinase family protein	Eucgr.F02022.1.p							Cluster 54
Eucgr.F02025	RLK	Unknown	RLK_LRR-XI	TM_K_LRR	Chr06	gene	26786546	26789916	-	PF00560,PF08263,PF00069,PF13855	GO:0005515,GO:0006468,GO:0005524,GO:0004672	Leucine-rich receptor-like protein kinase family protein	Eucgr.F02025.1.p							Cluster 54
Eucgr.F02113	RLK	Unknown	RLK_LRR-XII	TM_K_LRR	Chr06	gene	34819354	34822085	-	PF08263,PF13855,PF00069	GO:0005515,GO:0006468,GO:0005524,GO:0004672	Leucine-rich repeat receptor-like protein kinase family protein	Eucgr.F02113.1.p							Cluster 57
Eucgr.F02114	RLK	Unknown	RLK_LRR-XII	TM_K_LRR	Chr06	gene	34782436	34786186	-	PF08263,PF13855,PF00069	GO:0005515,GO:0006468,GO:0005524,GO:0004672	Protein kinase family protein with leucine-rich repeat domain	Eucgr.F02114.1.p							Cluster 57
Eucgr.F02115	RLK	Unknown	RLK_LRR-XII	TM_K_LRR	Chr06	gene	34765252	34767970	-	PF13855,PF00069	GO:0005515,GO:0006468,GO:0005524,GO:0004672	Leucine-rich repeat receptor-like protein kinase family protein	Eucgr.F02115.1.p							Cluster 57
Eucgr.F02116	RLK	Unknown	RLK_LRR-XII	TM_K_LRR	Chr06	gene	34700496	34703970	-	PF08263,PF00069,PF13855	GO:0006468,GO:0005524,GO:0004672,GO:0005515	Protein kinase family protein with leucine-rich repeat domain	Eucgr.F02116.1.p							Cluster 57
Eucgr.F02118	RLK	Unknown	RLK_LRR-XII	TM_LRR	Chr06	gene	34648177	34650589	-	PF08263,PF00069,PF13855	GO:0006468,GO:0005524,GO:0004672,GO:0005515	Leucine-rich repeat receptor-like protein kinase family protein	Eucgr.F02118.1.p							Cluster 57
Eucgr.F02120	RLK	Unknown	RLK_LRR-XII	TM_K_LRR	Chr06	gene	34605464	34608984	-	PF00560,PF08263,PF00069,PF13855	GO:0005515,GO:0006468,GO:0005524,GO:0004672	Protein kinase family protein with leucine-rich repeat domain	Eucgr.F02120.1.p							Cluster 57
Eucgr.F02121	RLK	Unknown	RLK_LRR-XII	TM_K_LRR	Chr06	gene	34584525	34587222	-	PF08263,PF13855,PF00069	GO:0005515,GO:0006468,GO:0005524,GO:0004672	Leucine-rich repeat receptor-like protein kinase family protein	Eucgr.F02121.1.p							Cluster 57
Eucgr.F02122	RLK	Unknown	RLK_LRR-XII	TM_K_LRR	Chr06	gene	34557642	34561000	-	PF08263,PF00560,PF00069,PF13855	GO:0005515,GO:0006468,GO:0005524,GO:0004672	Protein kinase family protein with leucine-rich repeat domain	Eucgr.F02122.1.p	UP	Santos	A. psidii	Susceptible	2020	10.1007/s11103-020-01030-x	Cluster 57
Eucgr.F02122	RLK	Unknown	RLK_LRR-XII	TM_K_LRR	Chr06	gene	34557642	34561000	-	PF08263,PF00560,PF00069,PF13855	GO:0005515,GO:0006468,GO:0005524,GO:0004672	Protein kinase family protein with leucine-rich repeat domain	Eucgr.F02122.1.p	UP	Mangwanda	C. austroafricana	Susceptible	2015	10.1186/s12864-015-1529-x	Cluster 57
Eucgr.F02122	RLK	Unknown	RLK_LRR-XII	TM_K_LRR	Chr06	gene	34557642	34561000	-	PF08263,PF00560,PF00069,PF13855	GO:0005515,GO:0006468,GO:0005524,GO:0004672	Protein kinase family protein with leucine-rich repeat domain	Eucgr.F02122.1.p	UP	Mangwanda	C. austroafricana	Resistent	2015	10.1186/s12864-015-1529-x	Cluster 57
Eucgr.F02181	RLK	Unknown	RLK_LRR-XI	TM_K_LRR	Chr06	gene	33704876	33708392	-	PF08263,PF00560,PF13855,PF00069	GO:0005515,GO:0006468,GO:0005524,GO:0004672	Leucine-rich receptor-like protein kinase family protein	Eucgr.F02181.1.p	UP	Mangwanda	C. austroafricana	Resistent	2015	10.1186/s12864-015-1529-x	Singleton
Eucgr.F02181	RLK	Unknown	RLK_LRR-XI	TM_K_LRR	Chr06	gene	33704876	33708392	-	PF08263,PF00560,PF13855,PF00069	GO:0005515,GO:0006468,GO:0005524,GO:0004672	Leucine-rich receptor-like protein kinase family protein	Eucgr.F02181.1.p	UP	Mangwanda	C. austroafricana	Susceptible	2015	10.1186/s12864-015-1529-x	Singleton
Eucgr.F02181	RLK	Unknown	RLK_LRR-XI	TM_K_LRR	Chr06	gene	33704876	33708392	-	PF08263,PF00560,PF13855,PF00069	GO:0005515,GO:0006468,GO:0005524,GO:0004672	Leucine-rich receptor-like protein kinase family protein	Eucgr.F02181.1.p	UP	Santos	A. psidii	Susceptible	2020	10.1007/s11103-020-01030-x	Singleton
Eucgr.F02244	RLK	Unknown	RLK_LRR-XII	TM_K_LRR	Chr06	gene	32879116	32884013	-	PF08263,PF00069	GO:0006468,GO:0005524,GO:0004672	Leucine-rich repeat protein kinase family protein	Eucgr.F02244.2.p	DOWN	Xiaohui	R. solanacearum		2022	10.1007/s00438-022-01903-4	Cluster 56
Eucgr.F02244	RLK	Unknown	RLK_LRR-XII	TM_K_LRR	Chr06	gene	32879116	32884013	-	PF08263,PF00069	GO:0006468,GO:0005524,GO:0004672	Leucine-rich repeat protein kinase family protein	Eucgr.F02244.2.p	UP	Santos	A. psidii	Susceptible	2020	10.1007/s11103-020-01030-x	Cluster 56
Eucgr.F02245	RLK	Unknown	RLK_LRR-XII	TM_K_LRR	Chr06	gene	32862509	32867061	-	PF08263,PF13855,PF07714	GO:0005515,GO:0006468,GO:0004672	Leucine-rich repeat protein kinase family protein	Eucgr.F02245.1.p	DOWN	Oates	L. invasa	Resistent	2015	10.1093/pcp/pcv064	Cluster 56
Eucgr.F02272	RLK	Unknown	RLK_LRR-XII	TM_K_LRR	Chr06	gene	32502124	32505259	-	PF00560,PF08263,PF00069	GO:0005515,GO:0006468,GO:0005524,GO:0004672	Leucine-rich repeat protein kinase family protein	Eucgr.F02272.1.p							Singleton
Eucgr.F02341	RLK	Unknown	RLP_LRR	TM_LRR	Chr06	gene	31347876	31350264	+	PF08263,PF07714	GO:0006468,GO:0004672	Leucine-rich repeat protein kinase family protein	Eucgr.F02341.1.p							Cluster 55
Eucgr.F02342	RLK	Unknown	RLK_LRR-XII	TM_K_LRR	Chr06	gene	31339020	31342242	+	PF00560,PF08263,PF13855,PF00069	GO:0005515,GO:0006468,GO:0005524,GO:0004672	Leucine-rich repeat protein kinase family protein	Eucgr.F02342.1.p	DOWN	Oates	L. invasa	Resistent	2015	10.1093/pcp/pcv064	Cluster 55
Eucgr.F02342	RLK	Unknown	RLK_LRR-XII	TM_K_LRR	Chr06	gene	31339020	31342242	+	PF00560,PF08263,PF13855,PF00069	GO:0005515,GO:0006468,GO:0005524,GO:0004672	Leucine-rich repeat protein kinase family protein	Eucgr.F02342.1.p	DOWN	Xiaohui	R. solanacearum		2022	10.1007/s00438-022-01903-4	Cluster 55
Eucgr.F02344	RLK	Unknown	RLK_LRR-XII	TM_K_LRR	Chr06	gene	31319597	31322592	+	PF08263,PF00069	GO:0006468,GO:0005524,GO:0004672	Leucine-rich repeat protein kinase family protein	Eucgr.F02344.1.p							Cluster 55
Eucgr.F02391	RLK	Unknown	RLK_LRR-VIII	TM_K_Malec	Chr06	gene	30502659	30514001	+	PF07714,PF11721	GO:0006468,GO:0004672	Leucine-rich repeat transmembrane protein kinase	Eucgr.F02391.1.p							Singleton
Eucgr.F02410	RLK	Unknown	RLK_LRR-XIII	TM_K_LRR	Chr06	gene	35977404	35981749	+	PF00560,PF08263,PF00069,PF13855	GO:0005515,GO:0006468,GO:0005524,GO:0004672	Leucine-rich repeat receptor-like protein kinase family protein	Eucgr.F02410.1.p							Cluster 58
Eucgr.F02419	RLK	Unknown	RLK_LRR-XII	TM_K_LRR	Chr06	gene	36236078	36239992	+	PF08263,PF13855,PF00069	GO:0005515,GO:0006468,GO:0005524,GO:0004672	Protein kinase family protein with leucine-rich repeat domain	Eucgr.F02419.1.p							Cluster 59
Eucgr.F02421	RLK	Unknown	RLK_LRR-XII	TM_K_LRR	Chr06	gene	36293976	36300204	+	PF00560,PF08263,PF00069,PF13855	GO:0005515,GO:0006468,GO:0005524,GO:0004672	Leucine-rich repeat receptor-like protein kinase family protein	Eucgr.F02421.1.p							Cluster 59
Eucgr.F02426	RLK	Unknown	RLK_LRR-XII	TM_K_LRR	Chr06	gene	36362353	36367316	+	PF00560,PF08263,PF00069,PF13855	GO:0005515,GO:0006468,GO:0005524,GO:0004672	Protein kinase family protein with leucine-rich repeat domain	Eucgr.F02426.1.p							Cluster 59
Eucgr.F02430	RLK	Unknown	RLK_LRR-XII	TM_K_LRR	Chr06	gene	36420745	36424315	+	PF08263,PF13855,PF00069	GO:0005515,GO:0006468,GO:0005524,GO:0004672	Leucine-rich repeat receptor-like protein kinase family protein	Eucgr.F02430.1.p	DOWN	Xiaohui	R. solanacearum		2022	10.1007/s00438-022-01903-4	Cluster 59
Eucgr.F02430	RLK	Unknown	RLK_LRR-XII	TM_K_LRR	Chr06	gene	36420745	36424315	+	PF08263,PF13855,PF00069	GO:0005515,GO:0006468,GO:0005524,GO:0004672	Leucine-rich repeat receptor-like protein kinase family protein	Eucgr.F02430.1.p	UP	Mangwanda	C. austroafricana	Resistent	2015	10.1186/s12864-015-1529-x	Cluster 59
Eucgr.F02590	RLK	Unknown	RLK_LRR-XII	TM_K_LRR	Chr06	gene	38000154	38003161	+	PF00560,PF08263,PF13855,PF00069	GO:0005515,GO:0006468,GO:0005524,GO:0004672	EF-TU receptor	Eucgr.F02590.1.p							Cluster 60
Eucgr.F02592	RLK	Unknown	RLK_LRR-XII	TM_K_LRR	Chr06	gene	38016525	38019555	+	PF08263,PF00560,PF13855,PF00069	GO:0005515,GO:0006468,GO:0005524,GO:0004672	Leucine-rich repeat protein kinase family protein	Eucgr.F02592.1.p							Cluster 60
Eucgr.F02599	RLK	Unknown	RLK_LRR-XII	TM_K_LRR	Chr06	gene	38127432	38130475	+	PF08263,PF00560,PF00069,PF13855	GO:0005515,GO:0006468,GO:0005524,GO:0004672	EF-TU receptor	Eucgr.F02599.1.p							Cluster 60
Eucgr.F02600	RLK	Unknown	RLK_LRR-XII	TM_K_LRR	Chr06	gene	38143480	38146528	+	PF08263,PF00560,PF00069	GO:0005515,GO:0006468,GO:0005524,GO:0004672	Leucine-rich repeat protein kinase family protein	Eucgr.F02600.1.p							Cluster 60
Eucgr.F02602	RLP	Unknown	RLP_LRR	TM_LRR	Chr06	gene	38176695	38178620	+	PF08263,PF00560,PF13855	GO:0005515	EF-TU receptor	Eucgr.F02602.1.p							Cluster 60
Eucgr.F02681	RLK	Unknown	RLK_LRR-XI	TM_K_LRR	Chr06	gene	38925132	38928587	-	PF13855,PF00069	GO:0005515,GO:0006468,GO:0005524,GO:0004672	Leucine-rich receptor-like protein kinase family protein	Eucgr.F02681.1.p							Singleton
Eucgr.F02724	RLK	Unknown	RLK_LRR-XII	TM_K	Chr06	gene	39369611	39372855	+	PF13855,PF07714	GO:0005515,GO:0006468,GO:0004672	Leucine-rich repeat protein kinase family protein	Eucgr.F02724.1.p							Cluster 61
Eucgr.F02727	RLK	Unknown	RLK_LRR-XI	TM_K_LRR	Chr06	gene	39395171	39398968	+	PF08263,PF00560,PF13855,PF00069	GO:0005515,GO:0006468,GO:0005524,GO:0004672	Leucine-rich repeat transmembrane protein kinase family protein	Eucgr.F02727.1.p	DOWN	Xiaohui	R. solanacearum		2022	10.1007/s00438-022-01903-4	Cluster 61
Eucgr.F02727	RLK	Unknown	RLK_LRR-XI	TM_K_LRR	Chr06	gene	39395171	39398968	+	PF08263,PF00560,PF13855,PF00069	GO:0005515,GO:0006468,GO:0005524,GO:0004672	Leucine-rich repeat transmembrane protein kinase family protein	Eucgr.F02727.1.p	UP	Xiaohui	R. solanacearum		2022	10.1007/s00438-022-01903-4	Cluster 61
Eucgr.F02779	RLP	Unknown	RLP_LRR	TM_LRR	Chr06	gene	39839032	39841959	+	PF08263,PF00560,PF13855	GO:0005515	receptor like protein 35	Eucgr.F02779.1.p	UP	Xiaohui	R. solanacearum		2022	10.1007/s00438-022-01903-4	Singleton
Eucgr.F02779	RLP	Unknown	RLP_LRR	TM_LRR	Chr06	gene	39839032	39841959	+	PF08263,PF00560,PF13855	GO:0005515	receptor like protein 35	Eucgr.F02779.1.p	DOWN	Santos	A. psidii	Susceptible	2020	10.1007/s11103-020-01030-x	Singleton
Eucgr.F02867	RLK	Unknown	RLK_LRR-III	TM_K_LRR	Chr06	gene	40886793	40888690	-	PF08263,PF00069	GO:0006468,GO:0005524,GO:0004672	Leucine-rich repeat protein kinase family protein	Eucgr.F02867.1.p	DOWN	Xiaohui	R. solanacearum		2022	10.1007/s00438-022-01903-4	Singleton
Eucgr.F02867	RLK	Unknown	RLK_LRR-III	TM_K_LRR	Chr06	gene	40886793	40888690	-	PF08263,PF00069	GO:0006468,GO:0005524,GO:0004672	Leucine-rich repeat protein kinase family protein	Eucgr.F02867.1.p	UP	Oates	L. invasa	Resistent	2015	10.1093/pcp/pcv064	Singleton
Eucgr.F02867	RLK	Unknown	RLK_LRR-III	TM_K_LRR	Chr06	gene	40886793	40888690	-	PF08263,PF00069	GO:0006468,GO:0005524,GO:0004672	Leucine-rich repeat protein kinase family protein	Eucgr.F02867.1.p	UP	Xiaohui	R. solanacearum		2022	10.1007/s00438-022-01903-4	Singleton
Eucgr.F02986	RLK	Unknown	RLK_LRR-XI	TM_K_LRR	Chr06	gene	41994097	41998909	-	PF08263,PF00069	GO:0006468,GO:0005524,GO:0004672	Leucine-rich receptor-like protein kinase family protein	Eucgr.F02986.1.p	UP	Xiaohui	R. solanacearum		2022	10.1007/s00438-022-01903-4	Singleton
Eucgr.F02986	RLK	Unknown	RLK_LRR-XI	TM_K_LRR	Chr06	gene	41994097	41998909	-	PF08263,PF00069	GO:0006468,GO:0005524,GO:0004672	Leucine-rich receptor-like protein kinase family protein	Eucgr.F02986.1.p	UP	Oates	L. invasa	Resistent	2015	10.1093/pcp/pcv064	Singleton
Eucgr.F03146	RLK	Unknown	RLK_LRR-XII	TM_K_LRR	Chr06	gene	43322612	43325788	-	PF08263,PF00069	GO:0006468,GO:0005524,GO:0004672	Leucine-rich repeat protein kinase family protein	Eucgr.F03146.1.p							Singleton
Eucgr.F03308	RLK	Unknown	RLK_LRR-III	TM_K_LRR	Chr06	gene	44624564	44627869	+	PF14531,PF08263,PF13855	GO:0005515	Leucine-rich receptor-like protein kinase family protein	Eucgr.F03308.1.p							Singleton
Eucgr.F03642	RLK	Unknown	RLK_LRR-X	TM_K_LRR	Chr06	gene	47296431	47301308	+	PF08263,PF00560,PF00069,PF13855	GO:0005515,GO:0006468,GO:0005524,GO:0004672	BRI1 like	Eucgr.F03642.1.p	UP	Xiaohui	R. solanacearum		2022	10.1007/s00438-022-01903-4	Singleton
Eucgr.F03669	RLK	Unknown	RLK_LRR-XI	TM_K_LRR	Chr06	gene	47528780	47532479	-	PF00560,PF08263,PF00069,PF13855	GO:0005515,GO:0006468,GO:0005524,GO:0004672	Leucine-rich receptor-like protein kinase family protein	Eucgr.F03669.1.p							Singleton
Eucgr.F03981	RLK	Unknown	RLK_LRR-XII	TM_K_LRR	Chr06	gene	50582540	50585653	-	PF03109,PF08263,PF13855	GO:0005515	Leucine-rich receptor-like protein kinase family protein	Eucgr.F03981.1.p							Cluster 62
Eucgr.F04005	RLK	Unknown	RLK_LRR-XI	TM_K_LRR	Chr06	gene	50728182	50731717	+	PF08263,PF13855,PF00069	GO:0005515,GO:0006468,GO:0005524,GO:0004672	PEP1 receptor 1	Eucgr.F04005.1.p							Cluster 62
Eucgr.F04007	RLK	Unknown	RLK_LRR-XI	TM_K_LRR	Chr06	gene	50750750	50754150	+	PF08263,PF13855,PF00069	GO:0005515,GO:0006468,GO:0005524,GO:0004672	PEP1 receptor 1	Eucgr.F04007.1.p							Cluster 62
Eucgr.F04077	RLK	Unknown	RLK_LRR-XII	TM_K_LRR	Chr06	gene	51504956	51508238	+	PF00560,PF08263,PF13855,PF00069	GO:0005515,GO:0006468,GO:0005524,GO:0004672	Leucine-rich repeat protein kinase family protein	Eucgr.F04077.1.p							Cluster 63
Eucgr.F04081	RLK	Unknown	RLK_LRR-XII	TM_K	Chr06	gene	51570357	51573499	+	PF00560,PF00069	GO:0005515,GO:0006468,GO:0005524,GO:0004672	Leucine-rich repeat protein kinase family protein	Eucgr.F04081.1.p	UP	Santos	A. psidii	Susceptible	2020	10.1007/s11103-020-01030-x	Cluster 63
Eucgr.F04081	RLK	Unknown	RLK_LRR-XII	TM_K	Chr06	gene	51570357	51573499	+	PF00560,PF00069	GO:0005515,GO:0006468,GO:0005524,GO:0004672	Leucine-rich repeat protein kinase family protein	Eucgr.F04081.1.p	DOWN	Oates	L. invasa	Resistent	2015	10.1093/pcp/pcv064	Cluster 63
Eucgr.F04082	RLK	Unknown	RLK_LRR-XII	TM_LRR	Chr06	gene	51609975	51613212	+	PF00560,PF08263,PF00069	GO:0005515,GO:0006468,GO:0005524,GO:0004672	Leucine-rich repeat protein kinase family protein	Eucgr.F04082.1.p							Cluster 63
Eucgr.F04084	RLK	Unknown	RLK_LRR-XII	TM_K_LRR	Chr06	gene	51643433	51646659	+	PF08263,PF07714	GO:0006468,GO:0004672	Leucine-rich repeat protein kinase family protein	Eucgr.F04084.1.p							Cluster 63
Eucgr.F04101	RLK	Unknown	RLK_LRR-XII	TM_K_LRR	Chr06	gene	51779868	51784571	-	PF08263,PF00069,PF13855	GO:0006468,GO:0005524,GO:0004672,GO:0005515	Protein kinase family protein with leucine-rich repeat domain	Eucgr.F04101.1.p	UP	Mangwanda	C. austroafricana	Resistent	2015	10.1186/s12864-015-1529-x	Cluster 63
Eucgr.F04133	RLK	Unknown	RLK_LRR-XI	TM_K_LRR	Chr06	gene	52007973	52011250	+	PF08263,PF00560,PF00069,PF13855	GO:0005515,GO:0006468,GO:0005524,GO:0004672	leucine-rich repeat transmembrane protein kinase family protein	Eucgr.F04133.1.p							Cluster 64
Eucgr.F04151	RLK	Unknown	RLK_LRR-II	TM_K_LRR	Chr06	gene	52178219	52184473	-	PF00560,PF08263,PF00069	GO:0005515,GO:0006468,GO:0005524,GO:0004672	somatic embryogenesis receptor-like kinase 1	Eucgr.F04151.1.p							Cluster 64
Eucgr.F04177	RLK	Unknown	RLK_LRR-VIII	TM_K_Malec	Chr06	gene	52528880	52533860	-	PF11721,PF07714	GO:0006468,GO:0004672	Leucine-rich repeat transmembrane protein kinase	Eucgr.F04177.1.p	DOWN	Xiaohui	R. solanacearum		2022	10.1007/s00438-022-01903-4	Cluster 65
Eucgr.F04178	RLP	Unknown	RLP_LRR	TM_Malec	Chr06	gene	52563705	52567829	-	PF11721		Leucine-rich repeat transmembrane protein kinase	Eucgr.F04178.1.p	DOWN	Xiaohui	R. solanacearum		2022	10.1007/s00438-022-01903-4	Cluster 65
Eucgr.F04179	RLK	Unknown	RLK_LRR-VIII	TM_K_Malec	Chr06	gene	52574971	52581905	-	PF07714,PF11721	GO:0006468,GO:0004672	Leucine-rich repeat transmembrane protein kinase	Eucgr.F04179.1.p							Cluster 65
Eucgr.F04180	RLK	Unknown	RLK_LRR-VIII	TM_K_Malec	Chr06	gene	52591100	52596782	-	PF11721,PF00069	GO:0006468,GO:0005524,GO:0004672	Leucine-rich repeat transmembrane protein kinase	Eucgr.F04180.1.p	UP	Xiaohui	R. solanacearum		2022	10.1007/s00438-022-01903-4	Cluster 65
Eucgr.F04321	RLK	Unknown	RLK_LRR-XII	TM_K_LRR	Chr06	gene	55621420	55624918	-	PF08263,PF00560,PF13855,PF00069	GO:0005515,GO:0006468,GO:0005524,GO:0004672	Leucine-rich repeat receptor-like protein kinase family protein	Eucgr.F04321.1.p							Singleton
Eucgr.F04390	RLK	Unknown	RLK_LRR-XII	TM_K_LRR	Chr06	gene	56418673	56421694	-	PF08263,PF00069	GO:0006468,GO:0005524,GO:0004672	Leucine-rich repeat protein kinase family protein	Eucgr.F04390.1.p							Cluster 66
Eucgr.F04391	RLK	Unknown	RLK_LRR-XII	TM_K_LRR	Chr06	gene	56458816	56461747	-	PF08263,PF13855,PF00069	GO:0005515,GO:0006468,GO:0005524,GO:0004672	Leucine-rich repeat protein kinase family protein	Eucgr.F04391.1.p							Cluster 66
Eucgr.F04393	RLK	Unknown	RLK_LRR-XII	TM_K_LRR	Chr06	gene	56476418	56479523	-	PF08263,PF13855,PF00069	GO:0005515,GO:0006468,GO:0005524,GO:0004672	Leucine-rich repeat protein kinase family protein	Eucgr.F04393.1.p							Cluster 66
Eucgr.F04434	RLK	Unknown	RLK_LRR-VIII	TM_K_Malec	Chr06	gene	56878674	56890048	-	PF07714,PF11721	GO:0006468,GO:0004672	Leucine-rich repeat transmembrane protein kinase	Eucgr.F04434.1.p	UP	Mangwanda	C. austroafricana	Resistent	2015	10.1186/s12864-015-1529-x	Cluster 67
Eucgr.F04434	RLK	Unknown	RLK_LRR-VIII	TM_K_Malec	Chr06	gene	56878674	56890048	-	PF07714,PF11721	GO:0006468,GO:0004672	Leucine-rich repeat transmembrane protein kinase	Eucgr.F04434.1.p	DOWN	Oates	L. invasa	Resistent	2015	10.1093/pcp/pcv064	Cluster 67
Eucgr.F04434	RLK	Unknown	RLK_LRR-VIII	TM_K_Malec	Chr06	gene	56878674	56890048	-	PF07714,PF11721	GO:0006468,GO:0004672	Leucine-rich repeat transmembrane protein kinase	Eucgr.F04434.1.p	UP	Santos	A. psidii	Susceptible	2020	10.1007/s11103-020-01030-x	Cluster 67
Eucgr.F04434	RLK	Unknown	RLK_LRR-VIII	TM_K_Malec	Chr06	gene	56878674	56890048	-	PF07714,PF11721	GO:0006468,GO:0004672	Leucine-rich repeat transmembrane protein kinase	Eucgr.F04434.1.p	UP	Xiaohui	R. solanacearum		2022	10.1007/s00438-022-01903-4	Cluster 67
Eucgr.F04434	RLK	Unknown	RLK_LRR-VIII	TM_K_Malec	Chr06	gene	56878674	56890048	-	PF07714,PF11721	GO:0006468,GO:0004672	Leucine-rich repeat transmembrane protein kinase	Eucgr.F04434.1.p	DOWN	Oates	L. invasa	Susceptible	2015	10.1093/pcp/pcv064	Cluster 67
Eucgr.F04434	RLK	Unknown	RLK_LRR-VIII	TM_K_Malec	Chr06	gene	56878674	56890048	-	PF00069,PF11721	GO:0006468,GO:0005524,GO:0004672	Leucine-rich repeat transmembrane protein kinase	Eucgr.F04434.1.p	UP	Xiaohui	R. solanacearum		2022	10.1007/s00438-022-01903-4	Cluster 67
Eucgr.F04434	RLK	Unknown	RLK_LRR-VIII	TM_K_Malec	Chr06	gene	56878674	56890048	-	PF00069,PF11721	GO:0006468,GO:0005524,GO:0004672	Leucine-rich repeat transmembrane protein kinase	Eucgr.F04434.1.p	DOWN	Oates	L. invasa	Resistent	2015	10.1093/pcp/pcv064	Cluster 67
Eucgr.F04434	RLK	Unknown	RLK_LRR-VIII	TM_K_Malec	Chr06	gene	56878674	56890048	-	PF00069,PF11721	GO:0006468,GO:0005524,GO:0004672	Leucine-rich repeat transmembrane protein kinase	Eucgr.F04434.1.p	DOWN	Oates	L. invasa	Susceptible	2015	10.1093/pcp/pcv064	Cluster 67
Eucgr.F04434	RLK	Unknown	RLK_LRR-VIII	TM_K_Malec	Chr06	gene	56878674	56890048	-	PF00069,PF11721	GO:0006468,GO:0005524,GO:0004672	Leucine-rich repeat transmembrane protein kinase	Eucgr.F04434.1.p	UP	Santos	A. psidii	Susceptible	2020	10.1007/s11103-020-01030-x	Cluster 67
Eucgr.F04434	RLK	Unknown	RLK_LRR-VIII	TM_K_Malec	Chr06	gene	56878674	56890048	-	PF00069,PF11721	GO:0006468,GO:0005524,GO:0004672	Leucine-rich repeat transmembrane protein kinase	Eucgr.F04434.1.p	UP	Mangwanda	C. austroafricana	Resistent	2015	10.1186/s12864-015-1529-x	Cluster 67
Eucgr.F04436	RLK	Unknown	RLK_LRR-VIII	TM_K_LRR_Malec	Chr06	gene	56924026	56932795	-	PF13855,PF07714,PF11721	GO:0005515,GO:0006468,GO:0004672	Leucine-rich repeat transmembrane protein kinase	Eucgr.F04436.1.p	DOWN	Xiaohui	R. solanacearum		2022	10.1007/s00438-022-01903-4	Cluster 67
Eucgr.G00037	RLK	Unknown	RLK_LRR-VIII	TM_K	Chr07	gene	374721	381560	+	PF07714	GO:0006468,GO:0004672	Leucine-rich repeat protein kinase family protein	Eucgr.G00037.1.p	DOWN	Xiaohui	R. solanacearum		2022	10.1007/s00438-022-01903-4	Cluster 68
Eucgr.G00038	RLK	Unknown	RLK_LRR-VIII	TM_K	Chr07	gene	401738	407896	+	PF07714	GO:0006468,GO:0004672	Leucine-rich repeat protein kinase family protein	Eucgr.G00038.1.p							Cluster 68
Eucgr.G00039	RLK	Unknown	RLK_LRR-VIII	TM_K	Chr07	gene	426040	433769	+	PF07714	GO:0006468,GO:0004672	Leucine-rich repeat protein kinase family protein	Eucgr.G00039.1.p	DOWN	Mangwanda	C. austroafricana	Resistent	2015	10.1186/s12864-015-1529-x	Cluster 68
Eucgr.G00039	RLK	Unknown	RLK_LRR-VIII	TM_K	Chr07	gene	426040	433769	+	PF07714	GO:0006468,GO:0004672	Leucine-rich repeat protein kinase family protein	Eucgr.G00039.1.p	DOWN	Oates	L. invasa	Resistent	2015	10.1093/pcp/pcv064	Cluster 68
Eucgr.G00040	RLK	Unknown	RLK_LRR-VIII	TM_K	Chr07	gene	435966	444095	+	PF00069	GO:0006468,GO:0005524,GO:0004672	Leucine-rich repeat protein kinase family protein	Eucgr.G00040.1.p	DOWN	Mangwanda	C. austroafricana	Resistent	2015	10.1186/s12864-015-1529-x	Cluster 68
Eucgr.G00040	RLK	Unknown	RLK_LRR-VIII	TM_K	Chr07	gene	435966	444095	+	PF00069	GO:0006468,GO:0005524,GO:0004672	Leucine-rich repeat protein kinase family protein	Eucgr.G00040.1.p	DOWN	Oates	L. invasa	Resistent	2015	10.1093/pcp/pcv064	Cluster 68
Eucgr.G00041	RLK	Unknown	RLK_LRR-VIII	TM_K	Chr07	gene	446606	454202	+	PF07714	GO:0006468,GO:0004672	Leucine-rich repeat protein kinase family protein	Eucgr.G00041.1.p	DOWN	Santos	A. psidii	Susceptible	2020	10.1007/s11103-020-01030-x	Cluster 68
Eucgr.G00041	RLK	Unknown	RLK_LRR-VIII	TM_K	Chr07	gene	446606	454202	+	PF07714	GO:0006468,GO:0004672	Leucine-rich repeat protein kinase family protein	Eucgr.G00041.1.p	DOWN	Oates	L. invasa	Resistent	2015	10.1093/pcp/pcv064	Cluster 68
Eucgr.G00043	RLK	Unknown	RLK_LRR-VIII	TM_K	Chr07	gene	467228	474968	+	PF00069	GO:0006468,GO:0005524,GO:0004672	Leucine-rich repeat protein kinase family protein	Eucgr.G00043.1.p	UP	Xiaohui	R. solanacearum		2022	10.1007/s00438-022-01903-4	Cluster 68
Eucgr.G00190	RLK	Unknown	RLK_LRR-XII	TM_K_LRR	Chr07	gene	2620769	2625097	-	PF00560,PF07714,PF12799	GO:0005515,GO:0006468,GO:0004672	Leucine-rich repeat receptor-like protein kinase family protein	Eucgr.G00190.1.p							Singleton
Eucgr.G00319	RLK	Unknown	RLK_LRR-XI	TM_K_LRR	Chr07	gene	4914323	4918530	+	PF08263,PF00069	GO:0006468,GO:0005524,GO:0004672	Leucine-rich receptor-like protein kinase family protein	Eucgr.G00319.1.p	DOWN	Mangwanda	C. austroafricana	Resistent	2015	10.1186/s12864-015-1529-x	Singleton
Eucgr.G00395	RLK	Unknown	RLK_LRR-XII	TM_K_LRR	Chr07	gene	6561181	6564225	-	PF08263,PF13855,PF00069	GO:0005515,GO:0006468,GO:0005524,GO:0004672	Leucine-rich repeat protein kinase family protein	Eucgr.G00395.1.p							Singleton
Eucgr.G00456	RLK	Unknown	RLK_LRR-XII	TM_K_LRR	Chr07	gene	29808857	29811955	-	PF00560,PF08263,PF13855,PF00069	GO:0005515,GO:0006468,GO:0005524,GO:0004672	Leucine-rich repeat protein kinase family protein	Eucgr.G00456.1.p							Singleton
Eucgr.G00600	RLK	Unknown	RLK_LRR-XII	TM_LRR	Chr07	gene	8858161	8861263	+	PF08263,PF07714,PF13855	GO:0006468,GO:0004672,GO:0005515	Leucine-rich repeat protein kinase family protein	Eucgr.G00600.1.p							Singleton
Eucgr.G00662	RLK	Unknown	RLK_LRR-XII	TM_K_LRR	Chr07	gene	9795117	9798349	+	PF00560,PF08263,PF13855,PF00069	GO:0005515,GO:0006468,GO:0005524,GO:0004672	Leucine-rich repeat protein kinase family protein	Eucgr.G00662.1.p							Cluster 69
Eucgr.G00670	RLK	Unknown	RLK_LRR-XII	TM_K_LRR	Chr07	gene	9841096	9844578	+	PF08263,PF00069	GO:0006468,GO:0005524,GO:0004672	Leucine-rich repeat protein kinase family protein	Eucgr.G00670.1.p							Cluster 69
Eucgr.G00673	RLK	Unknown	RLK_LRR-XII	TM_K_LRR	Chr07	gene	9891866	9894893	+	PF08263,PF13855,PF00069	GO:0005515,GO:0006468,GO:0005524,GO:0004672	Leucine-rich repeat protein kinase family protein	Eucgr.G00673.1.p	DOWN	Xiaohui	R. solanacearum		2022	10.1007/s00438-022-01903-4	Cluster 69
Eucgr.G00734	RLP	Unknown	RLP_LRR	TM_LRR	Chr07	gene	10890639	10893386	-	PF08263,PF00560,PF13855	GO:0005515	disease resistance family protein / LRR family protein	Eucgr.G00734.1.p							Cluster 70
Eucgr.G00735	RLP	Unknown	RLP_LRR	TM_LRR	Chr07	gene	11018551	11021199	+	PF08263,PF00560,PF13855	GO:0005515	disease resistance family protein / LRR family protein	Eucgr.G00735.1.p							Cluster 70
Eucgr.G00739	RLP	Unknown	RLP_LRR	TM_LRR	Chr07	gene	11127956	11130643	+	PF08263,PF00560,PF13855	GO:0005515	disease resistance family protein / LRR family protein	Eucgr.G00739.1.p							Cluster 70
Eucgr.G00748	RLP	Unknown	RLP_LRR	TM_LRR	Chr07	gene	11365324	11368494	+	PF08263,PF00560,PF13855	GO:0005515	disease resistance family protein / LRR family protein	Eucgr.G00748.1.p							Cluster 71
Eucgr.G00754	RLK	Unknown	RLK_LRR-XII	TM_K_LRR	Chr07	gene	11567163	11573716	-	PF00560,PF08263,PF00069	GO:0005515,GO:0006468,GO:0005524,GO:0004672	Leucine-rich repeat protein kinase family protein	Eucgr.G00754.1.p							Cluster 71
Eucgr.G00758	RLK	Unknown	RLK_LRR-XII	TM_K_LRR	Chr07	gene	11613806	11617200	+	PF08263,PF00560,PF13855,PF00069	GO:0005515,GO:0006468,GO:0005524,GO:0004672	Leucine-rich repeat protein kinase family protein	Eucgr.G00758.1.p							Cluster 71
Eucgr.G00765	RLK	Unknown	RLK_LRR-XII	TM_K_LRR	Chr07	gene	11677754	11681113	+	PF00560,PF00069	GO:0005515,GO:0006468,GO:0005524,GO:0004672	Leucine-rich repeat protein kinase family protein	Eucgr.G00765.1.p	DOWN	Oates	L. invasa	Resistent	2015	10.1093/pcp/pcv064	Cluster 71
Eucgr.G00848	RLK	Unknown	RLK_LRR-XII	TM_K_LRR	Chr07	gene	13071684	13074981	+	PF08263,PF00069	GO:0006468,GO:0005524,GO:0004672	Leucine-rich repeat protein kinase family protein	Eucgr.G00848.1.p							Singleton
Eucgr.G00897	RLP	Unknown	RLP_LRR	TM_LRR	Chr07	gene	14262406	14265498	+	PF08263,PF00560,PF13855	GO:0005515	disease resistance family protein / LRR family protein	Eucgr.G00897.1.p	UP	Santos	A. psidii	Susceptible	2020	10.1007/s11103-020-01030-x	Singleton
Eucgr.G00996	RLP	Unknown	RLP_LRR	TM_LRR	Chr11	gene	7824898	7829065	-	PF08263,PF00560	GO:0005515	receptor like protein 7	Eucgr.G00996.2.p							Singleton
Eucgr.G01055	RLK	Unknown	RLK_LRR-VIII	TM_K_LRR_Malec	Chr07	gene	16445303	16459100	-	PF00560,PF13855,PF11721,PF00069	GO:0005515,GO:0006468,GO:0005524,GO:0004672	Leucine-rich repeat transmembrane protein kinase	Eucgr.G01055.1.p							Singleton
Eucgr.G01123	RLK	Unknown	RLK_LRR-XI	TM_K	Chr07	gene	17124336	17128126	+	PF00560,PF00069	GO:0005515,GO:0006468,GO:0005524,GO:0004672	Leucine-rich receptor-like protein kinase family protein	Eucgr.G01123.1.p	UP	Santos	A. psidii	Susceptible	2020	10.1007/s11103-020-01030-x	Cluster 72
Eucgr.G01123	RLK	Unknown	RLK_LRR-XI	TM_K	Chr07	gene	17124336	17128126	+	PF00560,PF00069	GO:0005515,GO:0006468,GO:0005524,GO:0004672	Leucine-rich receptor-like protein kinase family protein	Eucgr.G01123.1.p	UP	Mangwanda	C. austroafricana	Resistent	2015	10.1186/s12864-015-1529-x	Cluster 72
Eucgr.G01123	RLK	Unknown	RLK_LRR-XI	TM_K	Chr07	gene	17124336	17128126	+	PF00560,PF00069	GO:0005515,GO:0006468,GO:0005524,GO:0004672	Leucine-rich receptor-like protein kinase family protein	Eucgr.G01123.1.p	UP	Mangwanda	C. austroafricana	Susceptible	2015	10.1186/s12864-015-1529-x	Cluster 72
Eucgr.G01139	RLK	Unknown	RLK_LRR-XII	TM_K_LRR	Chr07	gene	17306416	17309091	+	PF08263,PF00560,PF07714,PF13855	GO:0005515,GO:0006468,GO:0004672	Leucine-rich repeat protein kinase family protein	Eucgr.G01139.1.p							Cluster 72
Eucgr.G01141	RLK	Unknown	RLK_LRR-XII	TM_K	Chr07	gene	17333576	17337882	+	PF00560,PF00069	GO:0005515,GO:0006468,GO:0005524,GO:0004672	Leucine-rich repeat protein kinase family protein	Eucgr.G01141.1.p							Cluster 72
Eucgr.G01147	RLK	Unknown	RLK_LRR-XII	TM_K_LRR	Chr07	gene	17425342	17429870	+	PF00560,PF08263,PF00069	GO:0005515,GO:0006468,GO:0005524,GO:0004672	Leucine-rich repeat protein kinase family protein	Eucgr.G01147.1.p							Cluster 72
Eucgr.G01149	RLK	Unknown	RLK_LRR-XII	TM_K_LRR	Chr07	gene	17445733	17450165	+	PF08263,PF00560,PF00069,PF13855	GO:0005515,GO:0006468,GO:0005524,GO:0004672	Leucine-rich repeat protein kinase family protein	Eucgr.G01149.1.p							Cluster 72
Eucgr.G01151	RLK	Unknown	RLK_LRR-XII	TM_K	Chr07	gene	17546182	17548867	+	PF00560,PF00069	GO:0005515,GO:0006468,GO:0005524,GO:0004672	Leucine-rich repeat protein kinase family protein	Eucgr.G01151.1.p	UP	Santos	A. psidii	Susceptible	2020	10.1007/s11103-020-01030-x	Cluster 72
Eucgr.G01156	RLK	Unknown	RLP_LRR	TM_LRR	Chr07	gene	17650672	17652939	+	PF00560,PF08263,PF13855	GO:0005515	Leucine-rich repeat protein kinase family protein	Eucgr.G01156.1.p							Cluster 72
Eucgr.G01158	RLK	Unknown	RLK_LRR-XII	TM_K_LRR	Chr07	gene	17715666	17720210	+	PF00560,PF08263,PF13855,PF07714	GO:0005515,GO:0006468,GO:0004672	Leucine-rich repeat protein kinase family protein	Eucgr.G01158.1.p							Cluster 72
Eucgr.G01164	RLK	Unknown	RLK_LRR-XII	TM_K_LRR	Chr07	gene	17850841	17855003	+	PF00560,PF13855,PF00069	GO:0005515,GO:0006468,GO:0005524,GO:0004672	Leucine-rich repeat protein kinase family protein	Eucgr.G01164.1.p							Cluster 72
Eucgr.G01170	RLK	Unknown	RLK_LRR-XII	TM_K_LRR	Chr07	gene	17943450	17948747	+	PF08263,PF00560,PF13855,PF07714	GO:0005515,GO:0006468,GO:0004672	Leucine-rich repeat protein kinase family protein	Eucgr.G01170.1.p							Cluster 72
Eucgr.G01172	RLK	Unknown	RLK_LRR-XII	TM_K_LRR	Chr07	gene	17971391	17976169	+	PF08263,PF00560,PF13855,PF00069	GO:0005515,GO:0006468,GO:0005524,GO:0004672	Leucine-rich repeat protein kinase family protein	Eucgr.G01172.1.p							Cluster 72
Eucgr.G01180	RLK	Unknown	RLK_LRR-XII	TM_K_LRR	Chr07	gene	18049957	18055223	+	PF00560,PF08263,PF13855,PF00069	GO:0005515,GO:0006468,GO:0005524,GO:0004672	Leucine-rich repeat protein kinase family protein	Eucgr.G01180.1.p							Cluster 72
Eucgr.G01237	RLK	Unknown	RLK_LRR-XII	TM_K_LRR	Chr07	gene	19112983	19115595	+	PF00560,PF08263,PF07714	GO:0005515,GO:0006468,GO:0004672	Leucine-rich repeat protein kinase family protein	Eucgr.G01237.1.p							Singleton
Eucgr.G01270	RLK	Unknown	RLK_LRR-XII	TM_K_LRR	Chr07	gene	19576938	19581136	+	PF00560,PF13855,PF00069	GO:0005515,GO:0006468,GO:0005524,GO:0004672	Leucine-rich repeat protein kinase family protein	Eucgr.G01270.1.p	UP	Mangwanda	C. austroafricana	Resistent	2015	10.1186/s12864-015-1529-x	Singleton
Eucgr.G01353	RLK	Unknown	RLK_LRR-III	TM_K_LRR	Chr07	gene	20995403	20999572	+	PF00560,PF08263,PF07714	GO:0005515,GO:0006468,GO:0004672	Leucine-rich repeat protein kinase family protein	Eucgr.G01353.1.p							Singleton
Eucgr.G01747	RLK	Unknown	RLK_LRR-XI	TM_K_LRR	Chr07	gene	33608594	33611875	+	PF08263,PF00560,PF00069,PF13855	GO:0005515,GO:0006468,GO:0005524,GO:0004672	Leucine-rich repeat receptor-like protein kinase family protein	Eucgr.G01747.1.p							Singleton
Eucgr.G01776	RLP	Unknown	RLP_LRR	TM_LRR	Chr07	gene	34215046	34218538	+	PF08263,PF00560,PF13855	GO:0005515	disease resistance family protein / LRR family protein	Eucgr.G01776.1.p	UP	Xiaohui	R. solanacearum		2022	10.1007/s00438-022-01903-4	Singleton
Eucgr.G01776	RLP	Unknown	RLP_LRR	TM_LRR	Chr07	gene	34215046	34218538	+	PF08263,PF00560,PF13855	GO:0005515	disease resistance family protein / LRR family protein	Eucgr.G01776.1.p	DOWN	Xiaohui	R. solanacearum		2022	10.1007/s00438-022-01903-4	Singleton
Eucgr.G01972	RLP	Unknown	RLP_LRR	TM_LRR	Chr07	gene	38143974	38147127	+	PF08263,PF13855	GO:0005515	disease resistance family protein / LRR family protein	Eucgr.G01972.1.p	UP	Santos	A. psidii	Susceptible	2020	10.1007/s11103-020-01030-x	Singleton
Eucgr.G02015	RLK	Unknown	RLK_LRR-III	TM_K_LRR	Chr07	gene	39156340	39158416	-	PF08263,PF13855,PF00069	GO:0005515,GO:0006468,GO:0005524,GO:0004672	Leucine-rich repeat protein kinase family protein	Eucgr.G02015.1.p							Singleton
Eucgr.G02065	RLK	Unknown	RLK_LRR-X	TM_K_LRR	Chr07	gene	40291230	40295565	+	PF13306,PF00560,PF08263,PF00069,PF13855	GO:0005515,GO:0006468,GO:0005524,GO:0004672	BRI1-like 2	Eucgr.G02065.1.p							Singleton
Eucgr.G02120	RLP	Unknown	RLP_LRR	TM_LRR	Chr07	gene	40936974	40941934	-	PF08263,PF00560,PF13855	GO:0005515	disease resistance family protein / LRR family protein	Eucgr.G02120.1.p	UP	Santos	A. psidii	Susceptible	2020	10.1007/s11103-020-01030-x	Cluster 73
Eucgr.G02123	RLP	Unknown	RLP_LRR	TM_LRR	Chr07	gene	40958843	40961771	-	PF00560,PF13855	GO:0005515	disease resistance family protein / LRR family protein	Eucgr.G02123.1.p							Cluster 73
Eucgr.G02131	RLP	Unknown	RLP_LRR	TM_LRR	Chr07	gene	41055708	41059062	-	PF00560,PF08263	GO:0005515	disease resistance family protein / LRR family protein	Eucgr.G02131.1.p	DOWN	Xiaohui	R. solanacearum		2022	10.1007/s00438-022-01903-4	Cluster 73
Eucgr.G02237	RLK	Unknown	RLK_LRR-III	TM_K_LRR	Chr07	gene	42506538	42509156	-	PF08263,PF07714	GO:0006468,GO:0004672	Leucine-rich repeat protein kinase family protein	Eucgr.G02237.1.p	UP	Xiaohui	R. solanacearum		2022	10.1007/s00438-022-01903-4	Singleton
Eucgr.G02274	RLK	Unknown	RLK_LRR-XII	TM_K_LRR	Chr07	gene	43288609	43292230	-	PF00560,PF13855,PF00069	GO:0005515,GO:0006468,GO:0005524,GO:0004672	Leucine-rich repeat receptor-like protein kinase family protein	Eucgr.G02274.1.p							Singleton
Eucgr.G02533	RLK	Unknown	RLK_LRR-VI	TM_K_LRR	Chr07	gene	46145896	46148979	+	PF07714	GO:0006468,GO:0004672	Leucine-rich repeat protein kinase family protein	Eucgr.G02533.1.p	DOWN	Xiaohui	R. solanacearum		2022	10.1007/s00438-022-01903-4	Singleton
Eucgr.G02533	CLK	Unknown	RLK_LRR-VI	TM_K_LRR	Chr07	gene	46145896	46148979	+	PF13855,PF07714	GO:0005515,GO:0006468,GO:0004672	Leucine-rich repeat protein kinase family protein	Eucgr.G02533.1.p	DOWN	Xiaohui	R. solanacearum		2022	10.1007/s00438-022-01903-4	Singleton
Eucgr.G02533	RLK	Unknown	RLK_LRR-VI	TM_K_LRR	Chr07	gene	46145896	46148979	+	PF13855,PF07714	GO:0005515,GO:0006468,GO:0004672	Leucine-rich repeat protein kinase family protein	Eucgr.G02533.1.p	DOWN	Xiaohui	R. solanacearum		2022	10.1007/s00438-022-01903-4	Singleton
Eucgr.G02533	CLK	Unknown	RLK_LRR-VI	TM_K_LRR	Chr07	gene	46145896	46148979	+	PF07714	GO:0006468,GO:0004672	Leucine-rich repeat protein kinase family protein	Eucgr.G02533.1.p	DOWN	Xiaohui	R. solanacearum		2022	10.1007/s00438-022-01903-4	Singleton
Eucgr.G03019	RLK	Unknown	RLK_LRR-XII	TM_K_LRR	Chr07	gene	51434019	51437050	-	PF08263,PF07714,PF13855	GO:0006468,GO:0004672,GO:0005515	Leucine-rich repeat protein kinase family protein	Eucgr.G03019.1.p							Cluster 74
Eucgr.G03049	RLK	Unknown	RLK_LRR-XII	TM_K_LRR	Chr07	gene	51626133	51629154	-	PF00560,PF08263,PF13855,PF07714	GO:0005515,GO:0006468,GO:0004672	Leucine-rich repeat protein kinase family protein	Eucgr.G03049.1.p	DOWN	Oates	L. invasa	Resistent	2015	10.1093/pcp/pcv064	Cluster 74
Eucgr.G03049	RLK	Unknown	RLK_LRR-XII	TM_K_LRR	Chr07	gene	51626133	51629154	-	PF00560,PF08263,PF13855,PF07714	GO:0005515,GO:0006468,GO:0004672	Leucine-rich repeat protein kinase family protein	Eucgr.G03049.1.p	UP	Santos	A. psidii	Susceptible	2020	10.1007/s11103-020-01030-x	Cluster 74
Eucgr.G03050	RLK	Unknown	RLK_LRR-XII	TM_K_LRR	Chr07	gene	51647393	51651083	-	PF13855,PF00069	GO:0005515,GO:0006468,GO:0005524,GO:0004672	Leucine-rich repeat protein kinase family protein	Eucgr.G03050.1.p	UP	Santos	A. psidii	Susceptible	2020	10.1007/s11103-020-01030-x	Cluster 74
Eucgr.G03051	RLK	Unknown	RLK_LRR-XII	TM_K_LRR	Chr07	gene	51687879	51690143	+	PF13855,PF00069	GO:0005515,GO:0006468,GO:0005524,GO:0004672	Leucine-rich repeat protein kinase family protein	Eucgr.G03051.1.p	DOWN	Oates	L. invasa	Resistent	2015	10.1093/pcp/pcv064	Cluster 74
Eucgr.G03051	RLK	Unknown	RLK_LRR-XII	TM_K_LRR	Chr07	gene	51687879	51690143	+	PF13855,PF00069	GO:0005515,GO:0006468,GO:0005524,GO:0004672	Leucine-rich repeat protein kinase family protein	Eucgr.G03051.1.p	UP	Santos	A. psidii	Susceptible	2020	10.1007/s11103-020-01030-x	Cluster 74
Eucgr.G03053	RLK	Unknown	RLK_LRR-XII	TM_K	Chr07	gene	51726043	51729160	-	PF00560,PF00069	GO:0005515,GO:0006468,GO:0005524,GO:0004672	Leucine-rich repeat protein kinase family protein	Eucgr.G03053.1.p	UP	Santos	A. psidii	Susceptible	2020	10.1007/s11103-020-01030-x	Cluster 74
Eucgr.G03054	RLK	Unknown	RLK_LRR-XII	TM_K_LRR	Chr07	gene	51735634	51738771	-	PF00560,PF08263,PF00069	GO:0005515,GO:0006468,GO:0005524,GO:0004672	Leucine-rich repeat protein kinase family protein	Eucgr.G03054.1.p	UP	Santos	A. psidii	Susceptible	2020	10.1007/s11103-020-01030-x	Cluster 74
Eucgr.G03111	RLP	Unknown	RLP_LRR	TM_LRR	Chr07	gene	52159525	52161477	-	PF08263,PF00560	GO:0005515	receptor like protein 43	Eucgr.G03111.1.p							Singleton
Eucgr.G03140	RLK	Unknown	RLK_LRR-VII	TM_K_LRR	Chr07	gene	52419863	52424406	-	PF08263,PF00560,PF07714,PF13855	GO:0005515,GO:0006468,GO:0004672	Leucine-rich repeat protein kinase family protein	Eucgr.G03140.1.p							Cluster 75
Eucgr.G03156	RLP	Unknown	RLP_LRR	TM_LRR	Chr07	gene	52524251	52531621	-	PF08263,PF13855	GO:0005515	disease resistance family protein / LRR family protein	Eucgr.G03156.1.p							Cluster 75
Eucgr.G03159	RLP	Unknown	RLP_LRR	TM_LRR	Chr07	gene	52563670	52566897	-	PF08263,PF00560,PF13855	GO:0005515	disease resistance family protein / LRR family protein	Eucgr.G03159.1.p							Cluster 75
Eucgr.G03160	RLP	Unknown	RLP_LRR	TM_LRR	Chr07	gene	52587544	52590688	-	PF08263,PF00560,PF13855	GO:0005515	disease resistance family protein / LRR family protein	Eucgr.G03160.1.p							Cluster 75
Eucgr.G03161	RLP	Unknown	RLP_LRR	TM_LRR	Chr07	gene	52628001	52631440	-	PF08263,PF13855	GO:0005515	disease resistance family protein / LRR family protein	Eucgr.G03161.1.p							Cluster 75
Eucgr.G03338	RLP	Unknown	RLP_LRR	TM_LRR	Chr07	gene	54114048	54117170	-	PF08263,PF00560,PF13855	GO:0005515	disease resistance family protein / LRR family protein	Eucgr.G03338.1.p	DOWN	Mangwanda	C. austroafricana	Resistent	2015	10.1186/s12864-015-1529-x	Cluster 76
Eucgr.G03338	RLP	Unknown	RLP_LRR	TM_LRR	Chr07	gene	54114048	54117170	-	PF08263,PF00560,PF13855	GO:0005515	disease resistance family protein / LRR family protein	Eucgr.G03338.1.p	DOWN	Xiaohui	R. solanacearum		2022	10.1007/s00438-022-01903-4	Cluster 76
Eucgr.G03347	RLP	Unknown	RLP_LRR	TM_LRR	Chr07	gene	54159363	54162331	-	PF13855	GO:0005515	disease resistance family protein / LRR family protein	Eucgr.G03347.1.p							Cluster 76
Eucgr.H00009	RLK	Unknown	RLK_LRR-IX	TM_K_LRR	Chr08	gene	3850356	3854358	+	PF08263,PF00560,PF13855,PF07714	GO:0005515,GO:0006468,GO:0004672	Leucine-rich repeat protein kinase family protein	Eucgr.H00009.1.p							Singleton
Eucgr.H00104	RLK	Unknown	RLK_LRR-XI	TM_K_LRR	Chr08	gene	4807792	4812669	-	PF00560,PF08263,PF13855,PF00069	GO:0005515,GO:0006468,GO:0005524,GO:0004672	Leucine-rich repeat receptor-like protein kinase family protein	Eucgr.H00104.1.p							Singleton
Eucgr.H00539	RLK	Unknown	RLK_LRR-III	TM_K_LRR	Chr08	gene	7757571	7760888	-	PF08263,PF00069	GO:0006468,GO:0005524,GO:0004672	receptor-like kinase 1	Eucgr.H00539.1.p	UP	Xiaohui	R. solanacearum		2022	10.1007/s00438-022-01903-4	Singleton
Eucgr.H00700	RLK	Unknown	RLK_LRR-XII	TM_K_LRR	Chr08	gene	9516913	9520917	+	PF08263,PF00560,PF13855,PF00069	GO:0005515,GO:0006468,GO:0005524,GO:0004672	Leucine-rich repeat receptor-like protein kinase family protein	Eucgr.H00700.1.p	DOWN	Oates	L. invasa	Resistent	2015	10.1093/pcp/pcv064	Cluster 77
Eucgr.H00700	RLK	Unknown	RLK_LRR-XII	TM_K_LRR	Chr08	gene	9516913	9520917	+	PF08263,PF00560,PF13855,PF00069	GO:0005515,GO:0006468,GO:0005524,GO:0004672	Leucine-rich repeat receptor-like protein kinase family protein	Eucgr.H00700.1.p	DOWN	Mangwanda	C. austroafricana	Resistent	2015	10.1186/s12864-015-1529-x	Cluster 77
Eucgr.H00700	RLK	Unknown	RLK_LRR-XII	TM_K_LRR	Chr08	gene	9516913	9520917	+	PF08263,PF00560,PF13855,PF00069	GO:0005515,GO:0006468,GO:0005524,GO:0004672	Leucine-rich repeat receptor-like protein kinase family protein	Eucgr.H00700.1.p	DOWN	Santos	A. psidii	Susceptible	2020	10.1007/s11103-020-01030-x	Cluster 77
Eucgr.H00703	RLK	Unknown	RLK_LRR-XII	TM_K_LRR	Chr08	gene	9563589	9567076	+	PF08263,PF00560,PF13855,PF00069	GO:0005515,GO:0006468,GO:0005524,GO:0004672	Leucine-rich repeat receptor-like protein kinase family protein	Eucgr.H00703.1.p	DOWN	Mangwanda	C. austroafricana	Susceptible	2015	10.1186/s12864-015-1529-x	Cluster 77
Eucgr.H00703	RLK	Unknown	RLK_LRR-XII	TM_K_LRR	Chr08	gene	9563589	9567076	+	PF08263,PF00560,PF13855,PF00069	GO:0005515,GO:0006468,GO:0005524,GO:0004672	Leucine-rich repeat receptor-like protein kinase family protein	Eucgr.H00703.1.p	DOWN	Mangwanda	C. austroafricana	Resistent	2015	10.1186/s12864-015-1529-x	Cluster 77
Eucgr.H00704	RLK	Unknown	RLK_LRR-XII	TM_K_LRR	Chr08	gene	9582818	9586188	+	PF08263,PF00560,PF13855,PF00069	GO:0005515,GO:0006468,GO:0005524,GO:0004672	Leucine-rich repeat receptor-like protein kinase family protein	Eucgr.H00704.1.p	DOWN	Mangwanda	C. austroafricana	Resistent	2015	10.1186/s12864-015-1529-x	Cluster 77
Eucgr.H00704	RLK	Unknown	RLK_LRR-XII	TM_K_LRR	Chr08	gene	9582818	9586188	+	PF08263,PF00560,PF13855,PF00069	GO:0005515,GO:0006468,GO:0005524,GO:0004672	Leucine-rich repeat receptor-like protein kinase family protein	Eucgr.H00704.1.p	DOWN	Oates	L. invasa	Resistent	2015	10.1093/pcp/pcv064	Cluster 77
Eucgr.H00705	RLK	Unknown	RLK_LRR-XII	TM_K_LRR	Chr08	gene	9596402	9599813	+	PF08263,PF13855,PF00069	GO:0005515,GO:0006468,GO:0005524,GO:0004672	Leucine-rich repeat receptor-like protein kinase family protein	Eucgr.H00705.1.p	DOWN	Oates	L. invasa	Resistent	2015	10.1093/pcp/pcv064	Cluster 77
Eucgr.H00707	RLK	Unknown	RLK_LRR-XII	TM_K_LRR	Chr08	gene	9621912	9625470	+	PF08263,PF00560,PF13855,PF00069	GO:0005515,GO:0006468,GO:0005524,GO:0004672	Leucine-rich repeat receptor-like protein kinase family protein	Eucgr.H00707.1.p	UP	Santos	A. psidii	Susceptible	2020	10.1007/s11103-020-01030-x	Cluster 77
Eucgr.H00707	RLK	Unknown	RLK_LRR-XII	TM_K_LRR	Chr08	gene	9621912	9625470	+	PF08263,PF00560,PF13855,PF00069	GO:0005515,GO:0006468,GO:0005524,GO:0004672	Leucine-rich repeat receptor-like protein kinase family protein	Eucgr.H00707.1.p	DOWN	Xiaohui	R. solanacearum		2022	10.1007/s00438-022-01903-4	Cluster 77
Eucgr.H00707	RLK	Unknown	RLK_LRR-XII	TM_K_LRR	Chr08	gene	9621912	9625470	+	PF08263,PF00560,PF13855,PF00069	GO:0005515,GO:0006468,GO:0005524,GO:0004672	Leucine-rich repeat receptor-like protein kinase family protein	Eucgr.H00707.1.p	DOWN	Mangwanda	C. austroafricana	Resistent	2015	10.1186/s12864-015-1529-x	Cluster 77
Eucgr.H00707	RLK	Unknown	RLK_LRR-XII	TM_K_LRR	Chr08	gene	9621912	9625470	+	PF08263,PF00560,PF07714,PF13855	GO:0005515,GO:0006468,GO:0004672	Leucine-rich repeat receptor-like protein kinase family protein	Eucgr.H00707.1.p	UP	Santos	A. psidii	Susceptible	2020	10.1007/s11103-020-01030-x	Cluster 77
Eucgr.H00707	RLK	Unknown	RLK_LRR-XII	TM_K_LRR	Chr08	gene	9621912	9625470	+	PF08263,PF00560,PF07714,PF13855	GO:0005515,GO:0006468,GO:0004672	Leucine-rich repeat receptor-like protein kinase family protein	Eucgr.H00707.1.p	DOWN	Xiaohui	R. solanacearum		2022	10.1007/s00438-022-01903-4	Cluster 77
Eucgr.H00707	RLK	Unknown	RLK_LRR-XII	TM_K_LRR	Chr08	gene	9621912	9625470	+	PF08263,PF00560,PF07714,PF13855	GO:0005515,GO:0006468,GO:0004672	Leucine-rich repeat receptor-like protein kinase family protein	Eucgr.H00707.1.p	DOWN	Mangwanda	C. austroafricana	Susceptible	2015	10.1186/s12864-015-1529-x	Cluster 77
Eucgr.H00707	RLK	Unknown	RLK_LRR-XII	TM_K_LRR	Chr08	gene	9621912	9625470	+	PF08263,PF00560,PF13855,PF00069	GO:0005515,GO:0006468,GO:0005524,GO:0004672	Leucine-rich repeat receptor-like protein kinase family protein	Eucgr.H00707.1.p	DOWN	Mangwanda	C. austroafricana	Susceptible	2015	10.1186/s12864-015-1529-x	Cluster 77
Eucgr.H00707	RLK	Unknown	RLK_LRR-XII	TM_K_LRR	Chr08	gene	9621912	9625470	+	PF08263,PF00560,PF07714,PF13855	GO:0005515,GO:0006468,GO:0004672	Leucine-rich repeat receptor-like protein kinase family protein	Eucgr.H00707.1.p	DOWN	Mangwanda	C. austroafricana	Resistent	2015	10.1186/s12864-015-1529-x	Cluster 77
Eucgr.H00710	RLK	Unknown	RLK_LRR-XII	TM_K_LRR	Chr08	gene	9652678	9656274	+	PF08263,PF00560,PF00069,PF13855	GO:0005515,GO:0006468,GO:0005524,GO:0004672	Leucine-rich repeat receptor-like protein kinase family protein	Eucgr.H00710.1.p	UP	Santos	A. psidii	Susceptible	2020	10.1007/s11103-020-01030-x	Cluster 77
Eucgr.H00710	RLK	Unknown	RLK_LRR-XII	TM_K_LRR	Chr08	gene	9652678	9656274	+	PF08263,PF00560,PF00069,PF13855	GO:0005515,GO:0006468,GO:0005524,GO:0004672	Leucine-rich repeat receptor-like protein kinase family protein	Eucgr.H00710.1.p	DOWN	Oates	L. invasa	Resistent	2015	10.1093/pcp/pcv064	Cluster 77
Eucgr.H00710	RLK	Unknown	RLK_LRR-XII	TM_K_LRR	Chr08	gene	9652678	9656274	+	PF08263,PF00560,PF00069,PF13855	GO:0005515,GO:0006468,GO:0005524,GO:0004672	Leucine-rich repeat receptor-like protein kinase family protein	Eucgr.H00710.1.p	DOWN	Mangwanda	C. austroafricana	Resistent	2015	10.1186/s12864-015-1529-x	Cluster 77
Eucgr.H00710	RLK	Unknown	RLK_LRR-XII	TM_K_LRR	Chr08	gene	9652678	9656274	+	PF08263,PF00560,PF00069,PF13855	GO:0005515,GO:0006468,GO:0005524,GO:0004672	Leucine-rich repeat receptor-like protein kinase family protein	Eucgr.H00710.1.p	DOWN	Mangwanda	C. austroafricana	Susceptible	2015	10.1186/s12864-015-1529-x	Cluster 77
Eucgr.H00710	RLK	Unknown	RLK_LRR-XII	TM_K_LRR	Chr08	gene	9652678	9656274	+	PF08263,PF00560,PF00069,PF13855	GO:0005515,GO:0006468,GO:0005524,GO:0004672	Leucine-rich repeat receptor-like protein kinase family protein	Eucgr.H00710.1.p	DOWN	Xiaohui	R. solanacearum		2022	10.1007/s00438-022-01903-4	Cluster 77
Eucgr.H00798	RLK	Unknown	RLK_LRR-I	TM_K_LRR_MalecLike	Chr08	gene	10395340	10400963	-	PF11721,PF13855,PF00069	GO:0005515,GO:0006468,GO:0005524,GO:0004672	Leucine-rich repeat protein kinase family protein	Eucgr.H00798.1.p	UP	Xiaohui	R. solanacearum		2022	10.1007/s00438-022-01903-4	Cluster 78
Eucgr.H00798	RLK	Unknown	RLK_LRR-I	TM_K_LRR_MalecLike	Chr08	gene	10395340	10400963	-	PF11721,PF13855,PF00069	GO:0005515,GO:0006468,GO:0005524,GO:0004672	Leucine-rich repeat protein kinase family protein	Eucgr.H00798.1.p	DOWN	Xiaohui	R. solanacearum		2022	10.1007/s00438-022-01903-4	Cluster 78
Eucgr.H00812	RLK	Unknown	RLK_LRR-III	TM_K_LRR	Chr08	gene	10483463	10487516	-	PF08263,PF13855,PF07714	GO:0005515,GO:0006468,GO:0004672	transmembrane kinase-like 1	Eucgr.H00812.1.p							Cluster 78
Eucgr.H00814	RLK	Unknown	RLK_LRR-XI	TM_K_LRR	Chr08	gene	10510259	10513980	+	PF00560,PF13855,PF00069	GO:0005515,GO:0006468,GO:0005524,GO:0004672	Leucine-rich repeat transmembrane protein kinase family protein	Eucgr.H00814.1.p	UP	Xiaohui	R. solanacearum		2022	10.1007/s00438-022-01903-4	Cluster 78
Eucgr.H00941	RLK	Unknown	RLK_LRR-XII	TM_K_LRR	Chr06	gene	7755818	7759571	-	PF08263,PF13855,PF00069	GO:0005515,GO:0006468,GO:0005524,GO:0004672	Leucine-rich repeat receptor-like protein kinase family protein	Eucgr.H00941.1.p	DOWN	Oates	L. invasa	Resistent	2015	10.1093/pcp/pcv064	Cluster 49
Eucgr.H00942	RLK	Unknown	RLK_LRR-XII	TM_K_LRR	Chr06	gene	7786880	7790758	-	PF08263,PF13855,PF00069	GO:0005515,GO:0006468,GO:0005524,GO:0004672	Leucine-rich repeat receptor-like protein kinase family protein	Eucgr.H00942.1.p	DOWN	Oates	L. invasa	Resistent	2015	10.1093/pcp/pcv064	Cluster 49
Eucgr.H00942	RLK	Unknown	RLK_LRR-XII	TM_K_LRR	Chr06	gene	7786880	7790758	-	PF08263,PF13855,PF00069	GO:0005515,GO:0006468,GO:0005524,GO:0004672	Leucine-rich repeat receptor-like protein kinase family protein	Eucgr.H00942.1.p	DOWN	Xiaohui	R. solanacearum		2022	10.1007/s00438-022-01903-4	Cluster 49
Eucgr.H00944	RLK	Unknown	RLK_LRR-XII	TM_K_LRR	Chr06	gene	7820704	7824305	-	PF13855,PF00069	GO:0005515,GO:0006468,GO:0005524,GO:0004672	Leucine-rich repeat receptor-like protein kinase family protein	Eucgr.H00944.1.p	DOWN	Oates	L. invasa	Resistent	2015	10.1093/pcp/pcv064	Cluster 49
Eucgr.H00944	RLK	Unknown	RLK_LRR-XII	TM_K_LRR	Chr06	gene	7820704	7824305	-	PF13855,PF00069	GO:0005515,GO:0006468,GO:0005524,GO:0004672	Leucine-rich repeat receptor-like protein kinase family protein	Eucgr.H00944.1.p	DOWN	Mangwanda	C. austroafricana	Resistent	2015	10.1186/s12864-015-1529-x	Cluster 49
Eucgr.H00949	RLK	Unknown	RLK_LRR-XII	TM_K_LRR	Chr06	gene	7852826	7856009	-	PF08263,PF00560,PF13855,PF00069	GO:0005515,GO:0006468,GO:0005524,GO:0004672	Leucine-rich repeat receptor-like protein kinase family protein	Eucgr.H00949.1.p	UP	Santos	A. psidii	Susceptible	2020	10.1007/s11103-020-01030-x	Cluster 49
Eucgr.H00949	RLK	Unknown	RLK_LRR-XII	TM_K_LRR	Chr06	gene	7852826	7856009	-	PF08263,PF00560,PF13855,PF00069	GO:0005515,GO:0006468,GO:0005524,GO:0004672	Leucine-rich repeat receptor-like protein kinase family protein	Eucgr.H00949.1.p	DOWN	Xiaohui	R. solanacearum		2022	10.1007/s00438-022-01903-4	Cluster 49
Eucgr.H00949	RLK	Unknown	RLK_LRR-XII	TM_K_LRR	Chr06	gene	7852826	7856009	-	PF08263,PF00560,PF13855,PF00069	GO:0005515,GO:0006468,GO:0005524,GO:0004672	Leucine-rich repeat receptor-like protein kinase family protein	Eucgr.H00949.1.p	DOWN	Mangwanda	C. austroafricana	Resistent	2015	10.1186/s12864-015-1529-x	Cluster 49
Eucgr.H00959	RLP	Unknown	RLP_LRR	TM_LRR	Chr06	gene	7944674	7946893	-	PF08263,PF13855	GO:0005515	receptor like protein 27	Eucgr.H00959.1.p							Cluster 49
Eucgr.H00963	RLK	Unknown	RLK_LRR-XI	TM_K_LRR	Chr06	gene	7997390	8000900	+	PF08263,PF00069,PF13855	GO:0006468,GO:0005524,GO:0004672,GO:0005515	Leucine-rich receptor-like protein kinase family protein	Eucgr.H00963.1.p	DOWN	Oates	L. invasa	Resistent	2015	10.1093/pcp/pcv064	Cluster 49
Eucgr.H00963	RLK	Unknown	RLK_LRR-XI	TM_K_LRR	Chr06	gene	7997390	8000900	+	PF08263,PF13855,PF00069	GO:0005515,GO:0006468,GO:0005524,GO:0004672	Leucine-rich receptor-like protein kinase family protein	Eucgr.H00963.1.p	DOWN	Oates	L. invasa	Resistent	2015	10.1093/pcp/pcv064	Cluster 49
Eucgr.H00964	RLK	Unknown	RLK_LRR-XI	TM_K_LRR	Chr06	gene	8002535	8005939	-	PF08263,PF13855,PF00069	GO:0005515,GO:0006468,GO:0005524,GO:0004672	Leucine-rich receptor-like protein kinase family protein	Eucgr.H00964.1.p							Cluster 49
Eucgr.H00978	RLP	Unknown	RLP_LRR	TM_LRR	Chr06	gene	8123068	8125310	+	PF08263,PF00560,PF13855	GO:0005515	receptor like protein 43	Eucgr.H00978.1.p							Cluster 49
Eucgr.H00982	RLP	Unknown	RLP_LRR	TM_LRR	Chr06	gene	8138805	8141594	-	PF00560,PF13855	GO:0005515	receptor like protein 33	Eucgr.H00982.1.p	DOWN	Mangwanda	C. austroafricana	Resistent	2015	10.1186/s12864-015-1529-x	Cluster 49
Eucgr.H00985	RLP	Unknown	RLP_LRR	TM_LRR	Chr06	gene	8159380	8162116	-	PF08263,PF00560,PF13855	GO:0005515	receptor like protein 12	Eucgr.H00985.1.p							Cluster 49
Eucgr.H00990	RLP	Unknown	RLP_LRR	TM_LRR	Chr06	gene	8195401	8198139	-	PF08263,PF13855	GO:0005515	receptor like protein 33	Eucgr.H00990.1.p							Cluster 49
Eucgr.H00992	RLP	Unknown	RLP_LRR	TM_LRR	Chr06	gene	8206864	8208050	-	PF00560,PF13855	GO:0005515	receptor like protein 27	Eucgr.H00992.1.p	DOWN	Mangwanda	C. austroafricana	Resistent	2015	10.1186/s12864-015-1529-x	Cluster 49
Eucgr.H00992	RLP	Unknown	RLP_LRR	TM_LRR	Chr06	gene	8206864	8208050	-	PF00560,PF13855	GO:0005515	receptor like protein 27	Eucgr.H00992.1.p	DOWN	Mangwanda	C. austroafricana	Susceptible	2015	10.1186/s12864-015-1529-x	Cluster 49
Eucgr.H01044	RLP	Unknown	RLP_LRR	TM_LRR	Chr08	gene	12062150	12065374	-	PF08263,PF00560,PF13855	GO:0005515	disease resistance family protein / LRR family protein	Eucgr.H01044.1.p							Cluster 79
Eucgr.H01046	RLP	Unknown	RLP_LRR	TM_LRR	Chr08	gene	12102638	12105925	-	PF08263,PF00560,PF13855	GO:0005515	disease resistance family protein / LRR family protein	Eucgr.H01046.1.p							Cluster 79
Eucgr.H01380	RLP	Unknown	RLP_LRR	TM_LRR	Chr08	gene	17534783	17537457	+	PF00560,PF13855	GO:0005515	Leucine-rich repeat (LRR) family protein	Eucgr.H01380.1.p							Singleton
Eucgr.H01441	RLK	Unknown	RLK_LRR-XI	TM_K_LRR	Chr08	gene	16825954	16828643	-	PF00560,PF00069	GO:0005515,GO:0006468,GO:0005524,GO:0004672	Leucine-rich repeat receptor-like protein kinase family protein	Eucgr.H01441.1.p							Singleton
Eucgr.H01783	RLP	Unknown	RLP_LRR	TM	Chr08	gene	23683765	23685686	-			Leucine-rich repeat protein kinase family protein	Eucgr.H01783.1.p							Singleton
Eucgr.H02328	RLP	Unknown	RLP_LRR	TM_LRR	Chr08	gene	29777426	29780046	-	PF08263,PF13855	GO:0005515	Leucine-rich repeat receptor-like protein kinase family protein	Eucgr.H02328.1.p	UP	Mangwanda	C. austroafricana	Resistent	2015	10.1186/s12864-015-1529-x	Singleton
Eucgr.H02351	RLK	Unknown	RLK_LRR-XI	TM_K_LRR	Chr08	gene	30370124	30374082	-	PF08263,PF00560,PF13855,PF00069	GO:0005515,GO:0006468,GO:0005524,GO:0004672	HAESA-like 2	Eucgr.H02351.1.p							Cluster 81
Eucgr.H02353	RLK	Unknown	RLK_LRR-XI	TM_K_LRR	Chr08	gene	30411226	30415152	-	PF08263,PF00560,PF13855,PF00069	GO:0005515,GO:0006468,GO:0005524,GO:0004672	HAESA-like 2	Eucgr.H02353.1.p	DOWN	Oates	L. invasa	Resistent	2015	10.1093/pcp/pcv064	Cluster 81
Eucgr.H02353	RLK	Unknown	RLK_LRR-XI	TM_K_LRR	Chr08	gene	30411226	30415152	-	PF08263,PF00560,PF00069,PF13855	GO:0005515,GO:0006468,GO:0005524,GO:0004672	HAESA-like 2	Eucgr.H02353.1.p	DOWN	Oates	L. invasa	Resistent	2015	10.1093/pcp/pcv064	Cluster 81
Eucgr.H02383	RLK	Unknown	RLK_LRR-XI	TM_K_LRR	Chr08	gene	31052726	31056572	-	PF13855,PF07714	GO:0005515,GO:0006468,GO:0004672	Leucine-rich receptor-like protein kinase family protein	Eucgr.H02383.1.p							Singleton
Eucgr.H02547	RLK	Unknown	RLK_LRR-II	TM_K_LRR	Chr08	gene	33901754	33907469	-	PF13855,PF08263,PF00069	GO:0005515,GO:0006468,GO:0005524,GO:0004672	NSP-interacting kinase 3	Eucgr.H02547.1.p							Singleton
Eucgr.H02591	RLK	Unknown	RLK_LRR-IX	TM_K_LRR	Chr08	gene	34845805	34849134	-	PF13855,PF07714	GO:0005515,GO:0006468,GO:0004672	Leucine-rich repeat protein kinase family protein	Eucgr.H02591.1.p							Singleton
Eucgr.H02613	RLP	Unknown	RLP_LRR	TM_LRR	Chr08	gene	35169810	35172044	+	PF00560,PF13855	GO:0005515	receptor like protein 33	Eucgr.H02613.1.p							Cluster 82
Eucgr.H02618	RLK	Unknown	RLK_LRR-VII	TM_K_LRR	Chr08	gene	35236789	35240659	-	PF08263,PF00069,PF13855	GO:0006468,GO:0005524,GO:0004672,GO:0005515	Leucine-rich receptor-like protein kinase family protein	Eucgr.H02618.1.p	UP	Xiaohui	R. solanacearum		2022	10.1007/s00438-022-01903-4	Cluster 82
Eucgr.H02618	RLK	Unknown	RLK_LRR-VII	TM_K_LRR	Chr08	gene	35236789	35240659	-	PF08263,PF00069,PF13855	GO:0006468,GO:0005524,GO:0004672,GO:0005515	Leucine-rich receptor-like protein kinase family protein	Eucgr.H02618.1.p	UP	Mangwanda	C. austroafricana	Resistent	2015	10.1186/s12864-015-1529-x	Cluster 82
Eucgr.H02636	RLK	Unknown	RLK_LRR-IX	TM_K_LRR	Chr08	gene	35567156	35570420	-	PF08263,PF13855,PF07714	GO:0005515,GO:0006468,GO:0004672	Leucine-rich repeat protein kinase family protein	Eucgr.H02636.1.p							Cluster 83
Eucgr.H02645	RLK	Unknown	RLK_LRR-IX	TM_K_LRR	Chr08	gene	35747203	35750923	+	PF08263,PF13855,PF07714	GO:0005515,GO:0006468,GO:0004672	Leucine-rich repeat protein kinase family protein	Eucgr.H02645.1.p	DOWN	Xiaohui	R. solanacearum		2022	10.1007/s00438-022-01903-4	Cluster 83
Eucgr.H02645	RLK	Unknown	RLK_LRR-IX	TM_K_LRR	Chr08	gene	35747203	35750923	+	PF08263,PF13855,PF07714	GO:0005515,GO:0006468,GO:0004672	Leucine-rich repeat protein kinase family protein	Eucgr.H02645.1.p	UP	Mangwanda	C. austroafricana	Susceptible	2015	10.1186/s12864-015-1529-x	Cluster 83
Eucgr.H02647	undefined	Unknown	RLK_LRR-IX	TM_K_LRR	Chr08	gene	35794130	35797588	+	PF00560,PF08263,PF13855,PF00069	GO:0005515,GO:0006468,GO:0005524,GO:0004672	Leucine-rich repeat protein kinase family protein	Eucgr.H02647.1.p	UP	Mangwanda	C. austroafricana	Susceptible	2015	10.1186/s12864-015-1529-x	Cluster 83
Eucgr.H02647	undefined	Unknown	RLK_LRR-IX	TM_K_LRR	Chr08	gene	35794130	35797588	+	PF00560,PF08263,PF13855,PF00069	GO:0005515,GO:0006468,GO:0005524,GO:0004672	Leucine-rich repeat protein kinase family protein	Eucgr.H02647.1.p	UP	Santos	A. psidii	Susceptible	2020	10.1007/s11103-020-01030-x	Cluster 83
Eucgr.H02723	CLK	Unknown	RLK_LRR-XII	TM_K_LRR	Chr08	gene	37177389	37181147	-	PF08263,PF13855,PF00069	GO:0005515,GO:0006468,GO:0005524,GO:0004672	Leucine-rich repeat receptor-like protein kinase family protein	Eucgr.H02723.1.p	DOWN	Xiaohui	R. solanacearum		2022	10.1007/s00438-022-01903-4	Singleton
Eucgr.H02840	RLK	Unknown	RLK_LRR-XII	TM_K_LRR	Chr08	gene	39502206	39505258	+	PF00560,PF08263,PF00069,PF13855	GO:0005515,GO:0006468,GO:0005524,GO:0004672	Leucine-rich repeat protein kinase family protein	Eucgr.H02840.1.p							Cluster 84
Eucgr.H02842	RLK	Unknown	RLK_LRR-XII	TM_K_LRR	Chr08	gene	39563141	39566184	+	PF00560,PF08263,PF07714,PF13855	GO:0005515,GO:0006468,GO:0004672	Leucine-rich repeat protein kinase family protein	Eucgr.H02842.1.p							Cluster 84
Eucgr.H02844	RLK	Unknown	RLP_LRR	TM_LRR	Chr08	gene	39594533	39596048	+	PF00560,PF13855	GO:0005515	Leucine-rich repeat protein kinase family protein	Eucgr.H02844.1.p							Cluster 84
Eucgr.H02861	RLK	Unknown	RLK_LRR-XI	TM_K_LRR	Chr08	gene	40019373	40022101	+	PF00560,PF13855,PF07714	GO:0005515,GO:0006468,GO:0004672	Leucine-rich repeat receptor-like protein kinase family protein	Eucgr.H02861.1.p							Singleton
Eucgr.H03210	RLK	Unknown	RLK_LRR-III	TM_K_LRR	Chr07	gene	25673938	25678101	+	PF00560,PF08263,PF07714	GO:0005515,GO:0006468,GO:0004672	Leucine-rich repeat protein kinase family protein	Eucgr.H03210.1.p							Singleton
Eucgr.H03649	RLK	Unknown	RLK_LRR-XII	TM_K_LRR	Chr08	gene	50233063	50236121	+	PF08263,PF00069	GO:0006468,GO:0005524,GO:0004672	Leucine-rich repeat protein kinase family protein	Eucgr.H03649.1.p							Singleton
Eucgr.H03944	RLK	Unknown	RLK_LRR-IV	TM_K_LRR	Chr08	gene	53946079	53949221	-	PF08263,PF00069	GO:0006468,GO:0005524,GO:0004672	Leucine-rich repeat protein kinase family protein	Eucgr.H03944.1.p	DOWN	Xiaohui	R. solanacearum		2022	10.1007/s00438-022-01903-4	Singleton
Eucgr.H03944	RLK	Unknown	RLK_LRR-IV	TM_K_LRR	Chr08	gene	53946079	53949221	-	PF08263,PF00069	GO:0006468,GO:0005524,GO:0004672	Leucine-rich repeat protein kinase family protein	Eucgr.H03944.1.p	UP	Xiaohui	R. solanacearum		2022	10.1007/s00438-022-01903-4	Singleton
Eucgr.H04654	RLK	Unknown	RLK_LRR-III	TM_K_LRR	Chr08	gene	65384652	65389287	-	PF08263,PF13855,PF07714	GO:0005515,GO:0006468,GO:0004672	Leucine-rich repeat protein kinase family protein	Eucgr.H04654.1.p	DOWN	Xiaohui	R. solanacearum		2022	10.1007/s00438-022-01903-4	Singleton
Eucgr.H04654	RLK	Unknown	RLK_LRR-III	TM_K_LRR	Chr08	gene	65384652	65389287	-	PF08263,PF13855,PF07714	GO:0005515,GO:0006468,GO:0004672	Leucine-rich repeat protein kinase family protein	Eucgr.H04654.1.p	UP	Xiaohui	R. solanacearum		2022	10.1007/s00438-022-01903-4	Singleton
Eucgr.H04654	RLK	Unknown	RLK_LRR-III	TM_K_LRR	Chr08	gene	65384652	65389287	-	PF08263,PF13855,PF00069	GO:0005515,GO:0006468,GO:0005524,GO:0004672	Leucine-rich repeat protein kinase family protein	Eucgr.H04654.1.p	DOWN	Xiaohui	R. solanacearum		2022	10.1007/s00438-022-01903-4	Singleton
Eucgr.H04654	RLK	Unknown	RLK_LRR-III	TM_K_LRR	Chr08	gene	65384652	65389287	-	PF08263,PF13855,PF00069	GO:0005515,GO:0006468,GO:0005524,GO:0004672	Leucine-rich repeat protein kinase family protein	Eucgr.H04654.1.p	UP	Xiaohui	R. solanacearum		2022	10.1007/s00438-022-01903-4	Singleton
Eucgr.H04770	RLK	Unknown	RLK_LRR-II	TM_K_LRR	Chr08	gene	66723106	66731232	+	PF00560,PF08263,PF07714	GO:0005515,GO:0006468,GO:0004672	leucine-rich repeat transmembrane protein kinase family protein	Eucgr.H04770.2.p							Singleton
Eucgr.H04970	RLP	Unknown	RLP_LRR	TM_LRR	Chr08	gene	69211924	69215047	-	PF00560,PF08263	GO:0005515	disease resistance family protein / LRR family protein	Eucgr.H04970.1.p							Singleton
Eucgr.H04973	RLK	Unknown	RLK_LRR-XII	TM_K_LRR	Chr07	gene	35904778	35909254	+	PF08263,PF00560,PF13855,PF00069	GO:0005515,GO:0006468,GO:0005524,GO:0004672	Leucine-rich repeat protein kinase family protein	Eucgr.H04973.1.p							Singleton
Eucgr.H04981	RLP	Unknown	RLP_LRR	TM_LRR	Chr07	gene	36214413	36217193	-	PF08263,PF00560,PF13855	GO:0005515	disease resistance family protein / LRR family protein	Eucgr.H04981.1.p							Singleton
Eucgr.H05070	RLK	Unknown	RLK_LRR-II	TM_K_LRR	Chr08	gene	71979629	71987452	-	PF13855,PF00069	GO:0005515,GO:0006468,GO:0005524,GO:0004672	Leucine-rich repeat protein kinase family protein	Eucgr.H05070.1.p	DOWN	Oates	L. invasa	Resistent	2015	10.1093/pcp/pcv064	Singleton
Eucgr.H05070	RLK	Unknown	RLK_LRR-II	TM_K_LRR	Chr08	gene	71979629	71987452	-	PF08263,PF13855,PF00069	GO:0005515,GO:0006468,GO:0005524,GO:0004672	Leucine-rich repeat protein kinase family protein	Eucgr.H05070.1.p	DOWN	Oates	L. invasa	Resistent	2015	10.1093/pcp/pcv064	Singleton
Eucgr.I00181	RLK	Unknown	RLK_LRR-XII	TM_K_LRR	Chr09	gene	3779182	3782534	+	PF00560,PF00069,PF13855	GO:0005515,GO:0006468,GO:0005524,GO:0004672	Leucine-rich repeat receptor-like protein kinase family protein	Eucgr.I00181.1.p							Cluster 85
Eucgr.I00188	RLK	Unknown	RLK_LRR-XII	TM_K_LRR	Chr09	gene	3853791	3858321	+	PF00069,PF13855	GO:0006468,GO:0005524,GO:0004672,GO:0005515	Leucine-rich repeat receptor-like protein kinase family protein	Eucgr.I00188.1.p							Cluster 85
Eucgr.I00219	RLP	Unknown	RLP_LRR	TM_LRR	Chr09	gene	4556201	4559294	-	PF08263,PF00560,PF13855	GO:0005515	receptor like protein 53	Eucgr.I00219.1.p							Singleton
Eucgr.I00290	RLP	Unknown	RLP_LRR	TM_LRR	Chr09	gene	5635084	5637981	-	PF08263,PF13855	GO:0005515	receptor like protein 12	Eucgr.I00290.1.p	UP	Mangwanda	C. austroafricana	Susceptible	2015	10.1186/s12864-015-1529-x	Singleton
Eucgr.I00290	RLP	Unknown	RLP_LRR	TM_LRR	Chr09	gene	5635084	5637981	-	PF08263,PF13855	GO:0005515	receptor like protein 12	Eucgr.I00290.1.p	UP	Mangwanda	C. austroafricana	Resistent	2015	10.1186/s12864-015-1529-x	Singleton
Eucgr.I00290	RLP	Unknown	RLP_LRR	TM_LRR	Chr09	gene	5635084	5637981	-	PF08263,PF13855	GO:0005515	receptor like protein 12	Eucgr.I00290.1.p	DOWN	Xiaohui	R. solanacearum		2022	10.1007/s00438-022-01903-4	Singleton
Eucgr.I00302	RLP	Unknown	RLP_LRR	TM_LRR	Chr09	gene	5868365	5870242	+	PF00560,PF13855	GO:0005515	Leucine-rich receptor-like protein kinase family protein	Eucgr.I00302.1.p	UP	Santos	A. psidii	Susceptible	2020	10.1007/s11103-020-01030-x	Cluster 86
Eucgr.I00303	RLK	Unknown	RLK_LRR-X	TM_K_LRR	Chr09	gene	5884054	5887946	+	PF08263,PF00560,PF00069,PF13855	GO:0005515,GO:0006468,GO:0005524,GO:0004672	Leucine-rich receptor-like protein kinase family protein	Eucgr.I00303.1.p							Cluster 86
Eucgr.I00330	RLK	Unknown	RLK_LRR-III	TM_K_LRR	Chr09	gene	6247565	6254838	-	PF08263,PF00560,PF00069	GO:0005515,GO:0006468,GO:0005524,GO:0004672	Leucine-rich receptor-like protein kinase family protein	Eucgr.I00330.1.p							Singleton
Eucgr.I00356	RLP	Unknown	RLP_LRR	TM_LRR	Chr09	gene	6715788	6718613	-	PF08263,PF00560,PF13855	GO:0005515	disease resistance family protein / LRR family protein	Eucgr.I00356.1.p							Cluster 87
Eucgr.I00366	RLP	Unknown	RLP_LRR	TM_LRR	Chr09	gene	6865866	6868372	-	PF00560,PF13855	GO:0005515	disease resistance family protein / LRR family protein	Eucgr.I00366.1.p							Cluster 87
Eucgr.I00370	RLP	Unknown	RLP_LRR	TM_LRR	Chr09	gene	6981972	6985115	-	PF00560,PF13855	GO:0005515	disease resistance family protein / LRR family protein	Eucgr.I00370.1.p							Cluster 87
Eucgr.I00390	RLK	Unknown	RLK_LRR-I	TM_K_LRR_MalecLike	Chr09	gene	7525149	7533327	+	PF13855,PF07714,PF12819	GO:0005515,GO:0006468,GO:0004672	Leucine-rich repeat transmembrane protein kinase protein	Eucgr.I00390.1.p							Singleton
Eucgr.I00453	RLK	Unknown	RLK_LRR-I	TM_K_LRR_MalecLike	Chr09	gene	9204075	9211988	+	PF13855,PF00069,PF12819	GO:0005515,GO:0006468,GO:0005524,GO:0004672	Leucine-rich repeat protein kinase family protein	Eucgr.I00453.1.p	DOWN	Oates	L. invasa	Resistent	2015	10.1093/pcp/pcv064	Singleton
Eucgr.I00469	RLP	Unknown	RLP_LRR	TM_LRR	Chr09	gene	9552903	9553865	+	PF00560	GO:0005515	receptor like protein 7	Eucgr.I00469.1.p	UP	Xiaohui	R. solanacearum		2022	10.1007/s00438-022-01903-4	Cluster 88
Eucgr.I00470	RLK	Unknown	RLK_LRR-XII	TM_K_LRR	Chr09	gene	9593620	9596739	-	PF08263,PF00069	GO:0006468,GO:0005524,GO:0004672	Leucine-rich repeat protein kinase family protein	Eucgr.I00470.1.p	DOWN	Mangwanda	C. austroafricana	Resistent	2015	10.1186/s12864-015-1529-x	Cluster 88
Eucgr.I00477	RLK	Unknown	RLK_LRR-XI	TM_LRR	Chr09	gene	9676048	9678556	-	PF08263,PF00069,PF13855	GO:0006468,GO:0005524,GO:0004672,GO:0005515	Leucine-rich repeat protein kinase family protein	Eucgr.I00477.1.p	DOWN	Mangwanda	C. austroafricana	Resistent	2015	10.1186/s12864-015-1529-x	Cluster 88
Eucgr.I00479	RLK	Unknown	RLK_LRR-XII	TM_K_LRR	Chr09	gene	9700604	9704209	-	PF08263,PF13855,PF07714	GO:0005515,GO:0006468,GO:0004672	Leucine-rich repeat protein kinase family protein	Eucgr.I00479.1.p	DOWN	Mangwanda	C. austroafricana	Resistent	2015	10.1186/s12864-015-1529-x	Cluster 88
Eucgr.I00547	RLK	Unknown	RLK_LRR-XII	TM_K_LRR	Chr09	gene	11086424	11089401	-	PF00560,PF08263,PF13855,PF00069	GO:0005515,GO:0006468,GO:0005524,GO:0004672	Leucine-rich repeat protein kinase family protein	Eucgr.I00547.1.p	DOWN	Mangwanda	C. austroafricana	Resistent	2015	10.1186/s12864-015-1529-x	Singleton
Eucgr.I00635	RLK	Unknown	RLK_LRR-XI	TM_K_LRR	Chr09	gene	13263034	13267084	+	PF08263,PF13855,PF00069	GO:0005515,GO:0006468,GO:0005524,GO:0004672	Leucine-rich receptor-like protein kinase family protein	Eucgr.I00635.1.p	UP	Xiaohui	R. solanacearum		2022	10.1007/s00438-022-01903-4	Singleton
Eucgr.I00635	RLK	Unknown	RLK_LRR-XI	TM_K_LRR	Chr09	gene	13263034	13267084	+	PF08263,PF13855,PF00069	GO:0005515,GO:0006468,GO:0005524,GO:0004672	Leucine-rich receptor-like protein kinase family protein	Eucgr.I00635.1.p	DOWN	Xiaohui	R. solanacearum		2022	10.1007/s00438-022-01903-4	Singleton
Eucgr.I00656	RLK	Unknown	RLK_LRR-XII	TM_K_LRR	Chr09	gene	13607921	13610024	+	PF13855,PF00069	GO:0005515,GO:0006468,GO:0005524,GO:0004672	Leucine-rich repeat receptor-like protein kinase family protein	Eucgr.I00656.1.p	DOWN	Mangwanda	C. austroafricana	Resistent	2015	10.1186/s12864-015-1529-x	Singleton
Eucgr.I00656	RLK	Unknown	RLK_LRR-XII	TM_K_LRR	Chr09	gene	13607921	13610024	+	PF13855,PF00069	GO:0005515,GO:0006468,GO:0005524,GO:0004672	Leucine-rich repeat receptor-like protein kinase family protein	Eucgr.I00656.1.p	DOWN	Oates	L. invasa	Resistent	2015	10.1093/pcp/pcv064	Singleton
Eucgr.I00656	RLK	Unknown	RLK_LRR-XII	TM_K_LRR	Chr09	gene	13607921	13610024	+	PF13855,PF00069	GO:0005515,GO:0006468,GO:0005524,GO:0004672	Leucine-rich repeat receptor-like protein kinase family protein	Eucgr.I00656.1.p	UP	Santos	A. psidii	Susceptible	2020	10.1007/s11103-020-01030-x	Singleton
Eucgr.I00670	RLP	Unknown	RLP_LRR	TM_LRR	Chr09	gene	14037010	14038480	-			receptor like protein 44	Eucgr.I00670.1.p							Singleton
Eucgr.I00762	RLK	Unknown	RLK_LRR-III	TM_K_LRR	Chr09	gene	15788783	15791900	+	PF08263,PF13855,PF07714	GO:0005515,GO:0006468,GO:0004672	Leucine-rich repeat protein kinase family protein	Eucgr.I00762.1.p	UP	Xiaohui	R. solanacearum		2022	10.1007/s00438-022-01903-4	Singleton
Eucgr.I00944	RLK	Unknown	RLK_LRR-XII	TM_K_LRR	Chr09	gene	19407139	19411075	+	PF08263,PF13855,PF00069	GO:0005515,GO:0006468,GO:0005524,GO:0004672	Leucine-rich repeat receptor-like protein kinase family protein	Eucgr.I00944.1.p							Cluster 89
Eucgr.I00946	RLK	Unknown	RLK_LRR-XII	TM_K_LRR	Chr09	gene	19532932	19536577	+	PF08263,PF00560,PF13855,PF00069	GO:0005515,GO:0006468,GO:0005524,GO:0004672	Leucine-rich repeat receptor-like protein kinase family protein	Eucgr.I00946.1.p							Cluster 89
Eucgr.I01272	RLK	Unknown	RLK_LRR-XIV	TM_K_LRR	Chr09	gene	23430702	23436974	-	PF00560,PF07714,PF13855	GO:0005515,GO:0006468,GO:0004672	Leucine-rich repeat protein kinase family protein	Eucgr.I01272.1.p							Singleton
Eucgr.I01591	RLK	Unknown	RLK_LRR-XII	TM_K_LRR	Chr09	gene	25849547	25853433	+	PF08263,PF00560,PF00069,PF13855	GO:0005515,GO:0006468,GO:0005524,GO:0004672	Leucine-rich repeat protein kinase family protein	Eucgr.I01591.1.p							Cluster 90
Eucgr.I01593	RLK	Unknown	RLK_LRR-XV	TM_K_LRR	Chr09	gene	25870230	25874696	+	PF00560,PF08263,PF13855,PF00069	GO:0005515,GO:0006468,GO:0005524,GO:0004672	receptor-like protein kinase 2	Eucgr.I01593.1.p							Cluster 90
Eucgr.I01661	RLK	Unknown	RLK_LRR-VI	TM_K_LRR	Chr09	gene	26395869	26401066	-	PF13855,PF07714	GO:0005515,GO:0006468,GO:0004672	Leucine-rich repeat protein kinase family protein	Eucgr.I01661.1.p							Cluster 91
Eucgr.I01762	RLP	Unknown	RLP_LRR	TM_LRR	Chr09	gene	27536075	27538285	-	PF08263,PF00560,PF13855	GO:0005515	receptor like protein 43	Eucgr.I01762.1.p							Singleton
Eucgr.I01922	RLK	Unknown	RLK_LRR-XII	TM_K_LRR	Chr09	gene	29170580	29173493	-	PF00560,PF13855,PF00069	GO:0005515,GO:0006468,GO:0005524,GO:0004672	Leucine-rich repeat receptor-like protein kinase family protein	Eucgr.I01922.1.p	UP	Xiaohui	R. solanacearum		2022	10.1007/s00438-022-01903-4	Cluster 92
Eucgr.I01922	RLK	Unknown	RLK_LRR-XII	TM_K_LRR	Chr09	gene	29170580	29173493	-	PF00560,PF13855,PF00069	GO:0005515,GO:0006468,GO:0005524,GO:0004672	Leucine-rich repeat receptor-like protein kinase family protein	Eucgr.I01922.1.p	DOWN	Xiaohui	R. solanacearum		2022	10.1007/s00438-022-01903-4	Cluster 92
Eucgr.I01928	RLK	Unknown	RLP_LRR	TM_LRR	Chr09	gene	29228619	29230948	+	PF00560,PF13855	GO:0005515	Leucine-rich repeat receptor-like protein kinase family protein	Eucgr.I01928.1.p							Cluster 92
Eucgr.I01957	RLK	Unknown	RLK_LRR-XII	TM_K_LRR	Chr09	gene	29498249	29500820	-	PF00560,PF13855,PF00069	GO:0005515,GO:0006468,GO:0005524,GO:0004672	Leucine-rich repeat receptor-like protein kinase family protein	Eucgr.I01957.1.p	DOWN	Xiaohui	R. solanacearum		2022	10.1007/s00438-022-01903-4	Singleton
Eucgr.I02037	RLK	Unknown	RLK_LRR-XV	TM_K_LRR	Chr09	gene	29916305	29920446	+	PF08263,PF00560,PF13855,PF00069	GO:0005515,GO:0006468,GO:0005524,GO:0004672	receptor-like protein kinase 2	Eucgr.I02037.1.p							Singleton
Eucgr.I02173	RLK	Unknown	RLK_LRR-X	TM_K_LRR	Chr09	gene	31607381	31610293	-	PF00560,PF13855,PF00069	GO:0005515,GO:0006468,GO:0005524,GO:0004672	Leucine-rich receptor-like protein kinase family protein	Eucgr.I02173.1.p							Singleton
Eucgr.I02248	RLK	Unknown	RLK_LRR-XII	TM_K_LRR	Chr09	gene	26586359	26593144	-	PF13855,PF00069	GO:0005515,GO:0006468,GO:0005524,GO:0004672	Leucine-rich repeat receptor-like protein kinase family protein	Eucgr.I02248.1.p							Cluster 91
Eucgr.I02250	RLK	Unknown	RLK_LRR-XII	TM_K_LRR	Chr09	gene	26669316	26672144	-	PF00560,PF13855,PF00069	GO:0005515,GO:0006468,GO:0005524,GO:0004672	Leucine-rich repeat receptor-like protein kinase family protein	Eucgr.I02250.1.p							Cluster 91
Eucgr.I02251	RLK	Unknown	RLK_LRR-XII	TM_K_LRR	Chr09	gene	26678099	26681357	-	PF13855,PF00069	GO:0005515,GO:0006468,GO:0005524,GO:0004672	Leucine-rich repeat receptor-like protein kinase family protein	Eucgr.I02251.1.p							Cluster 91
Eucgr.I02256	RLK	Unknown	RLP_LRR	TM	Chr09	gene	26779066	26780616	+	PF00069,PF00560	GO:0006468,GO:0005524,GO:0004672,GO:0005515	Leucine-rich repeat receptor-like protein kinase family protein	Eucgr.I02256.1.p							Cluster 91
Eucgr.I02367	RLK	Unknown	RLK_LRR-X	TM_K_LRR	Chr09	gene	33991182	33995351	-	PF08263,PF00560,PF00069,PF13855	GO:0005515,GO:0006468,GO:0005524,GO:0004672	Leucine-rich receptor-like protein kinase family protein	Eucgr.I02367.1.p							Singleton
Eucgr.I02635	RLP	Unknown	RLP_LRR	TM_LRR	Chr09	gene	37498471	37500567	-	PF00560,PF13855	GO:0005515	phytosulfokin receptor 1	Eucgr.I02635.1.p							Singleton
Eucgr.I02665	RLK	Unknown	RLK_LRR-XII	TM_K_LRR	Chr09	gene	37722579	37726969	+	PF13855,PF00069	GO:0005515,GO:0006468,GO:0005524,GO:0004672	Leucine-rich repeat receptor-like protein kinase family protein	Eucgr.I02665.1.p	UP	Santos	A. psidii	Susceptible	2020	10.1007/s11103-020-01030-x	Cluster 93
Eucgr.I02690	RLK	Unknown	RLK_LRR-II	TM_K_LRR	Chr09	gene	37910187	37919449	-	PF00560,PF08263,PF00069	GO:0005515,GO:0006468,GO:0005524,GO:0004672	BRI1-associated receptor kinase	Eucgr.I02690.1.p							Cluster 93
Eucgr.I02765	RLK	Unknown	RLK_LRR-XI	TM_K	Chr09	gene	38521681	38525890	-	PF07714	GO:0006468,GO:0004672	Leucine-rich receptor-like protein kinase family protein	Eucgr.I02765.1.p							Singleton
Eucgr.J00100	RLK	Unknown	RLK_LRR-III	TM_K_LRR	Chr10	gene	1320915	1325598	+	PF00560,PF08263,PF13855,PF07714	GO:0005515,GO:0006468,GO:0004672	Leucine-rich repeat protein kinase family protein	Eucgr.J00100.1.p	DOWN	Mangwanda	C. austroafricana	Resistent	2015	10.1186/s12864-015-1529-x	Singleton
Eucgr.J00100	RLK	Unknown	RLK_LRR-III	TM_K_LRR	Chr10	gene	1320915	1325598	+	PF00560,PF08263,PF13855,PF07714	GO:0005515,GO:0006468,GO:0004672	Leucine-rich repeat protein kinase family protein	Eucgr.J00100.1.p	DOWN	Xiaohui	R. solanacearum		2022	10.1007/s00438-022-01903-4	Singleton
Eucgr.J00480	RLP	Unknown	RLP_LRR	TM	Chr10	gene	5185762	5188458	+	PF00560	GO:0005515	EF-TU receptor	Eucgr.J00480.1.p							Singleton
Eucgr.J00559	RLK	Unknown	RLK_LRR-IX	TM_K	Chr10	gene	6162324	6165821	-	PF08263,PF07714	GO:0006468,GO:0004672	Leucine-rich repeat protein kinase family protein	Eucgr.J00559.1.p	DOWN	Xiaohui	R. solanacearum		2022	10.1007/s00438-022-01903-4	Singleton
Eucgr.J00559	RLK	Unknown	RLK_LRR-IX	TM_K	Chr10	gene	6162324	6165821	-	PF08263,PF07714	GO:0006468,GO:0004672	Leucine-rich repeat protein kinase family protein	Eucgr.J00559.1.p	UP	Xiaohui	R. solanacearum		2022	10.1007/s00438-022-01903-4	Singleton
Eucgr.J00629	RLK	Unknown	RLK_LRR-III	TM_K_LRR	Chr10	gene	6944919	6949841	-	PF08263,PF13855,PF07714	GO:0005515,GO:0006468,GO:0004672	Leucine-rich repeat protein kinase family protein	Eucgr.J00629.1.p	UP	Xiaohui	R. solanacearum		2022	10.1007/s00438-022-01903-4	Cluster 95
Eucgr.J00633	RLP	Unknown	RLP_LRR	TM_LRR	Chr10	gene	6976476	6981184	-	PF00560,PF13855,PF08263	GO:0005515	Leucine-rich repeat (LRR) family protein	Eucgr.J00633.1.p							Cluster 95
Eucgr.J00633	RLP	Unknown	RLP_LRR	TM_LRR	Chr10	gene	6976476	6981184	-	PF13855,PF08263	GO:0005515	Leucine-rich repeat (LRR) family protein	Eucgr.J00633.1.p							Cluster 95
Eucgr.J01421	RLK	Unknown	RLK_LRR-I	TM_K_LRR_MalecLike	Chr10	gene	16964709	16969806	-	PF13855,PF07714,PF12819	GO:0005515,GO:0006468,GO:0004672	Leucine-rich repeat transmembrane protein kinase protein	Eucgr.J01421.1.p							Singleton
Eucgr.J01441	RLK	Unknown	RLK_LRR-II	TM_K_LRR	Chr10	gene	17255392	17259981	-	PF13855,PF08263,PF00069	GO:0005515,GO:0006468,GO:0005524,GO:0004672	NSP-interacting kinase 1	Eucgr.J01441.2.p							Singleton
Eucgr.J01604	RLK	Unknown	RLK_LRR-III	TM_K_LRR	Chr10	gene	20182499	20185989	-	PF08263,PF07714	GO:0006468,GO:0004672	Leucine-rich repeat protein kinase family protein	Eucgr.J01604.1.p							Singleton
Eucgr.J01624	RLK	Unknown	RLK_LRR-IX	TM_K_LRR	Chr10	gene	20388907	20392266	-	PF08263,PF00069	GO:0006468,GO:0005524,GO:0004672	transmembrane kinase 1	Eucgr.J01624.1.p	UP	Xiaohui	R. solanacearum		2022	10.1007/s00438-022-01903-4	Singleton
Eucgr.J01624	RLK	Unknown	RLK_LRR-IX	TM_K_LRR	Chr10	gene	20388907	20392266	-	PF08263,PF00069	GO:0006468,GO:0005524,GO:0004672	transmembrane kinase 1	Eucgr.J01624.1.p	DOWN	Xiaohui	R. solanacearum		2022	10.1007/s00438-022-01903-4	Singleton
Eucgr.J01701	RLK	Unknown	RLK_LRR-XII	TM_K_LRR	Chr10	gene	21354456	21358488	-	PF08263,PF00560,PF00069,PF13855	GO:0005515,GO:0006468,GO:0005524,GO:0004672	Leucine-rich repeat receptor-like protein kinase family protein	Eucgr.J01701.1.p	DOWN	Santos	A. psidii	Susceptible	2020	10.1007/s11103-020-01030-x	Singleton
Eucgr.J01701	RLK	Unknown	RLK_LRR-XII	TM_K_LRR	Chr10	gene	21354456	21358488	-	PF08263,PF00560,PF00069,PF13855	GO:0005515,GO:0006468,GO:0005524,GO:0004672	Leucine-rich repeat receptor-like protein kinase family protein	Eucgr.J01701.1.p	DOWN	Oates	L. invasa	Susceptible	2015	10.1093/pcp/pcv064	Singleton
Eucgr.J01715	RLK	Unknown	RLK_LRR-I	TM_K_LRR_MalecLike	Chr10	gene	21618756	21624339	+	PF13855,PF07714,PF12819	GO:0005515,GO:0006468,GO:0004672	Leucine-rich repeat transmembrane protein kinase protein	Eucgr.J01715.1.p							Singleton
Eucgr.J01778	RLK	Unknown	RLK_LRR-X	TM_K_LRR	Chr10	gene	22988426	22991443	-	PF08263,PF00560,PF13855,PF00069	GO:0005515,GO:0006468,GO:0005524,GO:0004672	phytosulfokin receptor 1	Eucgr.J01778.1.p							Cluster 96
Eucgr.J01787	RLP	Unknown	RLP_LRR	TM_LRR	Chr10	gene	23113388	23115456	-	PF00560,PF13855	GO:0005515	phytosulfokin receptor 1	Eucgr.J01787.1.p	UP	Xiaohui	R. solanacearum		2022	10.1007/s00438-022-01903-4	Cluster 96
Eucgr.J01806	RLK	Unknown	RLK_LRR-XII	TM_K_LRR	Chr10	gene	23288687	23291967	-	PF00560,PF13855,PF00069	GO:0005515,GO:0006468,GO:0005524,GO:0004672	Leucine-rich repeat protein kinase family protein	Eucgr.J01806.1.p	DOWN	Xiaohui	R. solanacearum		2022	10.1007/s00438-022-01903-4	Cluster 96
Eucgr.J01806	RLK	Unknown	RLK_LRR-XII	TM_K_LRR	Chr10	gene	23288687	23291967	-	PF00560,PF13855,PF00069	GO:0005515,GO:0006468,GO:0005524,GO:0004672	Leucine-rich repeat protein kinase family protein	Eucgr.J01806.1.p	UP	Xiaohui	R. solanacearum		2022	10.1007/s00438-022-01903-4	Cluster 96
Eucgr.J01835	RLK	Unknown	RLK_LRR-III	TM_K_LRR	Chr10	gene	23631901	23636922	+	PF08263,PF13855,PF00069	GO:0005515,GO:0006468,GO:0005524,GO:0004672	Leucine-rich repeat protein kinase family protein	Eucgr.J01835.1.p	DOWN	Xiaohui	R. solanacearum		2022	10.1007/s00438-022-01903-4	Cluster 97
Eucgr.J01835	RLK	Unknown	RLK_LRR-III	TM_K_LRR	Chr10	gene	23631901	23636922	+	PF08263,PF13855,PF00069	GO:0005515,GO:0006468,GO:0005524,GO:0004672	Leucine-rich repeat protein kinase family protein	Eucgr.J01835.1.p	UP	Xiaohui	R. solanacearum		2022	10.1007/s00438-022-01903-4	Cluster 97
Eucgr.J01846	RLK	Unknown	RLK_LRR-VIII	TM_K_LRR	Chr10	gene	23753193	23767105	+	PF08263,PF13855,PF00069	GO:0005515,GO:0006468,GO:0005524,GO:0004672	Leucine-rich repeat protein kinase family protein	Eucgr.J01846.1.p							Cluster 97
Eucgr.J01920	RLK	Unknown	RLK_LRR-XII	TM_K	Chr10	gene	24589849	24592960	+	PF08263,PF00560,PF07714	GO:0005515,GO:0006468,GO:0004672	Leucine-rich repeat protein kinase family protein	Eucgr.J01920.1.p							Cluster 98
Eucgr.J01921	RLK	Unknown	RLK_LRR-XII	TM_LRR	Chr10	gene	24601737	24604949	+	PF08263,PF00069,PF00560,PF13855	GO:0006468,GO:0005524,GO:0004672,GO:0005515	Leucine-rich repeat protein kinase family protein	Eucgr.J01921.1.p							Cluster 98
Eucgr.J01925	RLK	Unknown	RLK_LRR-XII	TM_K_LRR	Chr10	gene	24644066	24647185	-	PF00560,PF08263,PF13855,PF00069	GO:0005515,GO:0006468,GO:0005524,GO:0004672	Leucine-rich repeat protein kinase family protein	Eucgr.J01925.1.p							Cluster 98
Eucgr.J02155	RLK	Unknown	RLK_LRR-X	TM_K_LRR	Chr10	gene	26782469	26784538	-	PF00560,PF08263,PF07714	GO:0005515,GO:0006468,GO:0004672	Leucine-rich repeat protein kinase family protein	Eucgr.J02155.1.p	DOWN	Xiaohui	R. solanacearum		2022	10.1007/s00438-022-01903-4	Singleton
Eucgr.J02155	RLK	Unknown	RLK_LRR-X	TM_K_LRR	Chr10	gene	26782469	26784538	-	PF00560,PF08263,PF07714	GO:0005515,GO:0006468,GO:0004672	Leucine-rich repeat protein kinase family protein	Eucgr.J02155.1.p	UP	Xiaohui	R. solanacearum		2022	10.1007/s00438-022-01903-4	Singleton
Eucgr.J02326	RLP	Unknown	RLP_LRR	TM_LRR	Chr10	gene	28444068	28447040	+	PF00560,PF13855	GO:0005515	disease resistance family protein / LRR family protein	Eucgr.J02326.1.p							Cluster 99
Eucgr.J02327	RLP	Unknown	RLP_LRR	TM_LRR	Chr10	gene	28456337	28458943	+	PF00560,PF13855	GO:0005515	disease resistance family protein / LRR family protein	Eucgr.J02327.1.p							Cluster 99
Eucgr.J02330	RLP	Unknown	RLP_LRR	TM_LRR	Chr10	gene	28486943	28489801	+	PF08263,PF00560,PF13855	GO:0005515	disease resistance family protein / LRR family protein	Eucgr.J02330.1.p	DOWN	Oates	L. invasa	Resistent	2015	10.1093/pcp/pcv064	Cluster 99
Eucgr.J02330	RLP	Unknown	RLP_LRR	TM_LRR	Chr10	gene	28486943	28489801	+	PF08263,PF00560,PF13855	GO:0005515	disease resistance family protein / LRR family protein	Eucgr.J02330.1.p	UP	Santos	A. psidii	Susceptible	2020	10.1007/s11103-020-01030-x	Cluster 99
Eucgr.J02582	RLK	Unknown	RLK_LRR-V	TM_K_LRR	Chr10	gene	30896183	30902863	+	PF00560,PF08263,PF07714	GO:0005515,GO:0006468,GO:0004672	STRUBBELIG-receptor family 6	Eucgr.J02582.1.p	UP	Xiaohui	R. solanacearum		2022	10.1007/s00438-022-01903-4	Singleton
Eucgr.J02582	RLK	Unknown	RLK_LRR-V	TM_K_LRR	Chr10	gene	30896183	30902863	+	PF00560,PF08263,PF07714	GO:0005515,GO:0006468,GO:0004672	STRUBBELIG-receptor family 6	Eucgr.J02582.1.p	DOWN	Xiaohui	R. solanacearum		2022	10.1007/s00438-022-01903-4	Singleton
Eucgr.J02684	RLK	Unknown	RLK_LRR-I	TM_K_LRR	Chr08	gene	14500674	14505334	-	PF13855,PF07714	GO:0005515,GO:0006468,GO:0004672	Leucine-rich repeat transmembrane protein kinase protein	Eucgr.J02684.1.p							Cluster 80
Eucgr.J02691	RLK	Unknown	RLK_LRR-I	TM_K_LRR_MalecLike	Chr08	gene	14383053	14388546	-	PF13855,PF07714,PF12819	GO:0005515,GO:0006468,GO:0004672	Leucine-rich repeat transmembrane protein kinase protein	Eucgr.J02691.1.p	UP	Santos	A. psidii	Susceptible	2020	10.1007/s11103-020-01030-x	Cluster 80
Eucgr.J02691	RLK	Unknown	RLK_LRR-I	TM_K_LRR_MalecLike	Chr08	gene	14383053	14388546	-	PF13855,PF07714,PF12819	GO:0005515,GO:0006468,GO:0004672	Leucine-rich repeat transmembrane protein kinase protein	Eucgr.J02691.1.p	DOWN	Xiaohui	R. solanacearum		2022	10.1007/s00438-022-01903-4	Cluster 80
Eucgr.J02698	RLK	Unknown	RLK_LRR-I	TM_K_LRR_MalecLike	Chr10	gene	31894301	31901975	-	PF13855,PF07714,PF12819	GO:0005515,GO:0006468,GO:0004672	Leucine-rich repeat transmembrane protein kinase protein	Eucgr.J02698.1.p	DOWN	Oates	L. invasa	Resistent	2015	10.1093/pcp/pcv064	Singleton
Eucgr.J02698	RLK	Unknown	RLK_LRR-I	TM_K_LRR_MalecLike	Chr10	gene	31894301	31901975	-	PF13855,PF07714,PF12819	GO:0005515,GO:0006468,GO:0004672	Leucine-rich repeat transmembrane protein kinase protein	Eucgr.J02698.1.p	DOWN	Oates	L. invasa	Susceptible	2015	10.1093/pcp/pcv064	Singleton
Eucgr.J02704	RLK	Unknown	RLK_LRR-I	TM_K_LRR_MalecLike	Chr10	gene	32333839	32342276	-	PF00560,PF07714,PF12819	GO:0005515,GO:0006468,GO:0004672	Leucine-rich repeat transmembrane protein kinase protein	Eucgr.J02704.1.p	DOWN	Oates	L. invasa	Resistent	2015	10.1093/pcp/pcv064	Singleton
Eucgr.J02704	RLK	Unknown	RLK_LRR-I	TM_K_LRR_MalecLike	Chr10	gene	32333839	32342276	-	PF13855,PF07714,PF12819	GO:0005515,GO:0006468,GO:0004672	Leucine-rich repeat transmembrane protein kinase protein	Eucgr.J02704.1.p	DOWN	Oates	L. invasa	Resistent	2015	10.1093/pcp/pcv064	Singleton
Eucgr.J02800	RLK	Unknown	RLK_LRR-III	TM_K_LRR	Chr10	gene	33468741	33470901	+	PF08263,PF13855,PF07714	GO:0005515,GO:0006468,GO:0004672	Leucine-rich repeat protein kinase family protein	Eucgr.J02800.1.p	UP	Santos	A. psidii	Susceptible	2020	10.1007/s11103-020-01030-x	Cluster 100
Eucgr.J02812	RLK	Unknown	RLK_LRR-XII	TM_K_LRR	Chr10	gene	33553053	33556197	-	PF00560,PF08263,PF00069	GO:0005515,GO:0006468,GO:0005524,GO:0004672	Leucine-rich repeat protein kinase family protein	Eucgr.J02812.1.p	UP	Mangwanda	C. austroafricana	Resistent	2015	10.1186/s12864-015-1529-x	Cluster 100
Eucgr.J02812	RLK	Unknown	RLK_LRR-XII	TM_K_LRR	Chr10	gene	33553053	33556197	-	PF00560,PF08263,PF00069	GO:0005515,GO:0006468,GO:0005524,GO:0004672	Leucine-rich repeat protein kinase family protein	Eucgr.J02812.1.p	UP	Xiaohui	R. solanacearum		2022	10.1007/s00438-022-01903-4	Cluster 100
Eucgr.J02813	RLK	Unknown	RLK_LRR-XII	TM_K_LRR	Chr10	gene	33561558	33564739	-	PF00560,PF08263,PF00069	GO:0005515,GO:0006468,GO:0005524,GO:0004672	Leucine-rich repeat protein kinase family protein	Eucgr.J02813.1.p	UP	Xiaohui	R. solanacearum		2022	10.1007/s00438-022-01903-4	Cluster 100
Eucgr.J02814	RLK	Unknown	RLK_LRR-XII	TM_K_LRR	Chr10	gene	33574020	33577306	-	PF00560,PF08263,PF13855,PF00069	GO:0005515,GO:0006468,GO:0005524,GO:0004672	Leucine-rich repeat protein kinase family protein	Eucgr.J02814.1.p	UP	Mangwanda	C. austroafricana	Resistent	2015	10.1186/s12864-015-1529-x	Cluster 100
Eucgr.J02814	RLK	Unknown	RLK_LRR-XII	TM_K_LRR	Chr10	gene	33574020	33577306	-	PF00560,PF08263,PF13855,PF00069	GO:0005515,GO:0006468,GO:0005524,GO:0004672	Leucine-rich repeat protein kinase family protein	Eucgr.J02814.1.p	UP	Xiaohui	R. solanacearum		2022	10.1007/s00438-022-01903-4	Cluster 100
Eucgr.J02814	RLK	Unknown	RLK_LRR-XII	TM_K_LRR	Chr10	gene	33574020	33577306	-	PF00560,PF08263,PF13855,PF00069	GO:0005515,GO:0006468,GO:0005524,GO:0004672	Leucine-rich repeat protein kinase family protein	Eucgr.J02814.1.p	UP	Mangwanda	C. austroafricana	Susceptible	2015	10.1186/s12864-015-1529-x	Cluster 100
Eucgr.J02862	RLK	Unknown	RLK_LRR-I	TM_LRR_MalecLike	Chr10	gene	34012088	34019190	+	PF12799,PF07714,PF12819	GO:0006468,GO:0004672	Leucine-rich repeat transmembrane protein kinase protein	Eucgr.J02862.1.p	DOWN	Oates	L. invasa	Resistent	2015	10.1093/pcp/pcv064	Cluster 101
Eucgr.J02863	RLK	Unknown	RLK_LRR-I	TM_K_LRR_MalecLike	Chr10	gene	34021896	34030273	+	PF13855,PF07714,PF12819	GO:0005515,GO:0006468,GO:0004672	Leucine-rich repeat transmembrane protein kinase protein	Eucgr.J02863.1.p	DOWN	Oates	L. invasa	Resistent	2015	10.1093/pcp/pcv064	Cluster 101
Eucgr.J02863	RLK	Unknown	RLK_LRR-I	TM_K_LRR_MalecLike	Chr10	gene	34021896	34030273	+	PF00560,PF12819,PF07714	GO:0005515,GO:0006468,GO:0004672	Leucine-rich repeat transmembrane protein kinase protein	Eucgr.J02863.1.p	DOWN	Santos	A. psidii	Susceptible	2020	10.1007/s11103-020-01030-x	Cluster 101
Eucgr.J02863	RLK	Unknown	RLK_LRR-I	TM_K_LRR_MalecLike	Chr10	gene	34021896	34030273	+	PF00560,PF12819,PF07714	GO:0005515,GO:0006468,GO:0004672	Leucine-rich repeat transmembrane protein kinase protein	Eucgr.J02863.1.p	DOWN	Oates	L. invasa	Resistent	2015	10.1093/pcp/pcv064	Cluster 101
Eucgr.J02863	RLK	Unknown	RLK_LRR-I	TM_K_LRR_MalecLike	Chr10	gene	34021896	34030273	+	PF13855,PF07714,PF12819	GO:0005515,GO:0006468,GO:0004672	Leucine-rich repeat transmembrane protein kinase protein	Eucgr.J02863.1.p	DOWN	Santos	A. psidii	Susceptible	2020	10.1007/s11103-020-01030-x	Cluster 101
Eucgr.J02865	RLK	Unknown	RLK_LRR-I	TM_K_LRR_MalecLike	Chr10	gene	34156500	34164268	+	PF13855,PF07714,PF12819	GO:0005515,GO:0006468,GO:0004672	Leucine-rich repeat transmembrane protein kinase protein	Eucgr.J02865.1.p	UP	Santos	A. psidii	Susceptible	2020	10.1007/s11103-020-01030-x	Cluster 101
Eucgr.J02865	RLK	Unknown	RLK_LRR-I	TM_K_LRR_MalecLike	Chr10	gene	34156500	34164268	+	PF13855,PF07714,PF12819	GO:0005515,GO:0006468,GO:0004672	Leucine-rich repeat transmembrane protein kinase protein	Eucgr.J02865.1.p	DOWN	Oates	L. invasa	Resistent	2015	10.1093/pcp/pcv064	Cluster 101
Eucgr.J02898	RLK	Unknown	RLK_LRR-I	TM_LRR_MalecLike	Chr10	gene	34488290	34495007	+	PF00560,PF07714,PF12819	GO:0005515,GO:0006468,GO:0004672	Leucine-rich repeat transmembrane protein kinase protein	Eucgr.J02898.1.p	DOWN	Oates	L. invasa	Resistent	2015	10.1093/pcp/pcv064	Cluster 102
Eucgr.J02898	RLK	Unknown	RLK_LRR-I	TM_LRR_MalecLike	Chr10	gene	34488290	34495007	+	PF00560,PF07714,PF12819	GO:0005515,GO:0006468,GO:0004672	Leucine-rich repeat transmembrane protein kinase protein	Eucgr.J02898.1.p	UP	Xiaohui	R. solanacearum		2022	10.1007/s00438-022-01903-4	Cluster 102
Eucgr.J02902	RLK	Unknown	RLK_LRR-I	TM_K_LRR	Chr10	gene	34575431	34579269	+	PF00560,PF07714	GO:0005515,GO:0006468,GO:0004672	Leucine-rich repeat transmembrane protein kinase protein	Eucgr.J02902.1.p							Cluster 102
Eucgr.J02905	RLK	Unknown	RLK_LRR-I	TM_K_LRR_MalecLike	Chr10	gene	34616680	34624721	+	PF13855,PF07714,PF12819	GO:0005515,GO:0006468,GO:0004672	Leucine-rich repeat transmembrane protein kinase protein	Eucgr.J02905.1.p	UP	Santos	A. psidii	Susceptible	2020	10.1007/s11103-020-01030-x	Cluster 102
Eucgr.J02909	RLK	Unknown	RLK_LRR-I	TM_K_LRR_MalecLike	Chr10	gene	34748881	34755956	+	PF00560,PF07714,PF12819	GO:0005515,GO:0006468,GO:0004672	FLG22-induced receptor-like kinase 1	Eucgr.J02909.1.p	DOWN	Oates	L. invasa	Resistent	2015	10.1093/pcp/pcv064	Cluster 102
Eucgr.J02909	RLK	Unknown	RLK_LRR-I	TM_K_LRR_MalecLike	Chr10	gene	34748881	34755956	+	PF00560,PF07714,PF12819	GO:0005515,GO:0006468,GO:0004672	FLG22-induced receptor-like kinase 1	Eucgr.J02909.1.p	UP	Santos	A. psidii	Susceptible	2020	10.1007/s11103-020-01030-x	Cluster 102
Eucgr.J02909	RLK	Unknown	RLK_LRR-I	TM_K_LRR_MalecLike	Chr10	gene	34748881	34755956	+	PF00560,PF07714,PF12819	GO:0005515,GO:0006468,GO:0004672	FLG22-induced receptor-like kinase 1	Eucgr.J02909.1.p	DOWN	Xiaohui	R. solanacearum		2022	10.1007/s00438-022-01903-4	Cluster 102
Eucgr.J02912	RLK	Unknown	RLK_LRR-I	TM_K_LRR_MalecLike	Chr10	gene	34798177	34803653	+	PF13855,PF07714,PF12819	GO:0005515,GO:0006468,GO:0004672	Leucine-rich repeat transmembrane protein kinase protein	Eucgr.J02912.1.p							Cluster 102
Eucgr.J02920	RLK	Unknown	RLK_LRR-I	TM_K_LRR_MalecLike	Chr10	gene	34875556	34883259	+	PF00069,PF12819	GO:0006468,GO:0005524,GO:0004672	Leucine-rich repeat transmembrane protein kinase protein	Eucgr.J02920.1.p							Cluster 102
Eucgr.J02925	RLK	Unknown	RLK_LRR-I	TM_K_LRR_MalecLike	Chr10	gene	34965508	34970335	+	PF13855,PF07714,PF12819	GO:0005515,GO:0006468,GO:0004672	Leucine-rich repeat transmembrane protein kinase protein	Eucgr.J02925.1.p	UP	Santos	A. psidii	Susceptible	2020	10.1007/s11103-020-01030-x	Cluster 102
Eucgr.J03001	RLP	Unknown	RLP_LRR	TM_LRR	Chr10	gene	35609770	35612595	-	PF08263,PF00560,PF13855	GO:0005515	receptor like protein 6	Eucgr.J03001.1.p							Cluster 103
Eucgr.J03004	RLP	Unknown	RLP_LRR	TM_LRR	Chr10	gene	35644859	35647771	-	PF08263,PF00560	GO:0005515	receptor like protein 6	Eucgr.J03004.1.p							Cluster 103
Eucgr.J03194	RLK	Unknown	RLK_LRR-V	TM_K_LRR	Chr10	gene	37623615	37630969	-	PF08263,PF13855,PF07714	GO:0005515,GO:0006468,GO:0004672	STRUBBELIG-receptor family 5	Eucgr.J03194.1.p							Singleton
Eucgr.K00002	RLK	Unknown	RLK_LRR-XII	TM_K_LRR	Chr11	gene	46841	49973	+	PF08263,PF00560,PF00069	GO:0005515,GO:0006468,GO:0005524,GO:0004672	Leucine-rich repeat protein kinase family protein	Eucgr.K00002.1.p							Cluster 104
Eucgr.K00004	RLK	Unknown	RLK_LRR-XII	TM_K_LRR	Chr11	gene	55048	57408	+	PF00560,PF13855,PF07714	GO:0005515,GO:0006468,GO:0004672	Leucine-rich repeat protein kinase family protein	Eucgr.K00004.1.p							Cluster 104
Eucgr.K00063	RLP	Unknown	RLP_LRR	TM_LRR	Chr11	gene	305586	309365	+	PF08263,PF00560,PF13855	GO:0005515	receptor like protein 43	Eucgr.K00063.1.p	DOWN	Xiaohui	R. solanacearum		2022	10.1007/s00438-022-01903-4	Singleton
Eucgr.K00138	RLK	Unknown	RLK_LRR-XIII	TM_K_LRR	Chr11	gene	874391	879975	+	PF08263,PF00560,PF13855,PF00069	GO:0005515,GO:0006468,GO:0005524,GO:0004672	ERECTA-like 1	Eucgr.K00138.1.p							Singleton
Eucgr.K00167	RLK	Unknown	RLK_LRR-XI	TM_K_LRR	Chr11	gene	1089210	1093286	-	PF08263,PF00560,PF13855,PF00069	GO:0005515,GO:0006468,GO:0005524,GO:0004672	Leucine-rich repeat protein kinase family protein	Eucgr.K00167.1.p							Singleton
Eucgr.K00256	RLP	Unknown	RLP_LRR	TM_LRR	Chr11	gene	2152957	2157224	-	PF08263,PF00560,PF13855	GO:0005515	disease resistance family protein / LRR family protein	Eucgr.K00256.1.p							Cluster 105
Eucgr.K00259	RLP	Unknown	RLP_LRR	TM_LRR	Chr11	gene	2179727	2183412	-	PF08263,PF00560,PF13855	GO:0005515	disease resistance family protein / LRR family protein	Eucgr.K00259.1.p	DOWN	Xiaohui	R. solanacearum		2022	10.1007/s00438-022-01903-4	Cluster 105
Eucgr.K00259	RLP	Unknown	RLP_LRR	TM_LRR	Chr11	gene	2179727	2183412	-	PF08263,PF00560,PF13855	GO:0005515	disease resistance family protein / LRR family protein	Eucgr.K00259.1.p	DOWN	Oates	L. invasa	Resistent	2015	10.1093/pcp/pcv064	Cluster 105
Eucgr.K00261	RLP	Unknown	RLP_LRR	TM_LRR	Chr11	gene	2213183	2216848	-	PF08263,PF00560,PF13855	GO:0005515	disease resistance family protein / LRR family protein	Eucgr.K00261.1.p	DOWN	Mangwanda	C. austroafricana	Susceptible	2015	10.1186/s12864-015-1529-x	Cluster 105
Eucgr.K00261	RLP	Unknown	RLP_LRR	TM_LRR	Chr11	gene	2213183	2216848	-	PF08263,PF00560,PF13855	GO:0005515	disease resistance family protein / LRR family protein	Eucgr.K00261.1.p	UP	Santos	A. psidii	Susceptible	2020	10.1007/s11103-020-01030-x	Cluster 105
Eucgr.K00261	RLP	Unknown	RLP_LRR	TM_LRR	Chr11	gene	2213183	2216848	-	PF08263,PF00560,PF13855	GO:0005515	disease resistance family protein / LRR family protein	Eucgr.K00261.1.p	DOWN	Mangwanda	C. austroafricana	Resistent	2015	10.1186/s12864-015-1529-x	Cluster 105
Eucgr.K00318	CLK	Unknown	RLK_LRR-III	TM_K_LRR	Chr11	gene	2800698	2803767	+	PF00560,PF08263,PF13855,PF00069	GO:0005515,GO:0006468,GO:0005524,GO:0004672	Leucine-rich repeat protein kinase family protein	Eucgr.K00318.1.p							Singleton
Eucgr.K00318	CLK	Unknown	RLK_LRR-III	TM_K_LRR	Chr11	gene	2800698	2803767	+	PF00560,PF00069,PF08263,PF13855	GO:0005515,GO:0006468,GO:0005524,GO:0004672	Leucine-rich repeat protein kinase family protein	Eucgr.K00318.1.p							Singleton
Eucgr.K00624	RLP	Unknown	RLP_LRR	TM_LRR	Chr11	gene	6959562	6962752	+	PF00560,PF13855	GO:0005515	receptor like protein 19	Eucgr.K00624.1.p	DOWN	Oates	L. invasa	Resistent	2015	10.1093/pcp/pcv064	Cluster 106
Eucgr.K00629	RLP	Unknown	RLP_LRR	TM_LRR	Chr11	gene	7015608	7018598	+	PF08263,PF00560,PF13855	GO:0005515	receptor like protein 6	Eucgr.K00629.1.p	DOWN	Oates	L. invasa	Resistent	2015	10.1093/pcp/pcv064	Cluster 106
Eucgr.K00629	RLP	Unknown	RLP_LRR	TM_LRR	Chr11	gene	7015608	7018598	+	PF08263,PF00560,PF13855	GO:0005515	receptor like protein 6	Eucgr.K00629.1.p	DOWN	Oates	L. invasa	Susceptible	2015	10.1093/pcp/pcv064	Cluster 106
Eucgr.K00632	RLP	Unknown	RLP_LRR	TM_LRR	Chr11	gene	7050284	7053284	+	PF08263,PF00560	GO:0005515	receptor like protein 6	Eucgr.K00632.1.p							Cluster 106
Eucgr.K00633	RLP	Unknown	RLP_LRR	TM_LRR	Chr11	gene	7073528	7076694	+	PF08263,PF00560	GO:0005515	receptor like protein 7	Eucgr.K00633.1.p							Cluster 106
Eucgr.K00636	RLP	Unknown	RLP_LRR	TM_LRR	Chr11	gene	7155004	7158006	+	PF08263,PF00560	GO:0005515	receptor like protein 6	Eucgr.K00636.1.p	UP	Santos	A. psidii	Susceptible	2020	10.1007/s11103-020-01030-x	Cluster 106
Eucgr.K00640	RLP	Unknown	RLP_LRR	TM_LRR	Chr11	gene	7218338	7221293	+	PF08263,PF13855	GO:0005515	receptor like protein 52	Eucgr.K00640.1.p	DOWN	Oates	L. invasa	Susceptible	2015	10.1093/pcp/pcv064	Cluster 106
Eucgr.K00641	RLP	Unknown	RLP_LRR	TM_LRR	Chr11	gene	7266914	7269835	+	PF08263,PF13855	GO:0005515	receptor like protein 7	Eucgr.K00641.1.p	UP	Xiaohui	R. solanacearum		2022	10.1007/s00438-022-01903-4	Cluster 106
Eucgr.K00835	RLP	Unknown	RLP_LRR	TM_LRR	Chr11	gene	10193311	10195365	+	PF00560,PF13855	GO:0005515	Protein kinase family protein with leucine-rich repeat domain	Eucgr.K00835.1.p							Singleton
Eucgr.K01060	RLK	Unknown	RLK_LRR-XI	TM_K	Chr11	gene	13577133	13580599	-	PF00560,PF00069	GO:0005515,GO:0006468,GO:0005524,GO:0004672	HAESA-like 1	Eucgr.K01060.1.p	DOWN	Xiaohui	R. solanacearum		2022	10.1007/s00438-022-01903-4	Singleton
Eucgr.K01060	RLK	Unknown	RLK_LRR-XI	TM_K	Chr11	gene	13577133	13580599	-	PF00560,PF07714	GO:0005515,GO:0006468,GO:0004672	HAESA-like 1	Eucgr.K01060.1.p	DOWN	Xiaohui	R. solanacearum		2022	10.1007/s00438-022-01903-4	Singleton
Eucgr.K01060	RLK	Unknown	RLK_LRR-XI	TM_K	Chr11	gene	13577133	13580599	-	PF00560,PF07714	GO:0005515,GO:0006468,GO:0004672	HAESA-like 1	Eucgr.K01060.1.p	UP	Xiaohui	R. solanacearum		2022	10.1007/s00438-022-01903-4	Singleton
Eucgr.K01060	RLK	Unknown	RLK_LRR-XI	TM_K	Chr11	gene	13577133	13580599	-	PF00560,PF00069	GO:0005515,GO:0006468,GO:0005524,GO:0004672	HAESA-like 1	Eucgr.K01060.1.p	UP	Xiaohui	R. solanacearum		2022	10.1007/s00438-022-01903-4	Singleton
Eucgr.K01165	RLK	Unknown	RLK_LRR-XII	TM_K_LRR	Chr11	gene	15103423	15107215	+	PF13855,PF00069	GO:0005515,GO:0006468,GO:0005524,GO:0004672	Leucine-rich repeat receptor-like protein kinase family protein	Eucgr.K01165.1.p	DOWN	Mangwanda	C. austroafricana	Resistent	2015	10.1186/s12864-015-1529-x	Singleton
Eucgr.K01165	RLK	Unknown	RLK_LRR-XII	TM_K_LRR	Chr11	gene	15103423	15107215	+	PF13855,PF00069	GO:0005515,GO:0006468,GO:0005524,GO:0004672	Leucine-rich repeat receptor-like protein kinase family protein	Eucgr.K01165.1.p	DOWN	Mangwanda	C. austroafricana	Susceptible	2015	10.1186/s12864-015-1529-x	Singleton
Eucgr.K01321	RLK	Unknown	RLK_LRR-VIII	TM_K_LRR	Chr11	gene	16582270	16587408	-	PF08263,PF07714	GO:0006468,GO:0004672	Leucine-rich repeat protein kinase family protein	Eucgr.K01321.1.p	DOWN	Oates	L. invasa	Resistent	2015	10.1093/pcp/pcv064	Singleton
Eucgr.K01425	RLK	Unknown	RLK_LRR-XI	TM_K_LRR	Chr11	gene	17585355	17588775	+	PF08263,PF00560,PF13855,PF00069	GO:0005515,GO:0006468,GO:0005524,GO:0004672	Leucine-rich repeat transmembrane protein kinase family protein	Eucgr.K01425.1.p	UP	Xiaohui	R. solanacearum		2022	10.1007/s00438-022-01903-4	Singleton
Eucgr.K01521	RLK	Unknown	RLK_LRR-VI	TM_K	Chr11	gene	18625091	18631640	+	PF07714	GO:0006468,GO:0004672	Leucine-rich repeat protein kinase family protein	Eucgr.K01521.3.p	UP	Xiaohui	R. solanacearum		2022	10.1007/s00438-022-01903-4	Singleton
Eucgr.K01750	RLK	Unknown	RLK_LRR-XI	TM_K_LRR	Chr11	gene	22641179	22644963	+	PF00560,PF07714	GO:0005515,GO:0006468,GO:0004672	Leucine-rich repeat protein kinase family protein	Eucgr.K01750.1.p	DOWN	Mangwanda	C. austroafricana	Resistent	2015	10.1186/s12864-015-1529-x	Singleton
Eucgr.K01762	RLK	Unknown	RLK_LRR-VIII	TM_K_LRR_Malec	Chr11	gene	22886994	22899436	-	PF13855,PF00069,PF11721	GO:0005515,GO:0006468,GO:0005524,GO:0004672	Leucine-rich repeat transmembrane protein kinase	Eucgr.K01762.1.p							Singleton
Eucgr.K01804	RLK	Unknown	RLK_LRR-XI	TM_K	Chr11	gene	23576687	23579079	+	PF00560,PF07714	GO:0005515,GO:0006468,GO:0004672	Leucine-rich repeat protein kinase family protein	Eucgr.K01804.1.p	UP	Xiaohui	R. solanacearum		2022	10.1007/s00438-022-01903-4	Singleton
Eucgr.K01935	RLP	Unknown	RLP_LRR	TM_LRR	Chr05	gene	32072483	32074299	+	PF00560,PF13855	GO:0005515	disease resistance family protein / LRR family protein	Eucgr.K01935.1.p							Cluster 38
Eucgr.K01987	RLK	Unknown	RLK_LRR-VIII	TM_K_LRR_Malec	Chr11	gene	21620313	21634236	-	PF13855,PF00069,PF11721	GO:0005515,GO:0006468,GO:0005524,GO:0004672	Leucine-rich repeat transmembrane protein kinase	Eucgr.K01987.1.p							Singleton
Eucgr.K02082	RLK	Unknown	RLK_LRR-III	TM_K_LRR	Chr11	gene	28390152	28392807	+	PF08263,PF13855,PF00069	GO:0005515,GO:0006468,GO:0005524,GO:0004672	Leucine-rich repeat protein kinase family protein	Eucgr.K02082.1.p	DOWN	Mangwanda	C. austroafricana	Resistent	2015	10.1186/s12864-015-1529-x	Singleton
Eucgr.K02082	RLK	Unknown	RLK_LRR-III	TM_K_LRR	Chr11	gene	28390152	28392807	+	PF08263,PF00069	GO:0006468,GO:0005524,GO:0004672	Leucine-rich repeat protein kinase family protein	Eucgr.K02082.1.p	DOWN	Mangwanda	C. austroafricana	Resistent	2015	10.1186/s12864-015-1529-x	Singleton
Eucgr.K02103	RLK	Unknown	RLK_LRR-XII	TM_K_LRR	Chr11	gene	28711093	28714361	-	PF00560,PF00069,PF13855	GO:0005515,GO:0006468,GO:0005524,GO:0004672	Leucine-rich repeat receptor-like protein kinase family protein	Eucgr.K02103.1.p	DOWN	Mangwanda	C. austroafricana	Resistent	2015	10.1186/s12864-015-1529-x	Singleton
Eucgr.K02103	RLK	Unknown	RLK_LRR-XII	TM_K_LRR	Chr11	gene	28711093	28714361	-	PF00560,PF00069,PF13855	GO:0005515,GO:0006468,GO:0005524,GO:0004672	Leucine-rich repeat receptor-like protein kinase family protein	Eucgr.K02103.1.p	DOWN	Oates	L. invasa	Resistent	2015	10.1093/pcp/pcv064	Singleton
Eucgr.K02153	RLK	Unknown	RLK_LRR-XII	TM_K_LRR	Chr11	gene	29314916	29319905	-	PF00560,PF08263,PF13855,PF00069	GO:0005515,GO:0006468,GO:0005524,GO:0004672	Leucine-rich repeat receptor-like protein kinase family protein	Eucgr.K02153.1.p	DOWN	Xiaohui	R. solanacearum		2022	10.1007/s00438-022-01903-4	Cluster 107
Eucgr.K02153	RLK	Unknown	RLK_LRR-XII	TM_K_LRR	Chr11	gene	29314916	29319905	-	PF00560,PF08263,PF13855,PF00069	GO:0005515,GO:0006468,GO:0005524,GO:0004672	Leucine-rich repeat receptor-like protein kinase family protein	Eucgr.K02153.1.p	UP	Xiaohui	R. solanacearum		2022	10.1007/s00438-022-01903-4	Cluster 107
Eucgr.K02153	RLK	Unknown	RLK_LRR-XII	TM_K_LRR	Chr11	gene	29314916	29319905	-	PF00560,PF08263,PF13855,PF00069	GO:0005515,GO:0006468,GO:0005524,GO:0004672	Leucine-rich repeat receptor-like protein kinase family protein	Eucgr.K02153.1.p	DOWN	Oates	L. invasa	Susceptible	2015	10.1093/pcp/pcv064	Cluster 107
Eucgr.K02155	RLK	Unknown	RLK_LRR-XII	TM_K_LRR	Chr11	gene	29361256	29366359	+	PF00560,PF00069,PF13855	GO:0005515,GO:0006468,GO:0005524,GO:0004672	Protein kinase family protein with leucine-rich repeat domain	Eucgr.K02155.1.p	DOWN	Mangwanda	C. austroafricana	Resistent	2015	10.1186/s12864-015-1529-x	Cluster 107
Eucgr.K02160	RLK	Unknown	RLK_LRR-XII	TM_K_LRR	Chr11	gene	29424667	29428251	-	PF08263,PF00560,PF00069,PF13855	GO:0005515,GO:0006468,GO:0005524,GO:0004672	Leucine-rich repeat receptor-like protein kinase family protein	Eucgr.K02160.1.p	DOWN	Oates	L. invasa	Resistent	2015	10.1093/pcp/pcv064	Cluster 107
Eucgr.K02160	RLK	Unknown	RLK_LRR-XII	TM_K_LRR	Chr11	gene	29424667	29428251	-	PF08263,PF00560,PF00069,PF13855	GO:0005515,GO:0006468,GO:0005524,GO:0004672	Leucine-rich repeat receptor-like protein kinase family protein	Eucgr.K02160.1.p	DOWN	Mangwanda	C. austroafricana	Resistent	2015	10.1186/s12864-015-1529-x	Cluster 107
Eucgr.K02280	CLK	Unknown	RLK_LRR-III	TM_K_LRR	Chr11	gene	30636034	30639601	-	PF08263,PF13855,PF00069	GO:0005515,GO:0006468,GO:0005524,GO:0004672	receptor-like kinase 1	Eucgr.K02280.1.p	DOWN	Xiaohui	R. solanacearum		2022	10.1007/s00438-022-01903-4	Singleton
Eucgr.K02280	CLK	Unknown	RLK_LRR-III	TM_K_LRR	Chr11	gene	30636034	30639601	-	PF08263,PF13855,PF00069	GO:0005515,GO:0006468,GO:0005524,GO:0004672	receptor-like kinase 1	Eucgr.K02280.1.p	UP	Xiaohui	R. solanacearum		2022	10.1007/s00438-022-01903-4	Singleton
Eucgr.K02366	RLK	Unknown	RLK_LRR-XII	TM_K_LRR	Chr11	gene	31388993	31393479	+	PF08263,PF07714,PF13855	GO:0006468,GO:0004672,GO:0005515	Leucine-rich repeat receptor-like protein kinase family protein	Eucgr.K02366.1.p	DOWN	Mangwanda	C. austroafricana	Susceptible	2015	10.1186/s12864-015-1529-x	Cluster 108
Eucgr.K02367	RLK	Unknown	RLK_LRR-XII	TM_K	Chr11	gene	31415081	31417217	+	PF13855,PF00069	GO:0005515,GO:0006468,GO:0005524,GO:0004672	Leucine-rich repeat receptor-like protein kinase family protein	Eucgr.K02367.1.p	UP	Santos	A. psidii	Susceptible	2020	10.1007/s11103-020-01030-x	Cluster 108
Eucgr.K02367	RLK	Unknown	RLK_LRR-XII	TM_K	Chr11	gene	31415081	31417217	+	PF13855,PF00069	GO:0005515,GO:0006468,GO:0005524,GO:0004672	Leucine-rich repeat receptor-like protein kinase family protein	Eucgr.K02367.1.p	DOWN	Oates	L. invasa	Resistent	2015	10.1093/pcp/pcv064	Cluster 108
Eucgr.K02381	RLK	Unknown	RLK_LRR-XII	TM_K_LRR	Chr11	gene	31739538	31744299	+	PF08263,PF00560,PF00069,PF13855	GO:0005515,GO:0006468,GO:0005524,GO:0004672	Protein kinase family protein with leucine-rich repeat domain	Eucgr.K02381.1.p	DOWN	Oates	L. invasa	Resistent	2015	10.1093/pcp/pcv064	Cluster 109
Eucgr.K02381	RLK	Unknown	RLK_LRR-XII	TM_K_LRR	Chr11	gene	31739538	31744299	+	PF08263,PF00560,PF00069,PF13855	GO:0005515,GO:0006468,GO:0005524,GO:0004672	Protein kinase family protein with leucine-rich repeat domain	Eucgr.K02381.1.p	UP	Santos	A. psidii	Susceptible	2020	10.1007/s11103-020-01030-x	Cluster 109
Eucgr.K02381	RLK	Unknown	RLK_LRR-XII	TM_K_LRR	Chr11	gene	31739538	31744299	+	PF08263,PF00560,PF00069,PF13855	GO:0005515,GO:0006468,GO:0005524,GO:0004672	Protein kinase family protein with leucine-rich repeat domain	Eucgr.K02381.1.p	DOWN	Oates	L. invasa	Susceptible	2015	10.1093/pcp/pcv064	Cluster 109
Eucgr.K02381	RLK	Unknown	RLK_LRR-XII	TM_K_LRR	Chr11	gene	31739538	31744299	+	PF08263,PF00560,PF00069,PF13855	GO:0005515,GO:0006468,GO:0005524,GO:0004672	Protein kinase family protein with leucine-rich repeat domain	Eucgr.K02381.1.p	DOWN	Xiaohui	R. solanacearum		2022	10.1007/s00438-022-01903-4	Cluster 109
Eucgr.K02386	RLK	Unknown	RLK_LRR-XII	TM_K_LRR	Chr11	gene	31822271	31826333	+	PF08263,PF00560,PF00069,PF13855	GO:0005515,GO:0006468,GO:0005524,GO:0004672	Protein kinase family protein with leucine-rich repeat domain	Eucgr.K02386.1.p	UP	Santos	A. psidii	Susceptible	2020	10.1007/s11103-020-01030-x	Cluster 109
Eucgr.K02386	RLK	Unknown	RLK_LRR-XII	TM_K_LRR	Chr11	gene	31822271	31826333	+	PF08263,PF00560,PF00069,PF13855	GO:0005515,GO:0006468,GO:0005524,GO:0004672	Protein kinase family protein with leucine-rich repeat domain	Eucgr.K02386.1.p	DOWN	Xiaohui	R. solanacearum		2022	10.1007/s00438-022-01903-4	Cluster 109
Eucgr.K02386	RLK	Unknown	RLK_LRR-XII	TM_K_LRR	Chr11	gene	31822271	31826333	+	PF08263,PF00560,PF00069,PF13855	GO:0005515,GO:0006468,GO:0005524,GO:0004672	Protein kinase family protein with leucine-rich repeat domain	Eucgr.K02386.1.p	DOWN	Oates	L. invasa	Resistent	2015	10.1093/pcp/pcv064	Cluster 109
Eucgr.K02386	RLK	Unknown	RLK_LRR-XII	TM_K_LRR	Chr11	gene	31822271	31826333	+	PF08263,PF00560,PF00069,PF13855	GO:0005515,GO:0006468,GO:0005524,GO:0004672	Protein kinase family protein with leucine-rich repeat domain	Eucgr.K02386.1.p	DOWN	Mangwanda	C. austroafricana	Susceptible	2015	10.1186/s12864-015-1529-x	Cluster 109
Eucgr.K02393	RLK	Unknown	RLK_LRR-XII	TM_K_LRR	Chr11	gene	31900750	31904956	+	PF00560,PF00069,PF13855	GO:0005515,GO:0006468,GO:0005524,GO:0004672	Leucine-rich repeat receptor-like protein kinase family protein	Eucgr.K02393.1.p	DOWN	Mangwanda	C. austroafricana	Susceptible	2015	10.1186/s12864-015-1529-x	Cluster 109
Eucgr.K02393	RLK	Unknown	RLK_LRR-XII	TM_K_LRR	Chr11	gene	31900750	31904956	+	PF00560,PF00069,PF13855	GO:0005515,GO:0006468,GO:0005524,GO:0004672	Leucine-rich repeat receptor-like protein kinase family protein	Eucgr.K02393.1.p	DOWN	Mangwanda	C. austroafricana	Resistent	2015	10.1186/s12864-015-1529-x	Cluster 109
Eucgr.K02402	RLK	Unknown	RLK_LRR-XII	TM_K_LRR	Chr11	gene	32017044	32021206	+	PF00560,PF08263,PF00069,PF13855	GO:0005515,GO:0006468,GO:0005524,GO:0004672	Protein kinase family protein with leucine-rich repeat domain	Eucgr.K02402.1.p	DOWN	Oates	L. invasa	Susceptible	2015	10.1093/pcp/pcv064	Cluster 109
Eucgr.K02402	RLK	Unknown	RLK_LRR-XII	TM_K_LRR	Chr11	gene	32017044	32021206	+	PF00560,PF08263,PF00069,PF13855	GO:0005515,GO:0006468,GO:0005524,GO:0004672	Protein kinase family protein with leucine-rich repeat domain	Eucgr.K02402.1.p	DOWN	Mangwanda	C. austroafricana	Susceptible	2015	10.1186/s12864-015-1529-x	Cluster 109
Eucgr.K02402	RLK	Unknown	RLK_LRR-XII	TM_K_LRR	Chr11	gene	32017044	32021206	+	PF00560,PF08263,PF00069,PF13855	GO:0005515,GO:0006468,GO:0005524,GO:0004672	Protein kinase family protein with leucine-rich repeat domain	Eucgr.K02402.1.p	DOWN	Xiaohui	R. solanacearum		2022	10.1007/s00438-022-01903-4	Cluster 109
Eucgr.K02402	RLK	Unknown	RLK_LRR-XII	TM_K_LRR	Chr11	gene	32017044	32021206	+	PF00560,PF08263,PF00069,PF13855	GO:0005515,GO:0006468,GO:0005524,GO:0004672	Protein kinase family protein with leucine-rich repeat domain	Eucgr.K02402.1.p	DOWN	Mangwanda	C. austroafricana	Resistent	2015	10.1186/s12864-015-1529-x	Cluster 109
Eucgr.K02404	RLK	Unknown	RLK_LRR-XII	TM_K	Chr11	gene	32053495	32055800	+	PF00560,PF13855,PF00069	GO:0005515,GO:0006468,GO:0005524,GO:0004672	Leucine-rich repeat receptor-like protein kinase family protein	Eucgr.K02404.1.p	DOWN	Mangwanda	C. austroafricana	Susceptible	2015	10.1186/s12864-015-1529-x	Cluster 109
Eucgr.K02404	RLK	Unknown	RLK_LRR-XII	TM_K	Chr11	gene	32053495	32055800	+	PF00560,PF13855,PF00069	GO:0005515,GO:0006468,GO:0005524,GO:0004672	Leucine-rich repeat receptor-like protein kinase family protein	Eucgr.K02404.1.p	DOWN	Mangwanda	C. austroafricana	Resistent	2015	10.1186/s12864-015-1529-x	Cluster 109
Eucgr.K02406	RLK	Unknown	RLK_LRR-XII	TM_K_LRR	Chr11	gene	32075203	32078712	+	PF08263,PF00560,PF00069,PF13855	GO:0005515,GO:0006468,GO:0005524,GO:0004672	Protein kinase family protein with leucine-rich repeat domain	Eucgr.K02406.1.p	DOWN	Mangwanda	C. austroafricana	Resistent	2015	10.1186/s12864-015-1529-x	Cluster 109
Eucgr.K02406	RLK	Unknown	RLK_LRR-XII	TM_K_LRR	Chr11	gene	32075203	32078712	+	PF08263,PF00560,PF00069,PF13855	GO:0005515,GO:0006468,GO:0005524,GO:0004672	Protein kinase family protein with leucine-rich repeat domain	Eucgr.K02406.1.p	DOWN	Mangwanda	C. austroafricana	Susceptible	2015	10.1186/s12864-015-1529-x	Cluster 109
Eucgr.K02407	RLK	Unknown	RLK_LRR-XII	TM_K_LRR	Chr11	gene	32123133	32126751	+	PF00560,PF00069	GO:0005515,GO:0006468,GO:0005524,GO:0004672	Leucine-rich repeat receptor-like protein kinase family protein	Eucgr.K02407.1.p	DOWN	Mangwanda	C. austroafricana	Resistent	2015	10.1186/s12864-015-1529-x	Cluster 109
Eucgr.K02407	RLK	Unknown	RLK_LRR-XII	TM_K_LRR	Chr11	gene	32123133	32126751	+	PF00560,PF00069	GO:0005515,GO:0006468,GO:0005524,GO:0004672	Leucine-rich repeat receptor-like protein kinase family protein	Eucgr.K02407.1.p	DOWN	Oates	L. invasa	Resistent	2015	10.1093/pcp/pcv064	Cluster 109
Eucgr.K02562	RLK	Unknown	RLK_LRR-XII	TM_K_LRR	Chr11	gene	26844865	26848989	+	PF08263,PF00560,PF00069,PF13855	GO:0005515,GO:0006468,GO:0005524,GO:0004672	Protein kinase family protein with leucine-rich repeat domain	Eucgr.K02562.1.p	DOWN	Mangwanda	C. austroafricana	Resistent	2015	10.1186/s12864-015-1529-x	Singleton
Eucgr.K02562	RLK	Unknown	RLK_LRR-XII	TM_K_LRR	Chr11	gene	26844865	26848989	+	PF08263,PF00560,PF00069,PF13855	GO:0005515,GO:0006468,GO:0005524,GO:0004672	Protein kinase family protein with leucine-rich repeat domain	Eucgr.K02562.1.p	UP	Xiaohui	R. solanacearum		2022	10.1007/s00438-022-01903-4	Singleton
Eucgr.K02562	RLK	Unknown	RLK_LRR-XII	TM_K_LRR	Chr11	gene	26844865	26848989	+	PF08263,PF00560,PF00069,PF13855	GO:0005515,GO:0006468,GO:0005524,GO:0004672	Protein kinase family protein with leucine-rich repeat domain	Eucgr.K02562.1.p	DOWN	Xiaohui	R. solanacearum		2022	10.1007/s00438-022-01903-4	Singleton
Eucgr.K02588	RLK	Unknown	RLK_LRR-XII	TM_K_LRR	Chr11	gene	26254352	26258425	+	PF08263,PF00069	GO:0006468,GO:0005524,GO:0004672	Leucine-rich repeat receptor-like protein kinase family protein	Eucgr.K02588.1.p	DOWN	Oates	L. invasa	Susceptible	2015	10.1093/pcp/pcv064	Singleton
Eucgr.K02774	RLK	Unknown	RLK_LRR-XVI	TM_K_LRR	Chr11	gene	35160346	35162410	-	PF13855,PF00069	GO:0005515,GO:0006468,GO:0005524,GO:0004672	Leucine-rich repeat protein kinase family protein	Eucgr.K02774.1.p	DOWN	Mangwanda	C. austroafricana	Resistent	2015	10.1186/s12864-015-1529-x	Cluster 110
Eucgr.K02775	RLK	Unknown	RLK_LRR-XVI	TM_K_LRR	Chr11	gene	35174545	35176836	-	PF13855,PF00069	GO:0005515,GO:0006468,GO:0005524,GO:0004672	Leucine-rich repeat protein kinase family protein	Eucgr.K02775.1.p	DOWN	Mangwanda	C. austroafricana	Susceptible	2015	10.1186/s12864-015-1529-x	Cluster 110
Eucgr.K02775	RLK	Unknown	RLK_LRR-XVI	TM_K_LRR	Chr11	gene	35174545	35176836	-	PF13855,PF00069	GO:0005515,GO:0006468,GO:0005524,GO:0004672	Leucine-rich repeat protein kinase family protein	Eucgr.K02775.1.p	DOWN	Oates	L. invasa	Resistent	2015	10.1093/pcp/pcv064	Cluster 110
Eucgr.K02775	RLK	Unknown	RLK_LRR-XVI	TM_K_LRR	Chr11	gene	35174545	35176836	-	PF13855,PF00069	GO:0005515,GO:0006468,GO:0005524,GO:0004672	Leucine-rich repeat protein kinase family protein	Eucgr.K02775.1.p	DOWN	Xiaohui	R. solanacearum		2022	10.1007/s00438-022-01903-4	Cluster 110
Eucgr.K02775	RLK	Unknown	RLK_LRR-XVI	TM_K_LRR	Chr11	gene	35174545	35176836	-	PF13855,PF00069	GO:0005515,GO:0006468,GO:0005524,GO:0004672	Leucine-rich repeat protein kinase family protein	Eucgr.K02775.1.p	UP	Santos	A. psidii	Susceptible	2020	10.1007/s11103-020-01030-x	Cluster 110
Eucgr.K02824	RLP	Unknown	RLP_LRR	TM_LRR	Chr11	gene	35606817	35609833	+	PF08263,PF00560,PF13855	GO:0005515	Leucine-rich repeat transmembrane protein kinase	Eucgr.K02824.1.p	DOWN	Xiaohui	R. solanacearum		2022	10.1007/s00438-022-01903-4	Singleton
Eucgr.K02865	RLK	Unknown	RLK_LRR-III	TM_K_LRR	Chr11	gene	35937684	35939740	-	PF13855,PF00069	GO:0005515,GO:0006468,GO:0005524,GO:0004672	Leucine-rich repeat protein kinase family protein	Eucgr.K02865.1.p	UP	Xiaohui	R. solanacearum		2022	10.1007/s00438-022-01903-4	Singleton
Eucgr.K02951	RLK	Unknown	RLK_LRR-III	TM_K_LRR	Chr11	gene	36943409	36946381	+	PF08263,PF00560,PF13855,PF07714	GO:0005515,GO:0006468,GO:0004672	inflorescence meristem receptor-like kinase 2	Eucgr.K02951.1.p	DOWN	Xiaohui	R. solanacearum		2022	10.1007/s00438-022-01903-4	Singleton
Eucgr.K03207	RLK	Unknown	RLK_LRR-I	TM_K_MalecLike	Chr11	gene	40086738	40094915	+	PF13855,PF12819	GO:0005515	Leucine-rich repeat protein kinase family protein	Eucgr.K03207.1.p	UP	Xiaohui	R. solanacearum		2022	10.1007/s00438-022-01903-4	Cluster 111
Eucgr.K03207	RLP	Unknown	RLK_LRR-I	TM_K_MalecLike	Chr11	gene	40086738	40094915	+	PF07714,PF12819	GO:0006468,GO:0004672	Leucine-rich repeat protein kinase family protein	Eucgr.K03207.1.p	UP	Xiaohui	R. solanacearum		2022	10.1007/s00438-022-01903-4	Cluster 111
Eucgr.K03207	RLK	Unknown	RLK_LRR-I	TM_K_MalecLike	Chr11	gene	40086738	40094915	+	PF07714,PF12819	GO:0006468,GO:0004672	Leucine-rich repeat protein kinase family protein	Eucgr.K03207.1.p	UP	Xiaohui	R. solanacearum		2022	10.1007/s00438-022-01903-4	Cluster 111
Eucgr.K03207	RLP	Unknown	RLK_LRR-I	TM_K_MalecLike	Chr11	gene	40086738	40094915	+	PF13855,PF12819	GO:0005515	Leucine-rich repeat protein kinase family protein	Eucgr.K03207.1.p	UP	Xiaohui	R. solanacearum		2022	10.1007/s00438-022-01903-4	Cluster 111
Eucgr.K03208	RLK	Unknown	RLK_LRR-I	TM_K_MalecLike	Chr11	gene	40103194	40112384	+	PF07714,PF12819	GO:0006468,GO:0004672	Leucine-rich repeat protein kinase family protein	Eucgr.K03208.1.p							Cluster 111
Eucgr.K03279	RLK	Unknown	RLK_LRR-IV	TM_K_LRR	Chr11	gene	40914346	40918362	-	PF08263,PF13855,PF07714	GO:0005515,GO:0006468,GO:0004672	Leucine-rich repeat protein kinase family protein	Eucgr.K03279.1.p	DOWN	Mangwanda	C. austroafricana	Resistent	2015	10.1186/s12864-015-1529-x	Singleton
Eucgr.K03279	RLK	Unknown	RLK_LRR-IV	TM_K_LRR	Chr11	gene	40914346	40918362	-	PF08263,PF13855,PF00069	GO:0005515,GO:0006468,GO:0005524,GO:0004672	Leucine-rich repeat protein kinase family protein	Eucgr.K03279.1.p	DOWN	Mangwanda	C. austroafricana	Resistent	2015	10.1186/s12864-015-1529-x	Singleton
Eucgr.L00172	RLK	Unknown	RLK_LRR-XII	TM_K_LRR	scaffold_13	gene	19870	22950	+	PF00560,PF08263,PF07714	GO:0005515,GO:0006468,GO:0004672	Leucine-rich repeat protein kinase family protein	Eucgr.L00172.1.p
Eucgr.L00178	RLK	Unknown	RLK_LRR-XII	TM_K_LRR	scaffold_13	gene	71998	75157	+	PF00560,PF08263,PF13855,PF00069	GO:0005515,GO:0006468,GO:0005524,GO:0004672	Leucine-rich repeat protein kinase family protein	Eucgr.L00178.1.p
Eucgr.L00181	RLK	Unknown	RLK_LRR-XII	TM_K_LRR	scaffold_13	gene	114878	118038	+	PF00560,PF08263,PF00069	GO:0005515,GO:0006468,GO:0005524,GO:0004672	Leucine-rich repeat protein kinase family protein	Eucgr.L00181.1.p
Eucgr.L00183	RLK	Unknown	RLK_LRR-XII	TM_K	scaffold_13	gene	141186	144043	+	PF00069	GO:0006468,GO:0005524,GO:0004672	Leucine-rich repeat protein kinase family protein	Eucgr.L00183.1.p	DOWN	Xiaohui	R. solanacearum		2022	10.1007/s00438-022-01903-4
Eucgr.L00190	RLK	Unknown	RLK_LRR-XII	TM_K_LRR	scaffold_13	gene	236638	240476	+	PF08263,PF13855,PF00069	GO:0005515,GO:0006468,GO:0005524,GO:0004672	Leucine-rich repeat protein kinase family protein	Eucgr.L00190.1.p	UP	Santos	A. psidii	Susceptible	2020	10.1007/s11103-020-01030-x
Eucgr.L00196	RLK	Unknown	RLK_LRR-XII	TM_K_LRR	scaffold_13	gene	287984	291030	+	PF08263,PF13855,PF00069	GO:0005515,GO:0006468,GO:0005524,GO:0004672	Leucine-rich repeat protein kinase family protein	Eucgr.L00196.1.p
Eucgr.L00201	RLK	Unknown	RLK_LRR-XII	TM_K_LRR	scaffold_13	gene	314987	318144	+	PF08263,PF00069	GO:0006468,GO:0005524,GO:0004672	Leucine-rich repeat protein kinase family protein	Eucgr.L00201.1.p
Eucgr.L00204	RLK	Unknown	RLK_LRR-XII	TM_K	scaffold_13	gene	351980	355139	+	PF07714	GO:0006468,GO:0004672	EF-TU receptor	Eucgr.L00204.1.p	UP	Mangwanda	C. austroafricana	Resistent	2015	10.1186/s12864-015-1529-x
Eucgr.L00207	RLK	Unknown	RLK_LRR-XII	TM_K_LRR	scaffold_13	gene	374805	378048	+	PF00560,PF13855,PF00069	GO:0005515,GO:0006468,GO:0005524,GO:0004672	Leucine-rich repeat protein kinase family protein	Eucgr.L00207.1.p
Eucgr.L00213	RLK	Unknown	RLK_LRR-XII	TM_K_LRR	scaffold_13	gene	439281	442505	+	PF08263,PF00069	GO:0006468,GO:0005524,GO:0004672	Leucine-rich repeat protein kinase family protein	Eucgr.L00213.1.p
Eucgr.L00221	RLK	Unknown	RLK_LRR-XII	TM_K_LRR	scaffold_13	gene	654365	657826	+	PF08263,PF13855,PF00069	GO:0005515,GO:0006468,GO:0005524,GO:0004672	Leucine-rich repeat protein kinase family protein	Eucgr.L00221.1.p
Eucgr.L00223	RLK	Unknown	RLK_LRR-XII	TM_K_LRR	scaffold_13	gene	688715	696112	+	PF08263,PF00560,PF00069	GO:0005515,GO:0006468,GO:0005524,GO:0004672	Leucine-rich repeat protein kinase family protein	Eucgr.L00223.1.p
Eucgr.L00299	RLK	Unknown	RLK_LRR-XII	TM_K_LRR	scaffold_15	gene	13315	16530	+	PF00560,PF08263,PF07714,PF13855	GO:0005515,GO:0006468,GO:0004672	Leucine-rich repeat protein kinase family protein	Eucgr.L00299.1.p
Eucgr.L00303	RLK	Unknown	RLK_LRR-XII	TM_K_LRR	scaffold_15	gene	58389	61650	+	PF00560,PF08263,PF13855,PF00069	GO:0005515,GO:0006468,GO:0005524,GO:0004672	Leucine-rich repeat protein kinase family protein	Eucgr.L00303.1.p
Eucgr.L00313	RLK	Unknown	RLK_LRR-XII	TM_K_LRR	scaffold_15	gene	244554	247711	+	PF08263,PF13855,PF00069	GO:0005515,GO:0006468,GO:0005524,GO:0004672	Leucine-rich repeat protein kinase family protein	Eucgr.L00313.1.p
Eucgr.L00318	RLK	Unknown	RLK_LRR-XII	TM_K_LRR	scaffold_15	gene	278688	282749	+	PF00560,PF08263,PF00069	GO:0005515,GO:0006468,GO:0005524,GO:0004672	Leucine-rich repeat protein kinase family protein	Eucgr.L00318.1.p	DOWN	Xiaohui	R. solanacearum		2022	10.1007/s00438-022-01903-4
Eucgr.L00321	RLK	Unknown	RLK_LRR-XII	TM_K	scaffold_15	gene	419157	421983	+	PF00069	GO:0006468,GO:0005524,GO:0004672	Leucine-rich repeat protein kinase family protein	Eucgr.L00321.1.p
Eucgr.L00370	RLK	Unknown	RLK_LRR-XII	TM_K_LRR	scaffold_19	gene	234040	237148	+	PF08263,PF00560,PF07714,PF13855	GO:0005515,GO:0006468,GO:0004672	Protein kinase family protein with leucine-rich repeat domain	Eucgr.L00370.1.p
Eucgr.L00381	RLK	Unknown	RLK_LRR-XII	TM_K_LRR	scaffold_19	gene	616996	621228	-	PF08263,PF00560,PF00069	GO:0005515,GO:0006468,GO:0005524,GO:0004672	Leucine-rich repeat receptor-like protein kinase family protein	Eucgr.L00381.1.p	DOWN	Mangwanda	C. austroafricana	Resistent	2015	10.1186/s12864-015-1529-x
Eucgr.L00381	RLK	Unknown	RLK_LRR-XII	TM_K_LRR	scaffold_19	gene	616996	621228	-	PF08263,PF00560,PF00069	GO:0005515,GO:0006468,GO:0005524,GO:0004672	Leucine-rich repeat receptor-like protein kinase family protein	Eucgr.L00381.1.p	DOWN	Oates	L. invasa	Resistent	2015	10.1093/pcp/pcv064
Eucgr.L00425	RLK	Unknown	RLK_LRR-XII	TM_K_LRR	scaffold_22	gene	142925	146064	-	PF08263,PF13855,PF00069	GO:0005515,GO:0006468,GO:0005524,GO:0004672	Leucine-rich repeat protein kinase family protein	Eucgr.L00425.1.p
Eucgr.L00469	RLK	Unknown	RLK_LRR-XII	TM_K_LRR	scaffold_24	gene	88611	91807	+	PF00560,PF08263,PF00069	GO:0005515,GO:0006468,GO:0005524,GO:0004672	Leucine-rich repeat protein kinase family protein	Eucgr.L00469.1.p	DOWN	Mangwanda	C. austroafricana	Resistent	2015	10.1186/s12864-015-1529-x
Eucgr.L00469	RLK	Unknown	RLK_LRR-XII	TM_K_LRR	scaffold_24	gene	88611	91807	+	PF00560,PF08263,PF00069	GO:0005515,GO:0006468,GO:0005524,GO:0004672	Leucine-rich repeat protein kinase family protein	Eucgr.L00469.1.p	DOWN	Oates	L. invasa	Resistent	2015	10.1093/pcp/pcv064
Eucgr.L00469	RLK	Unknown	RLK_LRR-XII	TM_K_LRR	scaffold_24	gene	88611	91807	+	PF00560,PF08263,PF00069	GO:0005515,GO:0006468,GO:0005524,GO:0004672	Leucine-rich repeat protein kinase family protein	Eucgr.L00469.1.p	UP	Xiaohui	R. solanacearum		2022	10.1007/s00438-022-01903-4
Eucgr.L00469	RLK	Unknown	RLK_LRR-XII	TM_K_LRR	scaffold_24	gene	88611	91807	+	PF00560,PF08263,PF00069	GO:0005515,GO:0006468,GO:0005524,GO:0004672	Leucine-rich repeat protein kinase family protein	Eucgr.L00469.1.p	DOWN	Xiaohui	R. solanacearum		2022	10.1007/s00438-022-01903-4
Eucgr.L00475	RLK	Unknown	RLK_LRR-XII	TM_K	scaffold_24	gene	215029	218260	+	PF00069	GO:0006468,GO:0005524,GO:0004672	Leucine-rich repeat protein kinase family protein	Eucgr.L00475.1.p
Eucgr.L00480	RLK	Unknown	RLK_LRR-XII	TM_K_LRR	scaffold_24	gene	245332	249093	+	PF00560,PF08263,PF00069	GO:0005515,GO:0006468,GO:0005524,GO:0004672	EF-TU receptor	Eucgr.L00480.1.p	DOWN	Xiaohui	R. solanacearum		2022	10.1007/s00438-022-01903-4
Eucgr.L00483	RLK	Unknown	RLK_LRR-XII	TM_K_LRR	scaffold_24	gene	271202	274364	+	PF13855,PF00069	GO:0005515,GO:0006468,GO:0005524,GO:0004672	Leucine-rich repeat protein kinase family protein	Eucgr.L00483.1.p
Eucgr.L00487	RLK	Unknown	RLK_LRR-XII	TM_K	scaffold_24	gene	304281	306385	+	PF00560,PF00069	GO:0005515,GO:0006468,GO:0005524,GO:0004672	Leucine-rich repeat protein kinase family protein	Eucgr.L00487.1.p
Eucgr.L00514	RLP	Unknown	RLP_LRR	TM_LRR	Chr09	gene	39158523	39160809	+	PF00560,PF13855	GO:0005515	phytosulfokin receptor 1	Eucgr.L00514.1.p							Cluster 94
Eucgr.L00515	RLP	Unknown	RLP_LRR	TM_LRR	Chr09	gene	39203846	39206233	+	PF08263,PF00560,PF13855	GO:0005515	phytosulfokin receptor 1	Eucgr.L00515.1.p	DOWN	Mangwanda	C. austroafricana	Susceptible	2015	10.1186/s12864-015-1529-x	Cluster 94
Eucgr.L00518	RLP	Unknown	RLP_LRR	TM_LRR	Chr09	gene	39286191	39287674	+	PF00560,PF13855	GO:0005515	phytosulfokin receptor 1	Eucgr.L00518.1.p							Cluster 94
Eucgr.L00610	RLP	Unknown	RLP_LRR	TM_LRR	scaffold_31	gene	211547	214234	+	PF08263,PF00560,PF13855	GO:0005515	disease resistance family protein / LRR family protein	Eucgr.L00610.1.p
Eucgr.L00617	RLP	Unknown	RLP_LRR	TM_LRR	scaffold_32	gene	67359	69524	+	PF08263,PF13855	GO:0005515	Leucine-rich receptor-like protein kinase family protein	Eucgr.L00617.1.p
Eucgr.L00665	RLP	Unknown	RLP_LRR	TM_LRR	scaffold_33	gene	129650	132514	-	PF00560,PF13855	GO:0005515	receptor like protein 6	Eucgr.L00665.1.p
Eucgr.L00692	RLK	Unknown	RLK_LRR-XII	TM_K_LRR	scaffold_40	gene	52652	55145	-	PF00560,PF00069	GO:0005515,GO:0006468,GO:0005524,GO:0004672	Leucine-rich repeat receptor-like protein kinase family protein	Eucgr.L00692.1.p	DOWN	Mangwanda	C. austroafricana	Susceptible	2015	10.1186/s12864-015-1529-x
Eucgr.L00692	RLK	Unknown	RLK_LRR-XII	TM_K_LRR	scaffold_40	gene	52652	55145	-	PF00560,PF00069	GO:0005515,GO:0006468,GO:0005524,GO:0004672	Leucine-rich repeat receptor-like protein kinase family protein	Eucgr.L00692.1.p	DOWN	Oates	L. invasa	Resistent	2015	10.1093/pcp/pcv064
Eucgr.L00692	RLK	Unknown	RLK_LRR-XII	TM_K_LRR	scaffold_40	gene	52652	55145	-	PF00560,PF00069	GO:0005515,GO:0006468,GO:0005524,GO:0004672	Leucine-rich repeat receptor-like protein kinase family protein	Eucgr.L00692.1.p	DOWN	Mangwanda	C. austroafricana	Resistent	2015	10.1186/s12864-015-1529-x
Eucgr.L00821	RLK	Unknown	RLK_LRR-XII	TM_K_LRR	scaffold_58	gene	38327	41480	+	PF00560,PF08263,PF00069	GO:0005515,GO:0006468,GO:0005524,GO:0004672	Leucine-rich repeat protein kinase family protein	Eucgr.L00821.1.p
Eucgr.L00863	RLP	Unknown	RLP_LRR	TM_LRR	scaffold_65	gene	32377	35613	-	PF08263,PF00560,PF13855	GO:0005515	receptor like protein 6	Eucgr.L00863.1.p	UP	Santos	A. psidii	Susceptible	2020	10.1007/s11103-020-01030-x
Eucgr.L00872	RLP	Unknown	RLP_LRR	TM_LRR	scaffold_65	gene	166793	170234	-	PF08263,PF00560,PF13855	GO:0005515	receptor like protein 35	Eucgr.L00872.1.p
Eucgr.L00983	RLK	Unknown	RLK_LRR-XII	TM_K_LRR	scaffold_81	gene	174482	178104	+	PF08263,PF00560,PF00069	GO:0005515,GO:0006468,GO:0005524,GO:0004672	Leucine-rich repeat receptor-like protein kinase family protein	Eucgr.L00983.1.p
Eucgr.L01191	RLK	Unknown	RLK_LRR-XIII	TM_K_LRR	scaffold_131	gene	36725	40330	-	PF08263,PF00560,PF13855,PF00069	GO:0005515,GO:0006468,GO:0005524,GO:0004672	Leucine-rich repeat receptor-like protein kinase family protein	Eucgr.L01191.1.p	DOWN	Oates	L. invasa	Susceptible	2015	10.1093/pcp/pcv064
Eucgr.L01191	RLK	Unknown	RLK_LRR-XIII	TM_K_LRR	scaffold_131	gene	36725	40330	-	PF08263,PF00560,PF13855,PF00069	GO:0005515,GO:0006468,GO:0005524,GO:0004672	Leucine-rich repeat receptor-like protein kinase family protein	Eucgr.L01191.1.p	DOWN	Oates	L. invasa	Resistent	2015	10.1093/pcp/pcv064
Eucgr.L01191	RLK	Unknown	RLK_LRR-XIII	TM_K_LRR	scaffold_131	gene	36725	40330	-	PF08263,PF00560,PF13855,PF00069	GO:0005515,GO:0006468,GO:0005524,GO:0004672	Leucine-rich repeat receptor-like protein kinase family protein	Eucgr.L01191.1.p	DOWN	Mangwanda	C. austroafricana	Susceptible	2015	10.1186/s12864-015-1529-x
Eucgr.L01191	RLK	Unknown	RLK_LRR-XIII	TM_K_LRR	scaffold_131	gene	36725	40330	-	PF08263,PF00560,PF13855,PF00069	GO:0005515,GO:0006468,GO:0005524,GO:0004672	Leucine-rich repeat receptor-like protein kinase family protein	Eucgr.L01191.1.p	DOWN	Mangwanda	C. austroafricana	Resistent	2015	10.1186/s12864-015-1529-x
Eucgr.L01192	RLP	Unknown	RLP_LRR	TM_LRR	scaffold_132	gene	32	4821	+	PF08263,PF00560,PF13855	GO:0005515	disease resistance family protein / LRR family protein	Eucgr.L01192.1.p
Eucgr.L01193	RLP	Unknown	RLP_LRR	TM_LRR	scaffold_132	gene	8092	10890	+	PF08263,PF00560,PF13855	GO:0005515	disease resistance family protein / LRR family protein	Eucgr.L01193.1.p
Eucgr.L01229	RLK	Unknown	RLK_LRR-XII	TM_K_LRR	scaffold_140	gene	58951	61469	+	PF00560,PF08263,PF00069,PF13855	GO:0005515,GO:0006468,GO:0005524,GO:0004672	Leucine-rich repeat protein kinase family protein	Eucgr.L01229.1.p	DOWN	Oates	L. invasa	Resistent	2015	10.1093/pcp/pcv064
Eucgr.L01229	RLK	Unknown	RLK_LRR-XII	TM_K_LRR	scaffold_140	gene	58951	61469	+	PF00560,PF08263,PF00069,PF13855	GO:0005515,GO:0006468,GO:0005524,GO:0004672	Leucine-rich repeat protein kinase family protein	Eucgr.L01229.1.p	UP	Xiaohui	R. solanacearum		2022	10.1007/s00438-022-01903-4
Eucgr.L01229	RLK	Unknown	RLK_LRR-XII	TM_K_LRR	scaffold_140	gene	58951	61469	+	PF00560,PF08263,PF00069,PF13855	GO:0005515,GO:0006468,GO:0005524,GO:0004672	Leucine-rich repeat protein kinase family protein	Eucgr.L01229.1.p	UP	Santos	A. psidii	Susceptible	2020	10.1007/s11103-020-01030-x
Eucgr.L01242	RLK	Unknown	RLP_LRR	TM	scaffold_144	gene	151115	153373	-	PF07714	GO:0006468,GO:0004672	EF-TU receptor	Eucgr.L01242.1.p
Eucgr.L01243	RLK	Unknown	RLK_LRR-XII	TM_K_LRR	scaffold_144	gene	157104	160368	-	PF08263,PF00560,PF07714	GO:0005515,GO:0006468,GO:0004672	Leucine-rich repeat protein kinase family protein	Eucgr.L01243.1.p
Eucgr.L01316	RLP	Unknown	RLP_LRR	TM_LRR	scaffold_166	gene	44357	49905	+	PF13855	GO:0005515	receptor like protein 9	Eucgr.L01316.1.p	DOWN	Xiaohui	R. solanacearum		2022	10.1007/s00438-022-01903-4
Eucgr.L01316	RLP	Unknown	RLP_LRR	TM_LRR	scaffold_166	gene	44357	49905	+	PF13855	GO:0005515	receptor like protein 9	Eucgr.L01316.1.p	DOWN	Oates	L. invasa	Resistent	2015	10.1093/pcp/pcv064
Eucgr.L01552	RLK	Unknown	RLP_LRR	TM	scaffold_250	gene	17705	20042	-	PF00560,PF07714	GO:0005515,GO:0006468,GO:0004672	EF-TU receptor	Eucgr.L01552.1.p
Eucgr.L01594	RLK	Unknown	RLK_LRR-VIII	TM_K_LRR_Malec	scaffold_265	gene	14267	22533	+	PF07714,PF11721	GO:0006468,GO:0004672	Leucine-rich repeat transmembrane protein kinase	Eucgr.L01594.1.p
Eucgr.L01679	RLP	Unknown	RLP_LRR	TM_LRR	scaffold_304	gene	39846	40872	-	PF13855	GO:0005515	receptor like protein 21	Eucgr.L01679.1.p
Eucgr.L01766	RLK	Unknown	RLK_LRR-XII	TM_K_LRR	scaffold_346	gene	27386	31766	-	PF08263,PF07714,PF13855	GO:0006468,GO:0004672,GO:0005515	Leucine-rich repeat protein kinase family protein	Eucgr.L01766.1.p
Eucgr.L01784	RLK	Unknown	RLK_LRR-XII	TM_K_LRR	scaffold_361	gene	7556	10991	-	PF08263,PF13855,PF00069	GO:0005515,GO:0006468,GO:0005524,GO:0004672	Leucine-rich receptor-like protein kinase family protein	Eucgr.L01784.1.p
Eucgr.L01787	RLK	Unknown	RLK_LRR-VIII	TM_K_LRR_Malec	scaffold_364	gene	10766	26446	+	PF13855,PF00069,PF11721	GO:0005515,GO:0006468,GO:0005524,GO:0004672	Leucine-rich repeat transmembrane protein kinase	Eucgr.L01787.1.p	UP	Xiaohui	R. solanacearum		2022	10.1007/s00438-022-01903-4
Eucgr.L01824	RLK	Unknown	RLK_LRR-XII	TM_K	scaffold_383	gene	574	4634	+	PF00069	GO:0006468,GO:0005524,GO:0004672	Leucine-rich repeat protein kinase family protein	Eucgr.L01824.1.p
Eucgr.L01837	RLK	Unknown	RLK_LRR-XIII	TM_K_LRR	scaffold_393	gene	51012	55386	+	PF00560,PF13855,PF00069	GO:0005515,GO:0006468,GO:0005524,GO:0004672	Leucine-rich repeat receptor-like protein kinase family protein	Eucgr.L01837.1.p
Eucgr.L01857	RLK	Unknown	RLK_LRR-XII	TM_K_LRR	scaffold_402	gene	18454	21525	-	PF00560,PF13855,PF00069	GO:0005515,GO:0006468,GO:0005524,GO:0004672	Leucine-rich repeat protein kinase family protein	Eucgr.L01857.1.p	UP	Santos	A. psidii	Susceptible	2020	10.1007/s11103-020-01030-x
Eucgr.L01857	RLK	Unknown	RLK_LRR-XII	TM_K_LRR	scaffold_402	gene	18454	21525	-	PF00560,PF13855,PF00069	GO:0005515,GO:0006468,GO:0005524,GO:0004672	Leucine-rich repeat protein kinase family protein	Eucgr.L01857.1.p	DOWN	Mangwanda	C. austroafricana	Resistent	2015	10.1186/s12864-015-1529-x
Eucgr.L01907	RLP	Unknown	RLP_LRR	TM	scaffold_436	gene	6696	7568	+	PF00560	GO:0005515	receptor like protein 45	Eucgr.L01907.1.p
Eucgr.L01956	RLK	Unknown	RLP_LRR	TM_LRR	scaffold_471	gene	18097	20484	-	PF07714,PF08263	GO:0006468,GO:0004672	Leucine-rich repeat protein kinase family protein	Eucgr.L01956.1.p
Eucgr.L01986	RLK	Unknown	RLK_LRR-XII	TM_K_LRR	scaffold_490	gene	15997	19498	+	PF08263,PF00560,PF00069	GO:0005515,GO:0006468,GO:0005524,GO:0004672	Leucine-rich repeat protein kinase family protein	Eucgr.L01986.1.p
Eucgr.L02010	RLP	Unknown	RLP_LRR	TM_LRR	scaffold_509	gene	18700	22154	-	PF08263,PF13855	GO:0005515	disease resistance family protein / LRR family protein	Eucgr.L02010.1.p
Eucgr.L02020	RLP	Unknown	RLP_LRR	TM	scaffold_522	gene	14684	19390	-			receptor like protein 15	Eucgr.L02020.1.p
Eucgr.L02094	RLP	Unknown	RLP_LRR	TM_LRR	scaffold_578	gene	568	2965	+	PF13855	GO:0005515	receptor like protein 15	Eucgr.L02094.1.p
Eucgr.L02095	RLP	Unknown	RLP_LRR	TM_LRR	scaffold_578	gene	9499	10767	+	PF00560	GO:0005515	receptor like protein 56	Eucgr.L02095.1.p
Eucgr.L02210	RLK	Unknown	RLK_LRR-XII	TM_K_LRR	scaffold_674	gene	11291	14730	+	PF08263,PF00560,PF13855,PF00069	GO:0005515,GO:0006468,GO:0005524,GO:0004672	Leucine-rich repeat receptor-like protein kinase family protein	Eucgr.L02210.1.p	DOWN	Oates	L. invasa	Susceptible	2015	10.1093/pcp/pcv064
Eucgr.L02210	RLK	Unknown	RLK_LRR-XII	TM_K_LRR	scaffold_674	gene	11291	14730	+	PF08263,PF00560,PF13855,PF00069	GO:0005515,GO:0006468,GO:0005524,GO:0004672	Leucine-rich repeat receptor-like protein kinase family protein	Eucgr.L02210.1.p	UP	Santos	A. psidii	Susceptible	2020	10.1007/s11103-020-01030-x
Eucgr.L02368	RLK	Unknown	RLK_LRR-XII	TM_K	scaffold_828	gene	13223	16204	-	PF00560,PF00069	GO:0005515,GO:0006468,GO:0005524,GO:0004672	Leucine-rich repeat protein kinase family protein	Eucgr.L02368.1.p
Eucgr.L02485	RLK	Unknown	RLK_LRR-XVI	TM_K_LRR	scaffold_951	gene	3100	5274	+	PF13855,PF07714	GO:0005515,GO:0006468,GO:0004672	Leucine-rich repeat protein kinase family protein	Eucgr.L02485.1.p
Eucgr.L02633	RLP	Unknown	RLP_LRR	TM_LRR	scaffold_1130	gene	7155	10196	+	PF08263,PF13855	GO:0005515	disease resistance family protein / LRR family protein	Eucgr.L02633.1.p	UP	Xiaohui	R. solanacearum		2022	10.1007/s00438-022-01903-4
Eucgr.L02764	RLK	Unknown	RLK_LRR-XII	TM_K	scaffold_1338	gene	8454	11260	-	PF01636,PF00560,PF13855	GO:0005515	Leucine-rich repeat protein kinase family protein	Eucgr.L02764.1.p
Eucgr.L02820	RLK	Unknown	RLK_LRR-XII	TM_K_LRR	scaffold_1446	gene	1564	4543	+	PF08263,PF00560,PF00069	GO:0005515,GO:0006468,GO:0005524,GO:0004672	Leucine-rich repeat protein kinase family protein	Eucgr.L02820.1.p	DOWN	Mangwanda	C. austroafricana	Resistent	2015	10.1186/s12864-015-1529-x
Eucgr.L02820	RLK	Unknown	RLK_LRR-XII	TM_K_LRR	scaffold_1446	gene	1564	4543	+	PF08263,PF00560,PF00069	GO:0005515,GO:0006468,GO:0005524,GO:0004672	Leucine-rich repeat protein kinase family protein	Eucgr.L02820.1.p	DOWN	Mangwanda	C. austroafricana	Susceptible	2015	10.1186/s12864-015-1529-x
Eucgr.L02928	RLK	Unknown	RLK_LRR-XII	TM_K_LRR	scaffold_1629	gene	3038	6706	+	PF08263,PF13855,PF00069	GO:0005515,GO:0006468,GO:0005524,GO:0004672	Leucine-rich repeat receptor-like protein kinase family protein	Eucgr.L02928.1.p	UP	Santos	A. psidii	Susceptible	2020	10.1007/s11103-020-01030-x
Eucgr.L02928	RLK	Unknown	RLK_LRR-XII	TM_K_LRR	scaffold_1629	gene	3038	6706	+	PF08263,PF13855,PF00069	GO:0005515,GO:0006468,GO:0005524,GO:0004672	Leucine-rich repeat receptor-like protein kinase family protein	Eucgr.L02928.1.p	DOWN	Oates	L. invasa	Resistent	2015	10.1093/pcp/pcv064
Eucgr.L03058	RLK	Unknown	RLK_LRR-XI	TM_K_LRR	scaffold_1882	gene	101	2170	+	PF00560,PF13855,PF00069	GO:0005515,GO:0006468,GO:0005524,GO:0004672	Protein kinase family protein with leucine-rich repeat domain	Eucgr.L03058.1.p
Eucgr.L03069	RLP	Unknown	RLP_LRR	TM_LRR	scaffold_1912	gene	1447	3000	+	PF00560,PF13855	GO:0005515	receptor like protein 13	Eucgr.L03069.1.p
Eucgr.L03115	RLP	Unknown	RLP_LRR	TM_LRR	scaffold_2011	gene	2362	4500	-	PF13855	GO:0005515	receptor like protein 13	Eucgr.L03115.1.p
Eucgr.L03209	RLK	Unknown	RLK_LRR-XI	TM_K	scaffold_2294	gene	38	1884	+	PF13855,PF00069	GO:0005515,GO:0006468,GO:0005524,GO:0004672	Protein kinase family protein with leucine-rich repeat domain	Eucgr.L03209.1.p
